# Supplementary material for: Comprehensive Identification of Single Nucleotide Polymorphisms Associated with Beta-lactam Resistance within Pneumococcal Mosaic Genes
Source: PLoS Genet. 2014 Aug 7;10(8):e1004547. doi: 10.1371/journal.pgen.1004547 (PMC4125147; doi:10.1371/journal.pgen.1004547)
Supplement: Table S3 — Associations detected in the Massachusetts data. Summary of all association statistics and LD analysis for variations that show significant association in Massachusetts data. Columns were summarized using the same scheme described in Table S2. (XLS) [file pgen.1004547.s007.xls]

## Sheet: SUMMARY.MA.HIT.txt
genome_coordinate(ATCC700669_ref)	A1	MAF	A2	OR	linkage	gene_information
12422	T	0.06633	C	NA	DISCRETE	SPN23F00130 12360 14318 putative putative cell division protease FtsH
35944	T	0.01658	C	41.61	DISCRETE	SPN23F00430 35569 36352 putative membrane protein (pseudogene)
68424	T	0.06136	C	119.5	DISCRETE	SPN23F00720 67749 69047 adenylosuccinate lyase
74232	A	0.141	C	32.98	BLOCK_1#	intergenic
74242	A	0.1542	G	34.26	BLOCK_1#	intergenic
99427	C	0.0597	T	51.35	DISCRETE	intergenic
107211	T	0.06799	C	87.57	BLOCK_2#	SPN23F01140 105889 107739 polysaccharide biosynthesis protein
107328	T	0.06965	G	47.87	BLOCK_2#	SPN23F01140 105889 107739 polysaccharide biosynthesis protein
107469	T	0.08955	C	8.559	BLOCK_2#	SPN23F01140 105889 107739 polysaccharide biosynthesis protein
121800	C	0.1277	T	0.1186	BLOCK_3#	intergenic
121833	C	0.1045	T	0.1126	BLOCK_3#	intergenic
121838	A	0.1045	G	0.1126	BLOCK_3#	intergenic
121850	A	0.2322	G	6.988	BLOCK_3#	intergenic
121936	T	0.2637	C	0.1599	BLOCK_3#	intergenic
122027	C	0.4262	T	0.2384	DISCRETE	intergenic
122055	A	0.3101	G	0.2108	BLOCK_4#	intergenic
122057	A	0.1808	C	0.1128	BLOCK_4#	intergenic
122127	C	0.2736	G	0.2519	DISCRETE	intergenic
122235	C	0.393	T	0.3008	BLOCK_5#	intergenic
122686	T	0.08789	C	13.8	BLOCK_5#	intergenic
122887	C	0.08789	T	13.8	BLOCK_5#	intergenic
123028	T	0.09121	C	8.047	BLOCK_6#	SPN23F01280 122894 123133 hypothetical protein
123068	T	0.2106	C	0.1127	BLOCK_6#	SPN23F01280 122894 123133 hypothetical protein
123072	T	0.209	C	0.1135	BLOCK_6#	SPN23F01280 122894 123133 hypothetical protein
123080	A	0.2206	G	0.1336	BLOCK_6#	SPN23F01280 122894 123133 hypothetical protein
123097	G	0.204	A	0.08255	BLOCK_7#	SPN23F01280 122894 123133 hypothetical protein
123194	A	0.2139	G	0.1536	BLOCK_7#	intergenic
123237	A	0.08292	G	12.02	BLOCK_7#	intergenic
123297	T	0.2255	C	0.136	BLOCK_7#	intergenic
123309	G	0.08292	A	12.02	BLOCK_7#	intergenic
123370	A	0.1128	G	0.08603	BLOCK_7#	intergenic
123908	C	0.0796	A	26.51	BLOCK_8#	SPN23F01290 123682 125858 pneumococcal surface protein PspA (pseudogene)
123918	A	0.1692	G	6.23	BLOCK_8#	SPN23F01290 123682 125858 pneumococcal surface protein PspA (pseudogene)
125095	A	0.06302	C	184.8	BLOCK_9#	SPN23F01290 123682 125858 pneumococcal surface protein PspA (pseudogene)
125097	C	0.06302	G	184.8	BLOCK_9#	SPN23F01290 123682 125858 pneumococcal surface protein PspA (pseudogene)
125120	T	0.257	A	4.784	BLOCK_9#	SPN23F01290 123682 125858 pneumococcal surface protein PspA (pseudogene)
128912	G	0.1211	A	26.31	BLOCK_10#	SPN23F01340 127986 129899 glucose inhibited division protein A
129008	A	0.2886	G	6.11	BLOCK_10#	SPN23F01340 127986 129899 glucose inhibited division protein A
129032	C	0.3051	T	6.923	BLOCK_11#	SPN23F01340 127986 129899 glucose inhibited division protein A
129036	A	0.1227	G	26.93	BLOCK_11#	SPN23F01340 127986 129899 glucose inhibited division protein A
129047	C	0.1443	T	13.06	BLOCK_11#	SPN23F01340 127986 129899 glucose inhibited division protein A
132120	A	0.05141	G	225.5	DISCRETE	SPN23F01360 131959 132192 conserved hypothetical protein
133088	G	0.262	T	6.931	BLOCK_12#	SPN23F01370 133010 133162 putative membrane protein
133142	A	0.3068	G	6.576	BLOCK_12#	SPN23F01370 133010 133162 putative membrane protein
133601	T	0.1393	C	0.08839	BLOCK_12#	SPN23F01390 133527 134210 glycoprotease family protein
133619	C	0.2007	T	0.08791	BLOCK_12#	SPN23F01390 133527 134210 glycoprotease family protein
133643	C	0.3217	T	0.1448	BLOCK_12#	SPN23F01390 133527 134210 glycoprotease family protein
133649	A	0.1393	T	0.08839	BLOCK_12#	SPN23F01390 133527 134210 glycoprotease family protein
133669	A	0.141	C	0.0904	BLOCK_12#	SPN23F01390 133527 134210 glycoprotease family protein
133670	G	0.1957	A	0.08821	BLOCK_12#	SPN23F01390 133527 134210 glycoprotease family protein
133679	C	0.3201	T	0.134	BLOCK_12#	SPN23F01390 133527 134210 glycoprotease family protein
133685	G	0.1426	A	0.08704	BLOCK_12#	SPN23F01390 133527 134210 glycoprotease family protein
133712	G	0.3748	A	0.1754	BLOCK_12#	SPN23F01390 133527 134210 glycoprotease family protein
133724	A	0.3184	G	0.1757	BLOCK_13#	SPN23F01390 133527 134210 glycoprotease family protein
133733	C	0.3449	T	0.2111	BLOCK_13#	SPN23F01390 133527 134210 glycoprotease family protein
135041	A	0.4793	G	0.1559	BLOCK_14#	SPN23F01410 134634 135644 putative glycoprotease
135047	T	0.4793	C	0.1559	BLOCK_14#	SPN23F01410 134634 135644 putative glycoprotease
135077	G	0.476	T	4.592	BLOCK_14#	SPN23F01410 134634 135644 putative glycoprotease
135083	A	0.4793	T	4.355	BLOCK_14#	SPN23F01410 134634 135644 putative glycoprotease
144556	A	0.01658	G	51.35	DISCRETE	SPN23F01500 143589 144761 UDP-glucose 6-dehydrogenase
148867	G	0.2852	A	3.802	DISCRETE	intergenic
162194	A	0.4279	G	9.09	DISCRETE	intergenic
162255	A	0.4444	G	7.276	DISCRETE	intergenic
167749	T	0.06302	C	13.38	DISCRETE	SPN23F01740 167640 168275 riboflavin synthase alpha chain
171961	A	0.01327	G	72.81	DISCRETE	SPN23F01790 171742 172773 putative carboxypeptidase, possible microcin immunity protein
171969	T	0.01327	C	72.81	DISCRETE	SPN23F01790 171742 172773 putative carboxypeptidase, possible microcin immunity protein
173113	A	0.06136	G	12.15	DISCRETE	SPN23F01800 173028 173711 putative membrane protein
174338	G	0.01161	A	NA	DISCRETE	SPN23F01810 173723 174667 CorA-like Mg2+ transporter protein
209309	G	0.4063	C	5.408	DISCRETE	SPN23F02300 209079 209651 putative inner membrane component of ABC transporter
237753	T	0.2388	C	0.2319	BLOCK_15#	SPN23F02550 237622 238671 luciferase-like monooxygenase
237768	T	0.2587	C	0.2565	BLOCK_15#	SPN23F02550 237622 238671 luciferase-like monooxygenase
237813	T	0.2338	C	0.2061	BLOCK_15#	SPN23F02550 237622 238671 luciferase-like monooxygenase
237834	C	0.06965	T	70.12	BLOCK_16#	SPN23F02550 237622 238671 luciferase-like monooxygenase
237940	G	0.4627	T	0.2412	BLOCK_16#	SPN23F02550 237622 238671 luciferase-like monooxygenase
238293	T	0.1725	C	0.1647	BLOCK_17#	SPN23F02550 237622 238671 luciferase-like monooxygenase
238468	T	0.325	C	5.068	BLOCK_17#	SPN23F02550 237622 238671 luciferase-like monooxygenase
239416	A	0.272	G	4.351	BLOCK_18#	SPN23F02560 238771 242568 putative surface-anchored pullulanase
239497	G	0.476	A	0.1409	BLOCK_18#	SPN23F02560 238771 242568 putative surface-anchored pullulanase
239629	G	0.4876	A	0.2222	BLOCK_18#	SPN23F02560 238771 242568 putative surface-anchored pullulanase
239632	A	0.3416	G	6.561	BLOCK_18#	SPN23F02560 238771 242568 putative surface-anchored pullulanase
239647	G	0.3449	A	7.039	BLOCK_18#	SPN23F02560 238771 242568 putative surface-anchored pullulanase
239695	T	0.08624	C	0	BLOCK_18#	SPN23F02560 238771 242568 putative surface-anchored pullulanase
239875	T	0.09287	C	5.189	BLOCK_18#	SPN23F02560 238771 242568 putative surface-anchored pullulanase
240151	C	0.1078	T	3.411	BLOCK_19#	SPN23F02560 238771 242568 putative surface-anchored pullulanase
240259	C	0.08955	G	5.808	BLOCK_19#	SPN23F02560 238771 242568 putative surface-anchored pullulanase
240319	A	0.1277	G	6.147	DISCRETE	SPN23F02560 238771 242568 putative surface-anchored pullulanase
240367	T	0.1774	C	0.2542	BLOCK_20#	SPN23F02560 238771 242568 putative surface-anchored pullulanase
240645	T	0.08624	C	0	BLOCK_20#	SPN23F02560 238771 242568 putative surface-anchored pullulanase
241456	A	0.06633	G	NA	BLOCK_21#	SPN23F02560 238771 242568 putative surface-anchored pullulanase
242658	C	0.1393	T	6.185	BLOCK_21#	intergenic
243248	G	0.08955	A	0.01098	BLOCK_22#	SPN23F02570 242985 243398 30S ribosomal protein S12
243819	T	0.3284	A	4.405	BLOCK_22#	SPN23F02580 243418 243888 30S ribosomal protein S7
243914	A	0.05473	G	44.8	BLOCK_23#	intergenic
244019	C	0.2985	A	4.642	BLOCK_23#	intergenic
244066	T	0.1161	C	12.56	DISCRETE	intergenic
244778	G	0.08624	A	0.01132	BLOCK_24#	SPN23F02590 244283 246364 elongation factor G (EF-G)
245758	C	0.1658	T	6.265	BLOCK_24#	SPN23F02590 244283 246364 elongation factor G (EF-G)
245806	A	0.3947	G	4.27	BLOCK_24#	SPN23F02590 244283 246364 elongation factor G (EF-G)
261883	A	0.02156	G	70.47	DISCRETE	SPN23F02750 261538 262350 putative haloacid dehalogenase-like hydrolase
261889	T	0.02322	C	31.26	DISCRETE	SPN23F02750 261538 262350 putative haloacid dehalogenase-like hydrolase
262021	G	0.0199	A	NA	DISCRETE	SPN23F02750 261538 262350 putative haloacid dehalogenase-like hydrolase
262272	C	0.05473	T	25.07	DISCRETE	SPN23F02750 261538 262350 putative haloacid dehalogenase-like hydrolase
262352	G	0.05307	T	7.476	BLOCK_25#	intergenic
262368	C	0.08292	G	6.54	BLOCK_25#	intergenic
262387	A	0.03814	T	9.897	DISCRETE	intergenic
262445	C	0.0995	T	5.393	BLOCK_25#	intergenic
262539	A	0.0995	G	5.393	BLOCK_25#	intergenic
262740	C	0.06136	T	6.913	DISCRETE	SPN23F02760 262540 263958 putative permease
262743	C	0.05638	T	7.941	DISCRETE	SPN23F02760 262540 263958 putative permease
263631	G	0.08624	A	9.69	BLOCK_26#	SPN23F02760 262540 263958 putative permease
263634	A	0.09784	T	7.922	BLOCK_26#	SPN23F02760 262540 263958 putative permease
263649	C	0.07794	T	9.315	DISCRETE	SPN23F02760 262540 263958 putative permease
263679	T	0.06965	C	8.865	BLOCK_27#	SPN23F02760 262540 263958 putative permease
263784	T	0.1078	C	6.565	BLOCK_27#	SPN23F02760 262540 263958 putative permease
263885	C	0.1111	T	6.862	BLOCK_27#	SPN23F02760 262540 263958 putative permease
264601	T	0.1625	C	7.314	BLOCK_27#	SPN23F02770 264011 264718 putative CAAX amino terminal protease family membrane protein
264628	T	0.1857	G	6.684	BLOCK_27#	SPN23F02770 264011 264718 putative CAAX amino terminal protease family membrane protein
264811	G	0.1426	A	6.022	DISCRETE	SPN23F02780 264808 265785 dihydropteroate synthase
264818	G	0.2637	T	3.894	BLOCK_28#	SPN23F02780 264808 265785 dihydropteroate synthase
264869	C	0.3449	T	4.997	BLOCK_28#	SPN23F02780 264808 265785 dihydropteroate synthase
264978	T	0.1575	C	5.625	BLOCK_28#	SPN23F02780 264808 265785 dihydropteroate synthase
264987	A	0.3035	C	5.588	DISCRETE	SPN23F02780 264808 265785 dihydropteroate synthase
265159	A	0.408	G	4.056	BLOCK_29#	SPN23F02780 264808 265785 dihydropteroate synthase
265242	T	0.1294	C	7.186	BLOCK_29#	SPN23F02780 264808 265785 dihydropteroate synthase
265293	T	0.126	C	6.081	DISCRETE	SPN23F02780 264808 265785 dihydropteroate synthase
265375	A	0.136	G	5.714	DISCRETE	SPN23F02780 264808 265785 dihydropteroate synthase
265404	A	0.1725	G	6.54	BLOCK_30#	SPN23F02780 264808 265785 dihydropteroate synthase
265406	A	0.209	C	6.033	BLOCK_30#	SPN23F02780 264808 265785 dihydropteroate synthase
265608	A	0.2007	G	5.315	BLOCK_30#	SPN23F02780 264808 265785 dihydropteroate synthase
265629	T	0.1028	C	8.217	BLOCK_30#	SPN23F02780 264808 265785 dihydropteroate synthase
265910	A	0.1874	C	4.812	BLOCK_31#	SPN23F02790 265787 267109 putative putative folylpolyglutamate synthase
266755	A	0.1476	G	5.658	BLOCK_31#	SPN23F02790 265787 267109 putative putative folylpolyglutamate synthase
266760	C	0.1476	T	5.658	BLOCK_31#	SPN23F02790 265787 267109 putative putative folylpolyglutamate synthase
266776	C	0.1393	T	5.598	BLOCK_31#	SPN23F02790 265787 267109 putative putative folylpolyglutamate synthase
267350	T	0.08292	C	7.305	BLOCK_31#	SPN23F02800 267090 267644 GTP cyclohydrolase I
267359	T	0.05141	C	12.96	BLOCK_31#	SPN23F02800 267090 267644 GTP cyclohydrolase I
267383	T	0.08126	C	7.04	BLOCK_31#	SPN23F02800 267090 267644 GTP cyclohydrolase I
267545	C	0.0796	T	5.544	BLOCK_31#	SPN23F02800 267090 267644 GTP cyclohydrolase I
267620	G	0.03648	A	13.6	DISCRETE	SPN23F02800 267090 267644 GTP cyclohydrolase I
267638	A	0.0398	G	12.85	DISCRETE	SPN23F02800 267090 267644 GTP cyclohydrolase I
267775	G	0.04975	A	37.2	DISCRETE	intergenic
267776	G	0.04975	A	37.2	DISCRETE	intergenic
267835	T	0.0597	G	39.66	BLOCK_32#	SPN23F02810 267803 268615 putative 2-amino-4-hydroxy-6-hydroxymethyldihydropteridine pyrophosphokinase
267868	G	0.02985	A	90.36	DISCRETE	SPN23F02810 267803 268615 putative 2-amino-4-hydroxy-6-hydroxymethyldihydropteridine pyrophosphokinase
267880	A	0.01161	G	46.1	DISCRETE	SPN23F02810 267803 268615 putative 2-amino-4-hydroxy-6-hydroxymethyldihydropteridine pyrophosphokinase
267883	G	0.04809	A	13.44	DISCRETE	SPN23F02810 267803 268615 putative 2-amino-4-hydroxy-6-hydroxymethyldihydropteridine pyrophosphokinase
267925	G	0.05473	A	14.23	BLOCK_32#	SPN23F02810 267803 268615 putative 2-amino-4-hydroxy-6-hydroxymethyldihydropteridine pyrophosphokinase
268033	C	0.04643	T	11.92	DISCRETE	SPN23F02810 267803 268615 putative 2-amino-4-hydroxy-6-hydroxymethyldihydropteridine pyrophosphokinase
268042	A	0.04643	G	11.92	DISCRETE	SPN23F02810 267803 268615 putative 2-amino-4-hydroxy-6-hydroxymethyldihydropteridine pyrophosphokinase
268121	C	0.05473	T	14.23	BLOCK_32#	SPN23F02810 267803 268615 putative 2-amino-4-hydroxy-6-hydroxymethyldihydropteridine pyrophosphokinase
268297	T	0.06965	A	9.14	BLOCK_32#	SPN23F02810 267803 268615 putative 2-amino-4-hydroxy-6-hydroxymethyldihydropteridine pyrophosphokinase
268346	T	0.06799	C	12.12	BLOCK_32#	SPN23F02810 267803 268615 putative 2-amino-4-hydroxy-6-hydroxymethyldihydropteridine pyrophosphokinase
268348	G	0.06799	A	12.12	BLOCK_32#	SPN23F02810 267803 268615 putative 2-amino-4-hydroxy-6-hydroxymethyldihydropteridine pyrophosphokinase
268356	C	0.05473	A	14.23	BLOCK_32#	SPN23F02810 267803 268615 putative 2-amino-4-hydroxy-6-hydroxymethyldihydropteridine pyrophosphokinase
268359	T	0.06965	A	13.06	BLOCK_33#	SPN23F02810 267803 268615 putative 2-amino-4-hydroxy-6-hydroxymethyldihydropteridine pyrophosphokinase
268361	C	0.06136	T	12.57	BLOCK_33#	SPN23F02810 267803 268615 putative 2-amino-4-hydroxy-6-hydroxymethyldihydropteridine pyrophosphokinase
268363	A	0.06136	G	12.57	BLOCK_33#	SPN23F02810 267803 268615 putative 2-amino-4-hydroxy-6-hydroxymethyldihydropteridine pyrophosphokinase
268394	A	0.05473	C	14.23	DISCRETE	SPN23F02810 267803 268615 putative 2-amino-4-hydroxy-6-hydroxymethyldihydropteridine pyrophosphokinase
268486	T	0.04643	C	11.92	DISCRETE	SPN23F02810 267803 268615 putative 2-amino-4-hydroxy-6-hydroxymethyldihydropteridine pyrophosphokinase
270409	A	0.08789	G	22.9	BLOCK_34#	intergenic
270414	C	0.08789	T	22.9	BLOCK_34#	intergenic
270704	C	0.141	T	18.33	BLOCK_34#	SPN23F02850 270452 270874 degenerate integrase
270707	G	0.141	A	18.33	BLOCK_34#	SPN23F02850 270452 270874 degenerate integrase
270713	G	0.141	A	18.33	BLOCK_34#	SPN23F02850 270452 270874 degenerate integrase
270716	T	0.141	G	18.33	BLOCK_34#	SPN23F02850 270452 270874 degenerate integrase
270722	T	0.141	G	18.33	BLOCK_34#	SPN23F02850 270452 270874 degenerate integrase
270725	G	0.1376	A	21.28	BLOCK_34#	SPN23F02850 270452 270874 degenerate integrase
270728	G	0.1376	T	21.28	BLOCK_34#	SPN23F02850 270452 270874 degenerate integrase
270731	A	0.141	G	18.33	BLOCK_34#	SPN23F02850 270452 270874 degenerate integrase
270734	T	0.141	A	18.33	BLOCK_34#	SPN23F02850 270452 270874 degenerate integrase
270740	A	0.1376	G	21.28	BLOCK_34#	SPN23F02850 270452 270874 degenerate integrase
270742	C	0.141	T	18.33	BLOCK_34#	SPN23F02850 270452 270874 degenerate integrase
270743	A	0.141	G	18.33	BLOCK_34#	SPN23F02850 270452 270874 degenerate integrase
270767	G	0.1343	A	24.22	BLOCK_34#	SPN23F02850 270452 270874 degenerate integrase
270789	C	0.1211	T	16.47	DISCRETE	SPN23F02850 270452 270874 degenerate integrase
271004	A	0.01161	T	NA	DISCRETE	intergenic
271063	G	0.01161	A	NA	DISCRETE	SPN23F02860 271021 271197 hypothetical protein
271192	G	0.01161	A	NA	DISCRETE	SPN23F02860 271021 271197 hypothetical protein
271205	T	0.01161	C	NA	DISCRETE	intergenic
271208	A	0.01161	C	NA	DISCRETE	intergenic
271239	A	0.01161	G	NA	DISCRETE	intergenic
271649	T	0.01493	C	NA	DISCRETE	SPN23F02870 271598 273811 putative glycosylhydrolase
272056	C	0.0995	G	8.393	DISCRETE	SPN23F02870 271598 273811 putative glycosylhydrolase
272167	G	0.03648	A	20.91	DISCRETE	SPN23F02870 271598 273811 putative glycosylhydrolase
272543	A	0.03483	G	20.91	DISCRETE	SPN23F02870 271598 273811 putative glycosylhydrolase
272737	C	0.01161	T	NA	DISCRETE	SPN23F02870 271598 273811 putative glycosylhydrolase
272770	T	0.1658	C	4.348	BLOCK_35#	SPN23F02870 271598 273811 putative glycosylhydrolase
272837	C	0.1841	T	4.348	BLOCK_35#	SPN23F02870 271598 273811 putative glycosylhydrolase
273419	A	0.05638	C	10.14	BLOCK_36#	SPN23F02870 271598 273811 putative glycosylhydrolase
273724	T	0.05804	C	10.14	BLOCK_36#	SPN23F02870 271598 273811 putative glycosylhydrolase
274380	T	0.09121	C	0.07822	DISCRETE	SPN23F02880 274033 274509 putative glutathione peroxidase
278095	A	0.1973	G	6.388	DISCRETE	intergenic
278224	A	0.1708	G	4.333	DISCRETE	intergenic
278843	T	0.09453	G	32.7	BLOCK_37#	intergenic
280096	G	0.1857	A	9.273	BLOCK_37#	SPN23F02920 279718 280719 PfkB family carbohydrate kinase
282757	T	0.1841	C	15.49	DISCRETE	SPN23F02950 282497 282931 putative N-acetylgalactosamine-specific phosphotransferase system (PTS), IIA component
286668	A	0.1211	G	11	BLOCK_38#	SPN23F03010 286549 288450 heparinase II/III-like protein
286854	C	0.1393	T	12.66	BLOCK_38#	SPN23F03010 286549 288450 heparinase II/III-like protein
287904	A	0.4959	G	0.206	DISCRETE	SPN23F03010 286549 288450 heparinase II/III-like protein
290439	G	0.2786	A	5.827	DISCRETE	intergenic
290803	A	0.05473	G	16	DISCRETE	SPN23F03060 290585 291535 S-adenosyl-methyltransferase MraW
291022	C	0.1907	T	12.16	DISCRETE	SPN23F03060 290585 291535 S-adenosyl-methyltransferase MraW
291103	A	0.1592	G	39.42	DISCRETE	SPN23F03060 290585 291535 S-adenosyl-methyltransferase MraW
291118	C	0.1542	G	23.65	DISCRETE	SPN23F03060 290585 291535 S-adenosyl-methyltransferase MraW
291127	C	0.1542	T	27.29	BLOCK_39#	SPN23F03060 290585 291535 S-adenosyl-methyltransferase MraW
291133	T	0.1376	A	35.32	BLOCK_39#	SPN23F03060 290585 291535 S-adenosyl-methyltransferase MraW
291142	A	0.1277	G	54.05	BLOCK_39#	SPN23F03060 290585 291535 S-adenosyl-methyltransferase MraW
291145	G	0.1194	A	39.26	BLOCK_39#	SPN23F03060 290585 291535 S-adenosyl-methyltransferase MraW
291151	A	0.1128	G	34.7	BLOCK_39#	SPN23F03060 290585 291535 S-adenosyl-methyltransferase MraW
291162	C	0.1758	T	34.04	BLOCK_40#	SPN23F03060 290585 291535 S-adenosyl-methyltransferase MraW
291165	C	0.1758	T	34.04	BLOCK_40#	SPN23F03060 290585 291535 S-adenosyl-methyltransferase MraW
291181	G	0.1343	A	102.4	BLOCK_40#	SPN23F03060 290585 291535 S-adenosyl-methyltransferase MraW
291205	C	0.1144	T	40.56	BLOCK_40#	SPN23F03060 290585 291535 S-adenosyl-methyltransferase MraW
291208	A	0.09287	G	53.66	BLOCK_40#	SPN23F03060 290585 291535 S-adenosyl-methyltransferase MraW
291214	C	0.09287	T	53.66	BLOCK_40#	SPN23F03060 290585 291535 S-adenosyl-methyltransferase MraW
291229	G	0.09287	A	53.66	BLOCK_40#	SPN23F03060 290585 291535 S-adenosyl-methyltransferase MraW
291238	T	0.1128	C	13.11	BLOCK_40#	SPN23F03060 290585 291535 S-adenosyl-methyltransferase MraW
291241	C	0.0995	T	55.76	BLOCK_40#	SPN23F03060 290585 291535 S-adenosyl-methyltransferase MraW
291247	G	0.1061	A	63.89	BLOCK_40#	SPN23F03060 290585 291535 S-adenosyl-methyltransferase MraW
291268	T	0.0995	C	61.78	BLOCK_40#	SPN23F03060 290585 291535 S-adenosyl-methyltransferase MraW
291286	G	0.1393	T	21.79	BLOCK_40#	SPN23F03060 290585 291535 S-adenosyl-methyltransferase MraW
291334	G	0.1211	A	20.34	BLOCK_40#	SPN23F03060 290585 291535 S-adenosyl-methyltransferase MraW
291352	A	0.09121	G	51.76	BLOCK_40#	SPN23F03060 290585 291535 S-adenosyl-methyltransferase MraW
291355	G	0.09619	A	59.1	BLOCK_40#	SPN23F03060 290585 291535 S-adenosyl-methyltransferase MraW
291358	A	0.1177	G	61.21	DISCRETE	SPN23F03060 290585 291535 S-adenosyl-methyltransferase MraW
291376	G	0.126	A	26.56	BLOCK_41#	SPN23F03060 290585 291535 S-adenosyl-methyltransferase MraW
291388	C	0.1327	A	23.47	BLOCK_41#	SPN23F03060 290585 291535 S-adenosyl-methyltransferase MraW
291394	T	0.1426	C	24.93	BLOCK_41#	SPN23F03060 290585 291535 S-adenosyl-methyltransferase MraW
291400	C	0.02819	T	NA	DISCRETE	SPN23F03060 290585 291535 S-adenosyl-methyltransferase MraW
291420	G	0.09121	A	51.76	BLOCK_42#	SPN23F03060 290585 291535 S-adenosyl-methyltransferase MraW
291466	A	0.199	G	34.16	BLOCK_42#	SPN23F03060 290585 291535 S-adenosyl-methyltransferase MraW
291472	A	0.1857	G	32.45	BLOCK_42#	SPN23F03060 290585 291535 S-adenosyl-methyltransferase MraW
291540	A	0.1542	G	31.76	BLOCK_42#	intergenic
291557	G	0.2023	A	30.79	BLOCK_42#	SPN23F03070 291547 291864 putative cell division protein
291660	A	0.1128	C	55.83	BLOCK_42#	SPN23F03070 291547 291864 putative cell division protein
291699	A	0.1194	G	68.75	BLOCK_42#	SPN23F03070 291547 291864 putative cell division protein
291850	C	0.2156	A	41.23	BLOCK_42#	SPN23F03070 291547 291864 putative cell division protein
291982	G	0.2139	A	48.67	BLOCK_42#	SPN23F03080 291868 294120 putative penicillin binding protein 2x
292134	A	0.1327	G	36.97	BLOCK_43#	SPN23F03080 291868 294120 putative penicillin binding protein 2x
292137	C	0.02819	T	NA	DISCRETE	SPN23F03080 291868 294120 putative penicillin binding protein 2x
292140	G	0.1658	A	32.43	BLOCK_43#	SPN23F03080 291868 294120 putative penicillin binding protein 2x
292146	T	0.1907	C	12.48	BLOCK_43#	SPN23F03080 291868 294120 putative penicillin binding protein 2x
292161	T	0.02985	G	NA	DISCRETE	SPN23F03080 291868 294120 putative penicillin binding protein 2x
292171	A	0.02985	G	NA	DISCRETE	SPN23F03080 291868 294120 putative penicillin binding protein 2x
292173	A	0.02985	G	NA	DISCRETE	SPN23F03080 291868 294120 putative penicillin binding protein 2x
292179	C	0.02985	T	NA	DISCRETE	SPN23F03080 291868 294120 putative penicillin binding protein 2x
292182	A	0.02985	G	NA	DISCRETE	SPN23F03080 291868 294120 putative penicillin binding protein 2x
292197	A	0.02985	G	NA	DISCRETE	SPN23F03080 291868 294120 putative penicillin binding protein 2x
292206	T	0.02985	C	NA	DISCRETE	SPN23F03080 291868 294120 putative penicillin binding protein 2x
292213	G	0.02985	A	NA	DISCRETE	SPN23F03080 291868 294120 putative penicillin binding protein 2x
292215	T	0.02985	A	NA	DISCRETE	SPN23F03080 291868 294120 putative penicillin binding protein 2x
292216	G	0.02985	A	NA	DISCRETE	SPN23F03080 291868 294120 putative penicillin binding protein 2x
292221	G	0.02985	A	NA	DISCRETE	SPN23F03080 291868 294120 putative penicillin binding protein 2x
292227	T	0.02819	C	NA	DISCRETE	SPN23F03080 291868 294120 putative penicillin binding protein 2x
292242	T	0.02819	C	NA	DISCRETE	SPN23F03080 291868 294120 putative penicillin binding protein 2x
292245	C	0.02819	T	NA	DISCRETE	SPN23F03080 291868 294120 putative penicillin binding protein 2x
292260	T	0.04809	C	NA	DISCRETE	SPN23F03080 291868 294120 putative penicillin binding protein 2x
292269	G	0.04643	A	NA	DISCRETE	SPN23F03080 291868 294120 putative penicillin binding protein 2x
292270	G	0.04643	T	NA	DISCRETE	SPN23F03080 291868 294120 putative penicillin binding protein 2x
292284	A	0.04643	G	NA	DISCRETE	SPN23F03080 291868 294120 putative penicillin binding protein 2x
292288	T	0.04643	C	NA	DISCRETE	SPN23F03080 291868 294120 putative penicillin binding protein 2x
292293	T	0.04643	G	NA	DISCRETE	SPN23F03080 291868 294120 putative penicillin binding protein 2x
292305	G	0.04643	C	NA	DISCRETE	SPN23F03080 291868 294120 putative penicillin binding protein 2x
292307	C	0.04643	A	NA	DISCRETE	SPN23F03080 291868 294120 putative penicillin binding protein 2x
292323	T	0.1244	A	23.31	DISCRETE	SPN23F03080 291868 294120 putative penicillin binding protein 2x
292329	A	0.04643	G	NA	DISCRETE	SPN23F03080 291868 294120 putative penicillin binding protein 2x
292338	A	0.04643	G	NA	DISCRETE	SPN23F03080 291868 294120 putative penicillin binding protein 2x
292381	A	0.3648	G	88.75	DISCRETE	SPN23F03080 291868 294120 putative penicillin binding protein 2x
292419	T	0.08126	C	NA	DISCRETE	SPN23F03080 291868 294120 putative penicillin binding protein 2x
292431	T	0.08789	C	28.99	DISCRETE	SPN23F03080 291868 294120 putative penicillin binding protein 2x
292503	T	0.1824	C	27.99	DISCRETE	SPN23F03080 291868 294120 putative penicillin binding protein 2x
292515	T	0.136	C	23.86	DISCRETE	SPN23F03080 291868 294120 putative penicillin binding protein 2x
292563	T	0.2289	C	22.54	BLOCK_44#	SPN23F03080 291868 294120 putative penicillin binding protein 2x
292581	A	0.1642	G	31.59	BLOCK_44#	SPN23F03080 291868 294120 putative penicillin binding protein 2x
292602	C	0.2322	A	60.21	BLOCK_45#	SPN23F03080 291868 294120 putative penicillin binding protein 2x
292618	A	0.1028	G	45.44	BLOCK_45#	SPN23F03080 291868 294120 putative penicillin binding protein 2x
292628	A	0.3781	G	88.75	BLOCK_45#	SPN23F03080 291868 294120 putative penicillin binding protein 2x
292633	G	0.3748	A	77.95	BLOCK_45#	SPN23F03080 291868 294120 putative penicillin binding protein 2x
292635	A	0.1244	G	36.94	DISCRETE	SPN23F03080 291868 294120 putative penicillin binding protein 2x
292638	C	0.4428	T	0.07461	BLOCK_46#	SPN23F03080 291868 294120 putative penicillin binding protein 2x
292641	C	0.2305	T	57.35	BLOCK_46#	SPN23F03080 291868 294120 putative penicillin binding protein 2x
292653	C	0.06633	T	126.9	BLOCK_46#	SPN23F03080 291868 294120 putative penicillin binding protein 2x
292665	T	0.1692	C	NA	BLOCK_46#	SPN23F03080 291868 294120 putative penicillin binding protein 2x
292668	T	0.1675	C	NA	BLOCK_46#	SPN23F03080 291868 294120 putative penicillin binding protein 2x
292677	A	0.1692	G	95.13	BLOCK_46#	SPN23F03080 291868 294120 putative penicillin binding protein 2x
292680	T	0.1675	C	NA	BLOCK_46#	SPN23F03080 291868 294120 putative penicillin binding protein 2x
292683	C	0.2255	T	52.55	BLOCK_46#	SPN23F03080 291868 294120 putative penicillin binding protein 2x
292704	C	0.2338	T	69.58	BLOCK_46#	SPN23F03080 291868 294120 putative penicillin binding protein 2x
292709	T	0.1774	A	146.4	BLOCK_47#	SPN23F03080 291868 294120 putative penicillin binding protein 2x
292776	T	0.2803	A	110.5	BLOCK_47#	SPN23F03080 291868 294120 putative penicillin binding protein 2x
292788	G	0.05141	A	225.5	DISCRETE	SPN23F03080 291868 294120 putative penicillin binding protein 2x
292798	A	0.2803	G	110.5	BLOCK_47#	SPN23F03080 291868 294120 putative penicillin binding protein 2x
292809	T	0.3433	A	112.7	BLOCK_47#	SPN23F03080 291868 294120 putative penicillin binding protein 2x
292812	G	0.06302	A	21.65	BLOCK_48#	SPN23F03080 291868 294120 putative penicillin binding protein 2x
292825	A	0.1658	G	35.54	BLOCK_48#	SPN23F03080 291868 294120 putative penicillin binding protein 2x
292848	T	0.1824	C	143.8	BLOCK_49#	SPN23F03080 291868 294120 putative penicillin binding protein 2x
292854	T	0.3516	C	113.1	BLOCK_49#	SPN23F03080 291868 294120 putative penicillin binding protein 2x
292869	A	0.3035	G	74.73	BLOCK_49#	SPN23F03080 291868 294120 putative penicillin binding protein 2x
292878	A	0.34	C	113.3	BLOCK_49#	SPN23F03080 291868 294120 putative penicillin binding protein 2x
292879	G	0.2919	A	129.2	BLOCK_49#	SPN23F03080 291868 294120 putative penicillin binding protein 2x
292881	C	0.34	T	113.3	BLOCK_49#	SPN23F03080 291868 294120 putative penicillin binding protein 2x
292887	G	0.34	A	113.3	BLOCK_49#	SPN23F03080 291868 294120 putative penicillin binding protein 2x
292895	C	0.33	T	102.5	BLOCK_49#	SPN23F03080 291868 294120 putative penicillin binding protein 2x
292897	C	0.05804	T	57.39	BLOCK_49#	SPN23F03080 291868 294120 putative penicillin binding protein 2x
292903	T	0.1791	G	163.7	BLOCK_49#	SPN23F03080 291868 294120 putative penicillin binding protein 2x
292906	T	0.2836	G	118.1	BLOCK_49#	SPN23F03080 291868 294120 putative penicillin binding protein 2x
292917	C	0.1045	T	46.02	BLOCK_49#	SPN23F03080 291868 294120 putative penicillin binding protein 2x
292920	C	0.05473	T	43.94	DISCRETE	SPN23F03080 291868 294120 putative penicillin binding protein 2x
292923	T	0.05473	C	43.94	DISCRETE	SPN23F03080 291868 294120 putative penicillin binding protein 2x
292926	C	0.3483	T	119.4	BLOCK_49#	SPN23F03080 291868 294120 putative penicillin binding protein 2x
292930	A	0.1907	G	188.4	BLOCK_49#	SPN23F03080 291868 294120 putative penicillin binding protein 2x
292932	T	0.2952	A	126.8	BLOCK_49#	SPN23F03080 291868 294120 putative penicillin binding protein 2x
292939	T	0.2952	G	126.8	BLOCK_49#	SPN23F03080 291868 294120 putative penicillin binding protein 2x
292940	A	0.2952	T	126.8	BLOCK_49#	SPN23F03080 291868 294120 putative penicillin binding protein 2x
292941	T	0.1559	C	44.49	DISCRETE	SPN23F03080 291868 294120 putative penicillin binding protein 2x
292944	C	0.3847	T	93.57	BLOCK_50#	SPN23F03080 291868 294120 putative penicillin binding protein 2x
292950	C	0.2968	T	126.8	BLOCK_50#	SPN23F03080 291868 294120 putative penicillin binding protein 2x
292956	A	0.3151	G	133	BLOCK_50#	SPN23F03080 291868 294120 putative penicillin binding protein 2x
292965	A	0.3499	T	87.65	BLOCK_50#	SPN23F03080 291868 294120 putative penicillin binding protein 2x
292968	G	0.3184	A	106.9	BLOCK_50#	SPN23F03080 291868 294120 putative penicillin binding protein 2x
292973	T	0.1277	C	42.36	BLOCK_50#	SPN23F03080 291868 294120 putative penicillin binding protein 2x
292979	C	0.1791	T	163.7	BLOCK_51#	SPN23F03080 291868 294120 putative penicillin binding protein 2x
292980	C	0.1294	T	27.65	BLOCK_51#	SPN23F03080 291868 294120 putative penicillin binding protein 2x
293043	C	0.2471	T	133.1	BLOCK_51#	SPN23F03080 291868 294120 putative penicillin binding protein 2x
293052	C	0.2139	A	113.9	BLOCK_51#	SPN23F03080 291868 294120 putative penicillin binding protein 2x
293058	T	0.2172	C	54.47	BLOCK_51#	SPN23F03080 291868 294120 putative penicillin binding protein 2x
293064	A	0.2139	G	113.9	BLOCK_51#	SPN23F03080 291868 294120 putative penicillin binding protein 2x
293079	A	0.2139	G	113.9	BLOCK_51#	SPN23F03080 291868 294120 putative penicillin binding protein 2x
293085	A	0.2139	G	113.9	BLOCK_51#	SPN23F03080 291868 294120 putative penicillin binding protein 2x
293104	T	0.2189	C	225.7	DISCRETE	SPN23F03080 291868 294120 putative penicillin binding protein 2x
293106	G	0.2222	T	74.57	BLOCK_52#	SPN23F03080 291868 294120 putative penicillin binding protein 2x
293121	C	0.3499	T	62.23	BLOCK_52#	SPN23F03080 291868 294120 putative penicillin binding protein 2x
293163	A	0.204	G	36.04	BLOCK_52#	SPN23F03080 291868 294120 putative penicillin binding protein 2x
293166	C	0.1808	T	163.7	BLOCK_52#	SPN23F03080 291868 294120 putative penicillin binding protein 2x
293175	A	0.272	G	32.2	BLOCK_52#	SPN23F03080 291868 294120 putative penicillin binding protein 2x
293198	G	0.1774	A	NA	BLOCK_52#	SPN23F03080 291868 294120 putative penicillin binding protein 2x
293199	T	0.2537	C	54.78	BLOCK_52#	SPN23F03080 291868 294120 putative penicillin binding protein 2x
293205	T	0.199	G	84.25	BLOCK_52#	SPN23F03080 291868 294120 putative penicillin binding protein 2x
293226	A	0.1857	G	NA	BLOCK_52#	SPN23F03080 291868 294120 putative penicillin binding protein 2x
293241	A	0.2007	G	99.63	BLOCK_52#	SPN23F03080 291868 294120 putative penicillin binding protein 2x
293251	C	0.2073	A	52.55	BLOCK_52#	SPN23F03080 291868 294120 putative penicillin binding protein 2x
293280	T	0.2454	C	82.84	BLOCK_52#	SPN23F03080 291868 294120 putative penicillin binding protein 2x
293286	T	0.2123	C	246.4	BLOCK_52#	SPN23F03080 291868 294120 putative penicillin binding protein 2x
293298	A	0.1808	T	NA	BLOCK_52#	SPN23F03080 291868 294120 putative penicillin binding protein 2x
293313	T	0.1808	C	NA	BLOCK_52#	SPN23F03080 291868 294120 putative penicillin binding protein 2x
293323	A	0.1808	C	NA	BLOCK_52#	SPN23F03080 291868 294120 putative penicillin binding protein 2x
293325	T	0.1808	A	NA	BLOCK_52#	SPN23F03080 291868 294120 putative penicillin binding protein 2x
293328	C	0.1808	T	NA	BLOCK_52#	SPN23F03080 291868 294120 putative penicillin binding protein 2x
293329	A	0.1824	G	NA	BLOCK_52#	SPN23F03080 291868 294120 putative penicillin binding protein 2x
293334	G	0.1808	A	NA	BLOCK_52#	SPN23F03080 291868 294120 putative penicillin binding protein 2x
293335	T	0.1907	A	NA	BLOCK_52#	SPN23F03080 291868 294120 putative penicillin binding protein 2x
293339	T	0.1907	C	NA	BLOCK_52#	SPN23F03080 291868 294120 putative penicillin binding protein 2x
293340	A	0.1808	T	NA	BLOCK_52#	SPN23F03080 291868 294120 putative penicillin binding protein 2x
293346	G	0.1808	A	NA	BLOCK_52#	SPN23F03080 291868 294120 putative penicillin binding protein 2x
293349	A	0.1642	T	NA	BLOCK_52#	SPN23F03080 291868 294120 putative penicillin binding protein 2x
293361	A	0.1692	T	NA	BLOCK_52#	SPN23F03080 291868 294120 putative penicillin binding protein 2x
293394	C	0.2189	T	27.5	BLOCK_52#	SPN23F03080 291868 294120 putative penicillin binding protein 2x
293405	A	0.1708	C	NA	BLOCK_52#	SPN23F03080 291868 294120 putative penicillin binding protein 2x
293407	C	0.2106	A	22.66	BLOCK_52#	SPN23F03080 291868 294120 putative penicillin binding protein 2x
293413	A	0.2123	G	NA	BLOCK_52#	SPN23F03080 291868 294120 putative penicillin binding protein 2x
293418	A	0.209	G	637.8	BLOCK_52#	SPN23F03080 291868 294120 putative penicillin binding protein 2x
293577	T	0.1028	C	45.44	BLOCK_52#	SPN23F03080 291868 294120 putative penicillin binding protein 2x
293580	A	0.2488	G	43.69	BLOCK_52#	SPN23F03080 291868 294120 putative penicillin binding protein 2x
293586	G	0.2172	A	9.366	BLOCK_52#	SPN23F03080 291868 294120 putative penicillin binding protein 2x
293594	A	0.2952	G	67.16	BLOCK_52#	SPN23F03080 291868 294120 putative penicillin binding protein 2x
293628	A	0.2189	G	95.29	BLOCK_52#	SPN23F03080 291868 294120 putative penicillin binding protein 2x
293640	G	0.1874	A	91.52	BLOCK_52#	SPN23F03080 291868 294120 putative penicillin binding protein 2x
293646	G	0.2156	A	96.25	DISCRETE	SPN23F03080 291868 294120 putative penicillin binding protein 2x
293661	C	0.2388	T	53.72	BLOCK_53#	SPN23F03080 291868 294120 putative penicillin binding protein 2x
293681	C	0.2172	A	NA	BLOCK_53#	SPN23F03080 291868 294120 putative penicillin binding protein 2x
293682	C	0.2156	T	93.7	BLOCK_53#	SPN23F03080 291868 294120 putative penicillin binding protein 2x
293685	A	0.2521	T	49.58	BLOCK_53#	SPN23F03080 291868 294120 putative penicillin binding protein 2x
293776	G	0.2405	C	107.7	BLOCK_53#	SPN23F03080 291868 294120 putative penicillin binding protein 2x
293787	C	0.2338	T	58.75	BLOCK_53#	SPN23F03080 291868 294120 putative penicillin binding protein 2x
293788	A	0.2421	G	108.9	BLOCK_53#	SPN23F03080 291868 294120 putative penicillin binding protein 2x
293811	G	0.199	T	93.41	BLOCK_53#	SPN23F03080 291868 294120 putative penicillin binding protein 2x
293814	G	0.2338	A	58.75	BLOCK_53#	SPN23F03080 291868 294120 putative penicillin binding protein 2x
293817	G	0.2338	A	58.75	BLOCK_53#	SPN23F03080 291868 294120 putative penicillin binding protein 2x
293822	C	0.2322	A	58.09	BLOCK_53#	SPN23F03080 291868 294120 putative penicillin binding protein 2x
293823	C	0.2322	A	58.09	BLOCK_53#	SPN23F03080 291868 294120 putative penicillin binding protein 2x
293826	A	0.2322	G	58.09	BLOCK_53#	SPN23F03080 291868 294120 putative penicillin binding protein 2x
293829	C	0.2007	T	93.41	BLOCK_53#	SPN23F03080 291868 294120 putative penicillin binding protein 2x
293832	A	0.2388	C	12.79	BLOCK_53#	SPN23F03080 291868 294120 putative penicillin binding protein 2x
293836	A	0.2322	C	58.09	BLOCK_53#	SPN23F03080 291868 294120 putative penicillin binding protein 2x
293841	G	0.2322	A	58.09	BLOCK_53#	SPN23F03080 291868 294120 putative penicillin binding protein 2x
293850	T	0.1045	C	46.02	BLOCK_53#	SPN23F03080 291868 294120 putative penicillin binding protein 2x
293862	T	0.2189	A	112.2	BLOCK_53#	SPN23F03080 291868 294120 putative penicillin binding protein 2x
293868	A	0.2405	G	107.7	BLOCK_53#	SPN23F03080 291868 294120 putative penicillin binding protein 2x
293995	T	0.4328	C	52.43	BLOCK_53#	SPN23F03080 291868 294120 putative penicillin binding protein 2x
294003	A	0.199	G	93.41	BLOCK_53#	SPN23F03080 291868 294120 putative penicillin binding protein 2x
294007	T	0.2322	C	58.09	BLOCK_53#	SPN23F03080 291868 294120 putative penicillin binding protein 2x
294010	G	0.2007	A	104.3	BLOCK_53#	SPN23F03080 291868 294120 putative penicillin binding protein 2x
294028	G	0.393	C	100.8	BLOCK_53#	SPN23F03080 291868 294120 putative penicillin binding protein 2x
294036	A	0.2123	G	104.3	BLOCK_53#	SPN23F03080 291868 294120 putative penicillin binding protein 2x
294042	C	0.1774	T	22	BLOCK_53#	SPN23F03080 291868 294120 putative penicillin binding protein 2x
294043	G	0.2007	A	104.3	BLOCK_53#	SPN23F03080 291868 294120 putative penicillin binding protein 2x
294044	T	0.2007	C	104.3	BLOCK_53#	SPN23F03080 291868 294120 putative penicillin binding protein 2x
294067	A	0.2007	G	104.3	BLOCK_53#	SPN23F03080 291868 294120 putative penicillin binding protein 2x
294072	T	0.3367	C	73.97	BLOCK_53#	SPN23F03080 291868 294120 putative penicillin binding protein 2x
294084	A	0.1791	G	22.39	BLOCK_53#	SPN23F03080 291868 294120 putative penicillin binding protein 2x
294085	A	0.1791	G	22.39	BLOCK_53#	SPN23F03080 291868 294120 putative penicillin binding protein 2x
294101	A	0.1028	C	19.84	BLOCK_53#	SPN23F03080 291868 294120 putative penicillin binding protein 2x
294133	T	0.1758	C	20.71	BLOCK_53#	SPN23F03090 294122 295102 phospho-N-acetylmuramoyl-pentapeptide-transfera se
294136	T	0.07794	C	NA	DISCRETE	SPN23F03090 294122 295102 phospho-N-acetylmuramoyl-pentapeptide-transfera se
294167	G	0.1095	T	11.88	DISCRETE	SPN23F03090 294122 295102 phospho-N-acetylmuramoyl-pentapeptide-transfera se
294250	C	0.2106	T	16.41	DISCRETE	SPN23F03090 294122 295102 phospho-N-acetylmuramoyl-pentapeptide-transfera se
294284	C	0.06136	T	NA	BLOCK_54#	SPN23F03090 294122 295102 phospho-N-acetylmuramoyl-pentapeptide-transfera se
294286	T	0.06136	G	NA	BLOCK_54#	SPN23F03090 294122 295102 phospho-N-acetylmuramoyl-pentapeptide-transfera se
294293	C	0.0597	T	NA	BLOCK_54#	SPN23F03090 294122 295102 phospho-N-acetylmuramoyl-pentapeptide-transfera se
294299	G	0.2454	A	51.93	BLOCK_54#	SPN23F03090 294122 295102 phospho-N-acetylmuramoyl-pentapeptide-transfera se
294302	G	0.0597	T	NA	BLOCK_54#	SPN23F03090 294122 295102 phospho-N-acetylmuramoyl-pentapeptide-transfera se
294304	A	0.0597	T	NA	BLOCK_54#	SPN23F03090 294122 295102 phospho-N-acetylmuramoyl-pentapeptide-transfera se
294308	G	0.0597	T	NA	BLOCK_54#	SPN23F03090 294122 295102 phospho-N-acetylmuramoyl-pentapeptide-transfera se
294346	G	0.0597	C	NA	BLOCK_54#	SPN23F03090 294122 295102 phospho-N-acetylmuramoyl-pentapeptide-transfera se
294348	C	0.0597	G	NA	BLOCK_54#	SPN23F03090 294122 295102 phospho-N-acetylmuramoyl-pentapeptide-transfera se
294361	T	0.1824	A	13.57	BLOCK_55#	SPN23F03090 294122 295102 phospho-N-acetylmuramoyl-pentapeptide-transfera se
294373	T	0.2023	C	16.57	BLOCK_55#	SPN23F03090 294122 295102 phospho-N-acetylmuramoyl-pentapeptide-transfera se
294397	T	0.04643	C	NA	DISCRETE	SPN23F03090 294122 295102 phospho-N-acetylmuramoyl-pentapeptide-transfera se
294400	T	0.04478	A	NA	DISCRETE	SPN23F03090 294122 295102 phospho-N-acetylmuramoyl-pentapeptide-transfera se
294415	C	0.1476	T	13.16	DISCRETE	SPN23F03090 294122 295102 phospho-N-acetylmuramoyl-pentapeptide-transfera se
294427	C	0.2106	T	13.92	DISCRETE	SPN23F03090 294122 295102 phospho-N-acetylmuramoyl-pentapeptide-transfera se
294433	G	0.06302	A	NA	DISCRETE	SPN23F03090 294122 295102 phospho-N-acetylmuramoyl-pentapeptide-transfera se
294445	C	0.1277	G	21.79	BLOCK_56#	SPN23F03090 294122 295102 phospho-N-acetylmuramoyl-pentapeptide-transfera se
294454	C	0.194	T	71.46	BLOCK_56#	SPN23F03090 294122 295102 phospho-N-acetylmuramoyl-pentapeptide-transfera se
294457	A	0.1625	G	38.69	BLOCK_56#	SPN23F03090 294122 295102 phospho-N-acetylmuramoyl-pentapeptide-transfera se
294460	G	0.1758	A	37.77	DISCRETE	SPN23F03090 294122 295102 phospho-N-acetylmuramoyl-pentapeptide-transfera se
294490	C	0.1824	T	10.61	BLOCK_57#	SPN23F03090 294122 295102 phospho-N-acetylmuramoyl-pentapeptide-transfera se
294493	T	0.1841	C	11.19	BLOCK_57#	SPN23F03090 294122 295102 phospho-N-acetylmuramoyl-pentapeptide-transfera se
294499	C	0.1791	T	12.01	BLOCK_57#	SPN23F03090 294122 295102 phospho-N-acetylmuramoyl-pentapeptide-transfera se
294505	T	0.03317	C	NA	DISCRETE	SPN23F03090 294122 295102 phospho-N-acetylmuramoyl-pentapeptide-transfera se
294544	C	0.09619	T	19.64	DISCRETE	SPN23F03090 294122 295102 phospho-N-acetylmuramoyl-pentapeptide-transfera se
294577	T	0.03814	C	227.4	DISCRETE	SPN23F03090 294122 295102 phospho-N-acetylmuramoyl-pentapeptide-transfera se
294595	T	0.1476	C	27.77	DISCRETE	SPN23F03090 294122 295102 phospho-N-acetylmuramoyl-pentapeptide-transfera se
294607	T	0.06136	C	378	BLOCK_58#	SPN23F03090 294122 295102 phospho-N-acetylmuramoyl-pentapeptide-transfera se
294622	T	0.01493	A	NA	DISCRETE	SPN23F03090 294122 295102 phospho-N-acetylmuramoyl-pentapeptide-transfera se
294629	A	0.2272	G	27.02	BLOCK_58#	SPN23F03090 294122 295102 phospho-N-acetylmuramoyl-pentapeptide-transfera se
294634	T	0.03151	C	38.34	DISCRETE	SPN23F03090 294122 295102 phospho-N-acetylmuramoyl-pentapeptide-transfera se
294638	C	0.1841	T	35.84	BLOCK_59#	SPN23F03090 294122 295102 phospho-N-acetylmuramoyl-pentapeptide-transfera se
294640	G	0.1393	A	19.85	BLOCK_59#	SPN23F03090 294122 295102 phospho-N-acetylmuramoyl-pentapeptide-transfera se
294664	C	0.03151	T	NA	DISCRETE	SPN23F03090 294122 295102 phospho-N-acetylmuramoyl-pentapeptide-transfera se
294748	T	0.09619	C	24.58	DISCRETE	SPN23F03090 294122 295102 phospho-N-acetylmuramoyl-pentapeptide-transfera se
294757	T	0.1476	C	11.9	BLOCK_60#	SPN23F03090 294122 295102 phospho-N-acetylmuramoyl-pentapeptide-transfera se
294758	G	0.2189	A	25.44	BLOCK_60#	SPN23F03090 294122 295102 phospho-N-acetylmuramoyl-pentapeptide-transfera se
294778	T	0.2604	C	5.186	BLOCK_61#	SPN23F03090 294122 295102 phospho-N-acetylmuramoyl-pentapeptide-transfera se
294781	A	0.02488	G	NA	DISCRETE	SPN23F03090 294122 295102 phospho-N-acetylmuramoyl-pentapeptide-transfera se
294824	T	0.1177	C	206.9	BLOCK_61#	SPN23F03090 294122 295102 phospho-N-acetylmuramoyl-pentapeptide-transfera se
294829	C	0.01327	A	NA	DISCRETE	SPN23F03090 294122 295102 phospho-N-acetylmuramoyl-pentapeptide-transfera se
294907	C	0.08789	T	24.87	DISCRETE	SPN23F03090 294122 295102 phospho-N-acetylmuramoyl-pentapeptide-transfera se
294928	T	0.01493	C	NA	DISCRETE	SPN23F03090 294122 295102 phospho-N-acetylmuramoyl-pentapeptide-transfera se
294937	T	0.131	A	21.9	BLOCK_62#	SPN23F03090 294122 295102 phospho-N-acetylmuramoyl-pentapeptide-transfera se
294991	A	0.1542	G	15.18	BLOCK_62#	SPN23F03090 294122 295102 phospho-N-acetylmuramoyl-pentapeptide-transfera se
295064	T	0.1177	G	24.37	BLOCK_62#	SPN23F03090 294122 295102 phospho-N-acetylmuramoyl-pentapeptide-transfera se
295096	A	0.2007	G	10.5	BLOCK_62#	SPN23F03090 294122 295102 phospho-N-acetylmuramoyl-pentapeptide-transfera se
295230	G	0.1426	A	13.29	DISCRETE	intergenic
295426	A	0.09287	G	14.36	DISCRETE	intergenic
295572	G	0.3566	A	0.1365	DISCRETE	intergenic
295623	G	0.4428	A	0.1225	BLOCK_63#	intergenic
295625	C	0.4411	T	3.69	BLOCK_63#	intergenic
295716	C	0.1045	T	11.2	BLOCK_64#	SPN23F03110 295711 297816 putative ATP-dependent protease ATP-binding subunit ClpL
295737	C	0.1095	T	13	BLOCK_64#	SPN23F03110 295711 297816 putative ATP-dependent protease ATP-binding subunit ClpL
295809	G	0.1194	A	15.98	BLOCK_65#	SPN23F03110 295711 297816 putative ATP-dependent protease ATP-binding subunit ClpL
295821	T	0.1194	C	15.98	BLOCK_65#	SPN23F03110 295711 297816 putative ATP-dependent protease ATP-binding subunit ClpL
295857	A	0.1161	G	14.42	BLOCK_65#	SPN23F03110 295711 297816 putative ATP-dependent protease ATP-binding subunit ClpL
295869	G	0.04312	A	14.44	BLOCK_65#	SPN23F03110 295711 297816 putative ATP-dependent protease ATP-binding subunit ClpL
295959	A	0.3615	G	3.813	BLOCK_65#	SPN23F03110 295711 297816 putative ATP-dependent protease ATP-binding subunit ClpL
296034	T	0.02819	C	167.5	DISCRETE	SPN23F03110 295711 297816 putative ATP-dependent protease ATP-binding subunit ClpL
296075	C	0.03151	A	27.86	DISCRETE	SPN23F03110 295711 297816 putative ATP-dependent protease ATP-binding subunit ClpL
296142	A	0.1194	T	15.98	BLOCK_65#	SPN23F03110 295711 297816 putative ATP-dependent protease ATP-binding subunit ClpL
296151	T	0.1177	C	14.96	BLOCK_65#	SPN23F03110 295711 297816 putative ATP-dependent protease ATP-binding subunit ClpL
296229	C	0.1111	T	278.3	DISCRETE	SPN23F03110 295711 297816 putative ATP-dependent protease ATP-binding subunit ClpL
296271	C	0.01161	T	NA	DISCRETE	SPN23F03110 295711 297816 putative ATP-dependent protease ATP-binding subunit ClpL
296334	A	0.09287	T	158.5	BLOCK_66#	SPN23F03110 295711 297816 putative ATP-dependent protease ATP-binding subunit ClpL
296442	A	0.1277	T	28.13	BLOCK_66#	SPN23F03110 295711 297816 putative ATP-dependent protease ATP-binding subunit ClpL
296494	G	0.1343	A	35.02	BLOCK_67#	SPN23F03110 295711 297816 putative ATP-dependent protease ATP-binding subunit ClpL
296550	T	0.01493	C	NA	DISCRETE	SPN23F03110 295711 297816 putative ATP-dependent protease ATP-binding subunit ClpL
296706	T	0.1343	A	35.02	BLOCK_67#	SPN23F03110 295711 297816 putative ATP-dependent protease ATP-binding subunit ClpL
296715	G	0.05638	A	31.73	BLOCK_67#	SPN23F03110 295711 297816 putative ATP-dependent protease ATP-binding subunit ClpL
296716	G	0.1343	A	35.02	BLOCK_67#	SPN23F03110 295711 297816 putative ATP-dependent protease ATP-binding subunit ClpL
296718	A	0.06302	G	39.96	BLOCK_67#	SPN23F03110 295711 297816 putative ATP-dependent protease ATP-binding subunit ClpL
296748	G	0.1343	A	35.02	BLOCK_68#	SPN23F03110 295711 297816 putative ATP-dependent protease ATP-binding subunit ClpL
296820	T	0.09784	C	93.66	BLOCK_68#	SPN23F03110 295711 297816 putative ATP-dependent protease ATP-binding subunit ClpL
296868	C	0.1078	T	0.0433	BLOCK_68#	SPN23F03110 295711 297816 putative ATP-dependent protease ATP-binding subunit ClpL
296871	A	0.1211	G	24.06	BLOCK_68#	SPN23F03110 295711 297816 putative ATP-dependent protease ATP-binding subunit ClpL
296889	T	0.1144	C	19.4	BLOCK_68#	SPN23F03110 295711 297816 putative ATP-dependent protease ATP-binding subunit ClpL
296916	C	0.1227	T	249	BLOCK_68#	SPN23F03110 295711 297816 putative ATP-dependent protease ATP-binding subunit ClpL
297036	C	0.01161	T	NA	DISCRETE	SPN23F03110 295711 297816 putative ATP-dependent protease ATP-binding subunit ClpL
297048	T	0.1227	C	249	BLOCK_68#	SPN23F03110 295711 297816 putative ATP-dependent protease ATP-binding subunit ClpL
297067	C	0.126	T	30.49	BLOCK_68#	SPN23F03110 295711 297816 putative ATP-dependent protease ATP-binding subunit ClpL
297091	T	0.01161	C	NA	DISCRETE	SPN23F03110 295711 297816 putative ATP-dependent protease ATP-binding subunit ClpL
297093	G	0.01161	T	NA	DISCRETE	SPN23F03110 295711 297816 putative ATP-dependent protease ATP-binding subunit ClpL
297099	A	0.01161	G	NA	DISCRETE	SPN23F03110 295711 297816 putative ATP-dependent protease ATP-binding subunit ClpL
297120	C	0.01824	T	NA	DISCRETE	SPN23F03110 295711 297816 putative ATP-dependent protease ATP-binding subunit ClpL
297127	A	0.1211	C	21.37	BLOCK_68#	SPN23F03110 295711 297816 putative ATP-dependent protease ATP-binding subunit ClpL
297187	T	0.01658	C	NA	DISCRETE	SPN23F03110 295711 297816 putative ATP-dependent protease ATP-binding subunit ClpL
297499	C	0.2537	T	0.2039	BLOCK_68#	SPN23F03110 295711 297816 putative ATP-dependent protease ATP-binding subunit ClpL
297552	T	0.2968	C	11.11	BLOCK_69#	SPN23F03110 295711 297816 putative ATP-dependent protease ATP-binding subunit ClpL
297570	C	0.02488	T	NA	DISCRETE	SPN23F03110 295711 297816 putative ATP-dependent protease ATP-binding subunit ClpL
297653	T	0.1028	C	26.09	BLOCK_69#	SPN23F03110 295711 297816 putative ATP-dependent protease ATP-binding subunit ClpL
297712	C	0.03317	G	NA	DISCRETE	SPN23F03110 295711 297816 putative ATP-dependent protease ATP-binding subunit ClpL
297717	C	0.03317	T	NA	DISCRETE	SPN23F03110 295711 297816 putative ATP-dependent protease ATP-binding subunit ClpL
297723	C	0.03317	T	NA	DISCRETE	SPN23F03110 295711 297816 putative ATP-dependent protease ATP-binding subunit ClpL
297726	A	0.03317	G	NA	DISCRETE	SPN23F03110 295711 297816 putative ATP-dependent protease ATP-binding subunit ClpL
297750	C	0.1078	T	NA	DISCRETE	SPN23F03110 295711 297816 putative ATP-dependent protease ATP-binding subunit ClpL
297765	C	0.01493	T	NA	DISCRETE	SPN23F03110 295711 297816 putative ATP-dependent protease ATP-binding subunit ClpL
297768	A	0.01658	G	NA	DISCRETE	SPN23F03110 295711 297816 putative ATP-dependent protease ATP-binding subunit ClpL
297878	T	0.1824	C	16.8	DISCRETE	intergenic
299570	A	0.1327	G	26.82	BLOCK_70#	SPN23F03140 299246 300730 conserved hypothetical protein
299623	T	0.1741	C	21.65	BLOCK_70#	SPN23F03140 299246 300730 conserved hypothetical protein
299629	T	0.07629	C	0.04725	BLOCK_70#	SPN23F03140 299246 300730 conserved hypothetical protein
299848	A	0.07629	C	0.1418	BLOCK_70#	SPN23F03140 299246 300730 conserved hypothetical protein
300369	A	0.2405	G	0.1605	BLOCK_70#	SPN23F03140 299246 300730 conserved hypothetical protein
300470	C	0.1526	T	3.764	DISCRETE	SPN23F03140 299246 300730 conserved hypothetical protein
300623	G	0.3383	A	3.405	BLOCK_71#	SPN23F03140 299246 300730 conserved hypothetical protein
300637	G	0.335	A	3.31	BLOCK_71#	SPN23F03140 299246 300730 conserved hypothetical protein
300641	A	0.335	G	3.31	BLOCK_71#	SPN23F03140 299246 300730 conserved hypothetical protein
300795	T	0.1211	G	25.53	BLOCK_71#	intergenic
300903	C	0.1891	T	4.106	DISCRETE	SPN23F03150 300883 302490 glucan 1,6-alpha-glucosidase
300994	A	0.07297	G	0.04725	BLOCK_72#	SPN23F03150 300883 302490 glucan 1,6-alpha-glucosidase
301005	T	0.3814	C	0.1685	BLOCK_72#	SPN23F03150 300883 302490 glucan 1,6-alpha-glucosidase
301023	G	0.4494	A	0.1446	BLOCK_72#	SPN23F03150 300883 302490 glucan 1,6-alpha-glucosidase
301071	T	0.3284	C	3.905	DISCRETE	SPN23F03150 300883 302490 glucan 1,6-alpha-glucosidase
301131	G	0.4677	A	5.94	BLOCK_73#	SPN23F03150 300883 302490 glucan 1,6-alpha-glucosidase
301140	G	0.2604	A	0.2555	BLOCK_73#	SPN23F03150 300883 302490 glucan 1,6-alpha-glucosidase
301185	T	0.393	C	7.007	BLOCK_74#	SPN23F03150 300883 302490 glucan 1,6-alpha-glucosidase
301197	A	0.398	G	7.648	BLOCK_74#	SPN23F03150 300883 302490 glucan 1,6-alpha-glucosidase
301203	A	0.3997	G	7.603	BLOCK_74#	SPN23F03150 300883 302490 glucan 1,6-alpha-glucosidase
301239	C	0.335	T	8.717	BLOCK_75#	SPN23F03150 300883 302490 glucan 1,6-alpha-glucosidase
301288	A	0.04478	G	41.32	DISCRETE	SPN23F03150 300883 302490 glucan 1,6-alpha-glucosidase
301362	A	0.08458	G	21.34	BLOCK_75#	SPN23F03150 300883 302490 glucan 1,6-alpha-glucosidase
301610	C	0.09121	A	41.37	BLOCK_76#	SPN23F03150 300883 302490 glucan 1,6-alpha-glucosidase
301623	T	0.1227	C	27	BLOCK_76#	SPN23F03150 300883 302490 glucan 1,6-alpha-glucosidase
301725	A	0.1028	G	0.1196	DISCRETE	SPN23F03150 300883 302490 glucan 1,6-alpha-glucosidase
301791	T	0.1808	C	4.5	BLOCK_77#	SPN23F03150 300883 302490 glucan 1,6-alpha-glucosidase
301815	T	0.2106	C	3.941	BLOCK_77#	SPN23F03150 300883 302490 glucan 1,6-alpha-glucosidase
301833	C	0.1957	T	4.635	BLOCK_77#	SPN23F03150 300883 302490 glucan 1,6-alpha-glucosidase
301974	A	0.1774	G	0.0899	BLOCK_77#	SPN23F03150 300883 302490 glucan 1,6-alpha-glucosidase
302040	G	0.1161	T	0.09893	BLOCK_78#	SPN23F03150 300883 302490 glucan 1,6-alpha-glucosidase
302041	C	0.1028	G	0.09893	BLOCK_78#	SPN23F03150 300883 302490 glucan 1,6-alpha-glucosidase
302135	A	0.1725	G	17.91	BLOCK_79#	SPN23F03150 300883 302490 glucan 1,6-alpha-glucosidase
302256	T	0.1542	C	7.175	BLOCK_79#	SPN23F03150 300883 302490 glucan 1,6-alpha-glucosidase
302421	T	0.4262	C	0.1947	BLOCK_79#	SPN23F03150 300883 302490 glucan 1,6-alpha-glucosidase
302422	G	0.4262	C	0.1881	BLOCK_79#	SPN23F03150 300883 302490 glucan 1,6-alpha-glucosidase
302423	C	0.4262	T	0.1881	BLOCK_79#	SPN23F03150 300883 302490 glucan 1,6-alpha-glucosidase
302424	G	0.4279	A	0.1851	BLOCK_79#	SPN23F03150 300883 302490 glucan 1,6-alpha-glucosidase
302428	A	0.4212	C	0.2076	BLOCK_79#	SPN23F03150 300883 302490 glucan 1,6-alpha-glucosidase
302436	A	0.4212	C	0.2096	BLOCK_79#	SPN23F03150 300883 302490 glucan 1,6-alpha-glucosidase
302437	C	0.4229	T	0.205	BLOCK_79#	SPN23F03150 300883 302490 glucan 1,6-alpha-glucosidase
303543	G	0.3284	T	6.036	BLOCK_80#	intergenic
303615	C	0.4163	A	5.636	BLOCK_80#	SPN23F03180 303559 305004 capsule biosynthesis integral membrane regulatory protein Wzg
303622	T	0.4942	C	0.2371	BLOCK_80#	SPN23F03180 303559 305004 capsule biosynthesis integral membrane regulatory protein Wzg
303647	A	0.1128	G	80.9	BLOCK_80#	SPN23F03180 303559 305004 capsule biosynthesis integral membrane regulatory protein Wzg
303702	C	0.33	T	7.373	DISCRETE	SPN23F03180 303559 305004 capsule biosynthesis integral membrane regulatory protein Wzg
303777	G	0.3599	A	9.932	BLOCK_81#	SPN23F03180 303559 305004 capsule biosynthesis integral membrane regulatory protein Wzg
303849	G	0.1194	T	83.33	BLOCK_81#	SPN23F03180 303559 305004 capsule biosynthesis integral membrane regulatory protein Wzg
303906	T	0.1161	C	81.16	BLOCK_81#	SPN23F03180 303559 305004 capsule biosynthesis integral membrane regulatory protein Wzg
303930	T	0.136	C	42.09	BLOCK_81#	SPN23F03180 303559 305004 capsule biosynthesis integral membrane regulatory protein Wzg
303933	G	0.136	A	42.09	BLOCK_81#	SPN23F03180 303559 305004 capsule biosynthesis integral membrane regulatory protein Wzg
303950	T	0.1161	C	81.16	BLOCK_81#	SPN23F03180 303559 305004 capsule biosynthesis integral membrane regulatory protein Wzg
303987	C	0.1642	T	39.01	DISCRETE	SPN23F03180 303559 305004 capsule biosynthesis integral membrane regulatory protein Wzg
304014	A	0.1625	G	10.67	BLOCK_82#	SPN23F03180 303559 305004 capsule biosynthesis integral membrane regulatory protein Wzg
304044	T	0.194	C	10.68	BLOCK_82#	SPN23F03180 303559 305004 capsule biosynthesis integral membrane regulatory protein Wzg
304065	T	0.1327	A	0.1712	BLOCK_82#	SPN23F03180 303559 305004 capsule biosynthesis integral membrane regulatory protein Wzg
304071	T	0.1841	C	13.81	DISCRETE	SPN23F03180 303559 305004 capsule biosynthesis integral membrane regulatory protein Wzg
304108	T	0.4411	C	3.933	BLOCK_83#	SPN23F03180 303559 305004 capsule biosynthesis integral membrane regulatory protein Wzg
304137	A	0.1625	G	10.67	BLOCK_83#	SPN23F03180 303559 305004 capsule biosynthesis integral membrane regulatory protein Wzg
304140	G	0.1625	A	10.67	BLOCK_83#	SPN23F03180 303559 305004 capsule biosynthesis integral membrane regulatory protein Wzg
304144	C	0.1161	T	81.16	BLOCK_83#	SPN23F03180 303559 305004 capsule biosynthesis integral membrane regulatory protein Wzg
304152	T	0.1625	C	10.67	BLOCK_83#	SPN23F03180 303559 305004 capsule biosynthesis integral membrane regulatory protein Wzg
304225	G	0.1161	A	81.16	BLOCK_83#	SPN23F03180 303559 305004 capsule biosynthesis integral membrane regulatory protein Wzg
304260	T	0.1625	C	10.67	BLOCK_83#	SPN23F03180 303559 305004 capsule biosynthesis integral membrane regulatory protein Wzg
304263	T	0.1625	C	10.67	BLOCK_83#	SPN23F03180 303559 305004 capsule biosynthesis integral membrane regulatory protein Wzg
304290	T	0.1625	A	10.67	BLOCK_83#	SPN23F03180 303559 305004 capsule biosynthesis integral membrane regulatory protein Wzg
304338	T	0.1708	C	8.697	BLOCK_83#	SPN23F03180 303559 305004 capsule biosynthesis integral membrane regulatory protein Wzg
304347	A	0.1493	C	0.1712	BLOCK_83#	SPN23F03180 303559 305004 capsule biosynthesis integral membrane regulatory protein Wzg
304359	A	0.1343	T	0.1579	BLOCK_83#	SPN23F03180 303559 305004 capsule biosynthesis integral membrane regulatory protein Wzg
304363	T	0.1493	G	0.1712	BLOCK_83#	SPN23F03180 303559 305004 capsule biosynthesis integral membrane regulatory protein Wzg
304374	T	0.1343	A	0.1579	BLOCK_83#	SPN23F03180 303559 305004 capsule biosynthesis integral membrane regulatory protein Wzg
304389	G	0.1493	A	10.72	BLOCK_83#	SPN23F03180 303559 305004 capsule biosynthesis integral membrane regulatory protein Wzg
304446	C	0.1177	T	88.33	BLOCK_83#	SPN23F03180 303559 305004 capsule biosynthesis integral membrane regulatory protein Wzg
304452	T	0.1177	C	88.33	BLOCK_83#	SPN23F03180 303559 305004 capsule biosynthesis integral membrane regulatory protein Wzg
304512	T	0.403	C	0.1493	DISCRETE	SPN23F03180 303559 305004 capsule biosynthesis integral membrane regulatory protein Wzg
304524	C	0.1493	T	10.72	BLOCK_84#	SPN23F03180 303559 305004 capsule biosynthesis integral membrane regulatory protein Wzg
304539	A	0.2919	G	0.1144	BLOCK_84#	SPN23F03180 303559 305004 capsule biosynthesis integral membrane regulatory protein Wzg
304540	A	0.3648	G	0.1163	BLOCK_84#	SPN23F03180 303559 305004 capsule biosynthesis integral membrane regulatory protein Wzg
304542	T	0.2736	A	0.1144	BLOCK_84#	SPN23F03180 303559 305004 capsule biosynthesis integral membrane regulatory protein Wzg
304557	C	0.2007	T	7.799	BLOCK_84#	SPN23F03180 303559 305004 capsule biosynthesis integral membrane regulatory protein Wzg
304567	A	0.2902	T	3.205	DISCRETE	SPN23F03180 303559 305004 capsule biosynthesis integral membrane regulatory protein Wzg
304578	C	0.1559	T	8.88	BLOCK_85#	SPN23F03180 303559 305004 capsule biosynthesis integral membrane regulatory protein Wzg
304599	T	0.1559	A	8.88	BLOCK_85#	SPN23F03180 303559 305004 capsule biosynthesis integral membrane regulatory protein Wzg
304611	C	0.1642	T	7.666	BLOCK_85#	SPN23F03180 303559 305004 capsule biosynthesis integral membrane regulatory protein Wzg
304612	T	0.1559	C	8.88	BLOCK_85#	SPN23F03180 303559 305004 capsule biosynthesis integral membrane regulatory protein Wzg
304635	A	0.1559	T	8.88	BLOCK_85#	SPN23F03180 303559 305004 capsule biosynthesis integral membrane regulatory protein Wzg
304653	T	0.1692	C	8.995	BLOCK_85#	SPN23F03180 303559 305004 capsule biosynthesis integral membrane regulatory protein Wzg
304673	A	0.1526	G	7.916	BLOCK_85#	SPN23F03180 303559 305004 capsule biosynthesis integral membrane regulatory protein Wzg
304689	T	0.3997	C	3.56	BLOCK_85#	SPN23F03180 303559 305004 capsule biosynthesis integral membrane regulatory protein Wzg
304706	C	0.1708	T	6.555	BLOCK_85#	SPN23F03180 303559 305004 capsule biosynthesis integral membrane regulatory protein Wzg
304794	C	0.1708	T	9.343	BLOCK_85#	SPN23F03180 303559 305004 capsule biosynthesis integral membrane regulatory protein Wzg
304809	C	0.3317	T	5.876	BLOCK_85#	SPN23F03180 303559 305004 capsule biosynthesis integral membrane regulatory protein Wzg
304818	C	0.1708	T	9.343	BLOCK_85#	SPN23F03180 303559 305004 capsule biosynthesis integral membrane regulatory protein Wzg
304848	A	0.1907	G	6.517	BLOCK_85#	SPN23F03180 303559 305004 capsule biosynthesis integral membrane regulatory protein Wzg
304849	G	0.06468	A	0	BLOCK_85#	SPN23F03180 303559 305004 capsule biosynthesis integral membrane regulatory protein Wzg
304850	C	0.1907	A	6.517	BLOCK_85#	SPN23F03180 303559 305004 capsule biosynthesis integral membrane regulatory protein Wzg
304851	G	0.2007	T	6.519	BLOCK_85#	SPN23F03180 303559 305004 capsule biosynthesis integral membrane regulatory protein Wzg
304854	C	0.1907	T	6.517	BLOCK_85#	SPN23F03180 303559 305004 capsule biosynthesis integral membrane regulatory protein Wzg
304860	G	0.1376	A	13.02	BLOCK_86#	SPN23F03180 303559 305004 capsule biosynthesis integral membrane regulatory protein Wzg
304866	G	0.2637	T	7.736	BLOCK_86#	SPN23F03180 303559 305004 capsule biosynthesis integral membrane regulatory protein Wzg
304872	C	0.2637	T	7.736	BLOCK_86#	SPN23F03180 303559 305004 capsule biosynthesis integral membrane regulatory protein Wzg
304875	G	0.2637	A	7.736	BLOCK_86#	SPN23F03180 303559 305004 capsule biosynthesis integral membrane regulatory protein Wzg
304878	G	0.1708	A	9.343	BLOCK_87#	SPN23F03180 303559 305004 capsule biosynthesis integral membrane regulatory protein Wzg
304884	G	0.1708	A	9.343	BLOCK_87#	SPN23F03180 303559 305004 capsule biosynthesis integral membrane regulatory protein Wzg
304905	C	0.2504	T	9.101	BLOCK_87#	SPN23F03180 303559 305004 capsule biosynthesis integral membrane regulatory protein Wzg
304911	G	0.2504	A	9.101	BLOCK_87#	SPN23F03180 303559 305004 capsule biosynthesis integral membrane regulatory protein Wzg
304920	T	0.2587	C	8.334	BLOCK_87#	SPN23F03180 303559 305004 capsule biosynthesis integral membrane regulatory protein Wzg
304933	A	0.1575	G	8.283	BLOCK_87#	SPN23F03180 303559 305004 capsule biosynthesis integral membrane regulatory protein Wzg
304980	T	0.2289	A	7.63	DISCRETE	SPN23F03180 303559 305004 capsule biosynthesis integral membrane regulatory protein Wzg
304987	A	0.1294	G	27.2	DISCRETE	SPN23F03180 303559 305004 capsule biosynthesis integral membrane regulatory protein Wzg
304990	T	0.2322	A	7.657	BLOCK_88#	SPN23F03180 303559 305004 capsule biosynthesis integral membrane regulatory protein Wzg
304998	C	0.2438	T	10.76	BLOCK_88#	SPN23F03180 303559 305004 capsule biosynthesis integral membrane regulatory protein Wzg
305011	T	0.2504	A	9.101	BLOCK_88#	SPN23F03190 305006 305737 capsule biosynthesis protein-tyrosine phosphatase Wzh
305014	T	0.3085	C	5.758	BLOCK_88#	SPN23F03190 305006 305737 capsule biosynthesis protein-tyrosine phosphatase Wzh
305017	T	0.2504	C	9.101	BLOCK_88#	SPN23F03190 305006 305737 capsule biosynthesis protein-tyrosine phosphatase Wzh
305026	C	0.2968	T	5.057	BLOCK_88#	SPN23F03190 305006 305737 capsule biosynthesis protein-tyrosine phosphatase Wzh
305032	C	0.2935	T	5.287	BLOCK_88#	SPN23F03190 305006 305737 capsule biosynthesis protein-tyrosine phosphatase Wzh
305047	T	0.2952	C	5.17	BLOCK_88#	SPN23F03190 305006 305737 capsule biosynthesis protein-tyrosine phosphatase Wzh
305267	T	0.2056	C	5.574	BLOCK_88#	SPN23F03190 305006 305737 capsule biosynthesis protein-tyrosine phosphatase Wzh
305306	A	0.2504	G	9.101	BLOCK_88#	SPN23F03190 305006 305737 capsule biosynthesis protein-tyrosine phosphatase Wzh
305344	C	0.2355	T	8.537	BLOCK_88#	SPN23F03190 305006 305737 capsule biosynthesis protein-tyrosine phosphatase Wzh
305374	T	0.2504	C	9.101	BLOCK_88#	SPN23F03190 305006 305737 capsule biosynthesis protein-tyrosine phosphatase Wzh
305431	A	0.1973	T	59.4	BLOCK_88#	SPN23F03190 305006 305737 capsule biosynthesis protein-tyrosine phosphatase Wzh
305461	G	0.2504	A	9.101	BLOCK_88#	SPN23F03190 305006 305737 capsule biosynthesis protein-tyrosine phosphatase Wzh
305468	A	0.1559	G	8.88	BLOCK_89#	SPN23F03190 305006 305737 capsule biosynthesis protein-tyrosine phosphatase Wzh
305572	A	0.3466	G	0.2554	BLOCK_89#	SPN23F03190 305006 305737 capsule biosynthesis protein-tyrosine phosphatase Wzh
305578	C	0.1177	T	88.33	BLOCK_89#	SPN23F03190 305006 305737 capsule biosynthesis protein-tyrosine phosphatase Wzh
305581	A	0.3466	G	0.2554	BLOCK_89#	SPN23F03190 305006 305737 capsule biosynthesis protein-tyrosine phosphatase Wzh
305588	A	0.2338	G	13.37	BLOCK_90#	SPN23F03190 305006 305737 capsule biosynthesis protein-tyrosine phosphatase Wzh
305591	G	0.3383	A	0.253	BLOCK_90#	SPN23F03190 305006 305737 capsule biosynthesis protein-tyrosine phosphatase Wzh
305602	C	0.3018	T	0.1296	BLOCK_91#	SPN23F03190 305006 305737 capsule biosynthesis protein-tyrosine phosphatase Wzh
305608	T	0.2504	C	9.101	BLOCK_91#	SPN23F03190 305006 305737 capsule biosynthesis protein-tyrosine phosphatase Wzh
305614	G	0.2504	A	9.101	BLOCK_91#	SPN23F03190 305006 305737 capsule biosynthesis protein-tyrosine phosphatase Wzh
305620	C	0.3002	T	8.475	BLOCK_91#	SPN23F03190 305006 305737 capsule biosynthesis protein-tyrosine phosphatase Wzh
305690	T	0.1907	C	0.1479	BLOCK_91#	SPN23F03190 305006 305737 capsule biosynthesis protein-tyrosine phosphatase Wzh
305696	G	0.4179	A	0.2481	BLOCK_92#	SPN23F03190 305006 305737 capsule biosynthesis protein-tyrosine phosphatase Wzh
305707	C	0.3914	T	0.2433	BLOCK_92#	SPN23F03190 305006 305737 capsule biosynthesis protein-tyrosine phosphatase Wzh
305708	A	0.3914	C	0.2433	BLOCK_92#	SPN23F03190 305006 305737 capsule biosynthesis protein-tyrosine phosphatase Wzh
305717	A	0.3914	G	0.2433	BLOCK_92#	SPN23F03190 305006 305737 capsule biosynthesis protein-tyrosine phosphatase Wzh
305729	T	0.3914	C	0.2433	BLOCK_92#	SPN23F03190 305006 305737 capsule biosynthesis protein-tyrosine phosphatase Wzh
305744	A	0.3914	T	0.2433	BLOCK_92#	intergenic
305751	G	0.4013	A	0.2414	BLOCK_92#	SPN23F03200 305746 306438 capsule biosynthesis chain length determinant protein Wzd
305757	C	0.1692	A	0.1369	BLOCK_92#	SPN23F03200 305746 306438 capsule biosynthesis chain length determinant protein Wzd
305763	T	0.4179	G	0.2481	BLOCK_92#	SPN23F03200 305746 306438 capsule biosynthesis chain length determinant protein Wzd
305764	T	0.3914	A	0.2433	BLOCK_92#	SPN23F03200 305746 306438 capsule biosynthesis chain length determinant protein Wzd
305766	G	0.4179	A	0.2481	BLOCK_92#	SPN23F03200 305746 306438 capsule biosynthesis chain length determinant protein Wzd
305776	A	0.2106	G	0.1604	BLOCK_92#	SPN23F03200 305746 306438 capsule biosynthesis chain length determinant protein Wzd
305781	G	0.3897	T	0.2461	BLOCK_92#	SPN23F03200 305746 306438 capsule biosynthesis chain length determinant protein Wzd
305928	G	0.3897	A	0.2438	BLOCK_92#	SPN23F03200 305746 306438 capsule biosynthesis chain length determinant protein Wzd
305930	A	0.3615	G	0.207	DISCRETE	SPN23F03200 305746 306438 capsule biosynthesis chain length determinant protein Wzd
305938	T	0.4362	C	0.2882	DISCRETE	SPN23F03200 305746 306438 capsule biosynthesis chain length determinant protein Wzd
305946	A	0.3881	G	0.2444	BLOCK_93#	SPN23F03200 305746 306438 capsule biosynthesis chain length determinant protein Wzd
305955	A	0.3881	G	0.2444	BLOCK_93#	SPN23F03200 305746 306438 capsule biosynthesis chain length determinant protein Wzd
305994	C	0.2504	T	9.101	BLOCK_93#	SPN23F03200 305746 306438 capsule biosynthesis chain length determinant protein Wzd
306675	C	0.2769	T	7.363	BLOCK_93#	SPN23F03210 306448 307137 capsule biosynthesis tyrosine-protein kinase Wze
306690	A	0.3582	T	0.2444	BLOCK_93#	SPN23F03210 306448 307137 capsule biosynthesis tyrosine-protein kinase Wze
306691	T	0.325	G	0.3012	BLOCK_93#	SPN23F03210 306448 307137 capsule biosynthesis tyrosine-protein kinase Wze
306693	T	0.3781	C	0.2516	BLOCK_93#	SPN23F03210 306448 307137 capsule biosynthesis tyrosine-protein kinase Wze
306703	C	0.3715	A	0.2557	BLOCK_93#	SPN23F03210 306448 307137 capsule biosynthesis tyrosine-protein kinase Wze
306706	A	0.4959	G	0.3176	BLOCK_93#	SPN23F03210 306448 307137 capsule biosynthesis tyrosine-protein kinase Wze
306710	G	0.2504	A	9.101	BLOCK_93#	SPN23F03210 306448 307137 capsule biosynthesis tyrosine-protein kinase Wze
306733	C	0.2504	T	9.101	BLOCK_93#	SPN23F03210 306448 307137 capsule biosynthesis tyrosine-protein kinase Wze
306738	T	0.3516	A	0.2467	BLOCK_93#	SPN23F03210 306448 307137 capsule biosynthesis tyrosine-protein kinase Wze
306745	G	0.3499	A	0.2496	BLOCK_93#	SPN23F03210 306448 307137 capsule biosynthesis tyrosine-protein kinase Wze
306747	T	0.3516	A	0.2467	BLOCK_93#	SPN23F03210 306448 307137 capsule biosynthesis tyrosine-protein kinase Wze
306750	T	0.3516	C	0.2467	BLOCK_93#	SPN23F03210 306448 307137 capsule biosynthesis tyrosine-protein kinase Wze
306751	T	0.4726	C	0.2286	BLOCK_93#	SPN23F03210 306448 307137 capsule biosynthesis tyrosine-protein kinase Wze
306753	G	0.2687	A	7.045	BLOCK_93#	SPN23F03210 306448 307137 capsule biosynthesis tyrosine-protein kinase Wze
306756	T	0.3516	A	0.2467	BLOCK_93#	SPN23F03210 306448 307137 capsule biosynthesis tyrosine-protein kinase Wze
306763	T	0.3516	C	0.2467	BLOCK_93#	SPN23F03210 306448 307137 capsule biosynthesis tyrosine-protein kinase Wze
306765	A	0.3781	T	0.2516	BLOCK_93#	SPN23F03210 306448 307137 capsule biosynthesis tyrosine-protein kinase Wze
306768	C	0.2355	T	8.537	BLOCK_93#	SPN23F03210 306448 307137 capsule biosynthesis tyrosine-protein kinase Wze
306774	A	0.3516	C	0.2467	BLOCK_93#	SPN23F03210 306448 307137 capsule biosynthesis tyrosine-protein kinase Wze
306783	G	0.2504	A	9.101	BLOCK_93#	SPN23F03210 306448 307137 capsule biosynthesis tyrosine-protein kinase Wze
306787	T	0.3516	C	0.2467	BLOCK_93#	SPN23F03210 306448 307137 capsule biosynthesis tyrosine-protein kinase Wze
306789	A	0.3516	C	0.2467	BLOCK_94#	SPN23F03210 306448 307137 capsule biosynthesis tyrosine-protein kinase Wze
308009	A	0.335	T	0.2431	BLOCK_94#	SPN23F03220 307152 308519 undecaprenylphosphate glucosephosphotransferase WchA (initial sugar transferase)
308018	T	0.335	A	0.2431	BLOCK_94#	SPN23F03220 307152 308519 undecaprenylphosphate glucosephosphotransferase WchA (initial sugar transferase)
308021	A	0.335	G	0.2431	BLOCK_94#	SPN23F03220 307152 308519 undecaprenylphosphate glucosephosphotransferase WchA (initial sugar transferase)
308027	C	0.335	G	0.2431	BLOCK_94#	SPN23F03220 307152 308519 undecaprenylphosphate glucosephosphotransferase WchA (initial sugar transferase)
308031	C	0.3284	T	0.2532	BLOCK_94#	SPN23F03220 307152 308519 undecaprenylphosphate glucosephosphotransferase WchA (initial sugar transferase)
308033	A	0.3333	T	0.2458	BLOCK_94#	SPN23F03220 307152 308519 undecaprenylphosphate glucosephosphotransferase WchA (initial sugar transferase)
308037	T	0.199	A	59.5	BLOCK_94#	SPN23F03220 307152 308519 undecaprenylphosphate glucosephosphotransferase WchA (initial sugar transferase)
308048	A	0.335	G	0.2431	BLOCK_94#	SPN23F03220 307152 308519 undecaprenylphosphate glucosephosphotransferase WchA (initial sugar transferase)
308051	T	0.335	G	0.2431	BLOCK_94#	SPN23F03220 307152 308519 undecaprenylphosphate glucosephosphotransferase WchA (initial sugar transferase)
308060	G	0.3499	A	0.3052	BLOCK_94#	SPN23F03220 307152 308519 undecaprenylphosphate glucosephosphotransferase WchA (initial sugar transferase)
308069	C	0.2371	T	8.551	BLOCK_94#	SPN23F03220 307152 308519 undecaprenylphosphate glucosephosphotransferase WchA (initial sugar transferase)
308207	C	0.335	T	0.2431	BLOCK_94#	SPN23F03220 307152 308519 undecaprenylphosphate glucosephosphotransferase WchA (initial sugar transferase)
308213	T	0.335	A	0.2431	BLOCK_94#	SPN23F03220 307152 308519 undecaprenylphosphate glucosephosphotransferase WchA (initial sugar transferase)
308216	T	0.335	G	0.2431	BLOCK_94#	SPN23F03220 307152 308519 undecaprenylphosphate glucosephosphotransferase WchA (initial sugar transferase)
308225	T	0.335	C	0.2431	BLOCK_94#	SPN23F03220 307152 308519 undecaprenylphosphate glucosephosphotransferase WchA (initial sugar transferase)
308231	T	0.335	C	0.2431	BLOCK_94#	SPN23F03220 307152 308519 undecaprenylphosphate glucosephosphotransferase WchA (initial sugar transferase)
308234	A	0.2836	G	0.2783	BLOCK_94#	SPN23F03220 307152 308519 undecaprenylphosphate glucosephosphotransferase WchA (initial sugar transferase)
308235	T	0.3582	C	0.2395	BLOCK_94#	SPN23F03220 307152 308519 undecaprenylphosphate glucosephosphotransferase WchA (initial sugar transferase)
308237	G	0.2852	A	0.2756	BLOCK_94#	SPN23F03220 307152 308519 undecaprenylphosphate glucosephosphotransferase WchA (initial sugar transferase)
308248	G	0.3367	A	0.2421	BLOCK_94#	SPN23F03220 307152 308519 undecaprenylphosphate glucosephosphotransferase WchA (initial sugar transferase)
308256	T	0.3383	C	0.2397	BLOCK_94#	SPN23F03220 307152 308519 undecaprenylphosphate glucosephosphotransferase WchA (initial sugar transferase)
308259	T	0.3333	A	0.2471	BLOCK_94#	SPN23F03220 307152 308519 undecaprenylphosphate glucosephosphotransferase WchA (initial sugar transferase)
308300	A	0.3367	G	0.2421	BLOCK_94#	SPN23F03220 307152 308519 undecaprenylphosphate glucosephosphotransferase WchA (initial sugar transferase)
308315	G	0.3831	C	0.2413	BLOCK_94#	SPN23F03220 307152 308519 undecaprenylphosphate glucosephosphotransferase WchA (initial sugar transferase)
308330	G	0.3234	A	0.1249	BLOCK_94#	SPN23F03220 307152 308519 undecaprenylphosphate glucosephosphotransferase WchA (initial sugar transferase)
308345	C	0.3781	T	0.2496	BLOCK_94#	SPN23F03220 307152 308519 undecaprenylphosphate glucosephosphotransferase WchA (initial sugar transferase)
308360	T	0.3831	A	0.2413	BLOCK_94#	SPN23F03220 307152 308519 undecaprenylphosphate glucosephosphotransferase WchA (initial sugar transferase)
308378	T	0.3847	C	0.2403	BLOCK_94#	SPN23F03220 307152 308519 undecaprenylphosphate glucosephosphotransferase WchA (initial sugar transferase)
308387	T	0.3682	A	0.2502	BLOCK_94#	SPN23F03220 307152 308519 undecaprenylphosphate glucosephosphotransferase WchA (initial sugar transferase)
308391	A	0.3847	G	0.2403	BLOCK_94#	SPN23F03220 307152 308519 undecaprenylphosphate glucosephosphotransferase WchA (initial sugar transferase)
308398	C	0.3781	A	0.2496	BLOCK_94#	SPN23F03220 307152 308519 undecaprenylphosphate glucosephosphotransferase WchA (initial sugar transferase)
308400	G	0.3798	A	0.2486	BLOCK_94#	SPN23F03220 307152 308519 undecaprenylphosphate glucosephosphotransferase WchA (initial sugar transferase)
308405	C	0.4544	T	4.39	BLOCK_94#	SPN23F03220 307152 308519 undecaprenylphosphate glucosephosphotransferase WchA (initial sugar transferase)
308408	C	0.3798	T	0.2486	BLOCK_94#	SPN23F03220 307152 308519 undecaprenylphosphate glucosephosphotransferase WchA (initial sugar transferase)
308417	A	0.3847	C	0.2403	BLOCK_94#	SPN23F03220 307152 308519 undecaprenylphosphate glucosephosphotransferase WchA (initial sugar transferase)
308432	T	0.4527	C	0.1864	BLOCK_94#	SPN23F03220 307152 308519 undecaprenylphosphate glucosephosphotransferase WchA (initial sugar transferase)
308442	A	0.3881	G	0.2521	BLOCK_94#	SPN23F03220 307152 308519 undecaprenylphosphate glucosephosphotransferase WchA (initial sugar transferase)
308443	G	0.3184	A	5.497	DISCRETE	SPN23F03220 307152 308519 undecaprenylphosphate glucosephosphotransferase WchA (initial sugar transferase)
323798	C	0.194	T	6.777	BLOCK_95#	SPN23F03390 323780 325762 putative extracellular oligopeptide-binding protein
323866	T	0.1476	C	0.1127	BLOCK_95#	SPN23F03390 323780 325762 putative extracellular oligopeptide-binding protein
323867	G	0.2952	A	5.498	DISCRETE	SPN23F03390 323780 325762 putative extracellular oligopeptide-binding protein
324382	A	0.3184	G	6.64	DISCRETE	SPN23F03390 323780 325762 putative extracellular oligopeptide-binding protein
324814	A	0.2736	T	5.188	BLOCK_96#	SPN23F03390 323780 325762 putative extracellular oligopeptide-binding protein
324820	C	0.2736	T	5.188	BLOCK_96#	SPN23F03390 323780 325762 putative extracellular oligopeptide-binding protein
324865	T	0.3068	C	6.036	BLOCK_97#	SPN23F03390 323780 325762 putative extracellular oligopeptide-binding protein
324874	G	0.2919	A	6.016	BLOCK_97#	SPN23F03390 323780 325762 putative extracellular oligopeptide-binding protein
324881	C	0.3632	A	4.947	BLOCK_97#	SPN23F03390 323780 325762 putative extracellular oligopeptide-binding protein
325195	C	0.398	T	0.2263	DISCRETE	SPN23F03390 323780 325762 putative extracellular oligopeptide-binding protein
325327	T	0.1725	C	15.47	BLOCK_98#	SPN23F03390 323780 325762 putative extracellular oligopeptide-binding protein
325336	T	0.1725	A	15.47	BLOCK_98#	SPN23F03390 323780 325762 putative extracellular oligopeptide-binding protein
325558	T	0.1194	C	0.03924	BLOCK_98#	SPN23F03390 323780 325762 putative extracellular oligopeptide-binding protein
325848	T	0.09121	C	58.97	BLOCK_99#	intergenic
326510	T	0.136	C	6.209	BLOCK_99#	SPN23F03400 326063 331366 cell wall surface anchored protein
326677	G	0.3134	T	0.1979	BLOCK_100#	SPN23F03400 326063 331366 cell wall surface anchored protein
326680	C	0.1774	T	0.1771	BLOCK_100#	SPN23F03400 326063 331366 cell wall surface anchored protein
326738	G	0.1078	A	15.68	BLOCK_101#	SPN23F03400 326063 331366 cell wall surface anchored protein
327123	C	0.403	G	0.1689	BLOCK_101#	SPN23F03400 326063 331366 cell wall surface anchored protein
327154	T	0.09121	G	58.97	DISCRETE	SPN23F03400 326063 331366 cell wall surface anchored protein
327523	T	0.1294	C	0.1435	DISCRETE	SPN23F03400 326063 331366 cell wall surface anchored protein
327535	A	0.3333	G	5.811	BLOCK_102#	SPN23F03400 326063 331366 cell wall surface anchored protein
327538	C	0.3333	T	5.811	BLOCK_102#	SPN23F03400 326063 331366 cell wall surface anchored protein
327539	C	0.3317	T	5.443	BLOCK_102#	SPN23F03400 326063 331366 cell wall surface anchored protein
327541	A	0.3333	G	5.811	BLOCK_102#	SPN23F03400 326063 331366 cell wall surface anchored protein
327544	C	0.3234	T	6.99	BLOCK_102#	SPN23F03400 326063 331366 cell wall surface anchored protein
327613	T	0.2587	C	0.2113	DISCRETE	SPN23F03400 326063 331366 cell wall surface anchored protein
327655	C	0.08955	T	44.56	BLOCK_103#	SPN23F03400 326063 331366 cell wall surface anchored protein
327823	G	0.3599	A	5.427	BLOCK_103#	SPN23F03400 326063 331366 cell wall surface anchored protein
328558	A	0.1045	C	9.542	DISCRETE	SPN23F03400 326063 331366 cell wall surface anchored protein
328585	A	0.3748	T	4.251	BLOCK_104#	SPN23F03400 326063 331366 cell wall surface anchored protein
328678	T	0.0995	C	0.104	BLOCK_104#	SPN23F03400 326063 331366 cell wall surface anchored protein
329266	T	0.1111	C	0.04762	BLOCK_105#	SPN23F03400 326063 331366 cell wall surface anchored protein
329409	G	0.0796	A	0.05558	BLOCK_105#	SPN23F03400 326063 331366 cell wall surface anchored protein
329527	A	0.4776	T	5.219	BLOCK_106#	SPN23F03400 326063 331366 cell wall surface anchored protein
329530	A	0.4627	G	6.218	BLOCK_106#	SPN23F03400 326063 331366 cell wall surface anchored protein
329536	T	0.09784	C	10.01	BLOCK_107#	SPN23F03400 326063 331366 cell wall surface anchored protein
329570	A	0.2007	G	0.1645	BLOCK_107#	SPN23F03400 326063 331366 cell wall surface anchored protein
329666	G	0.1658	C	4.962	BLOCK_107#	SPN23F03400 326063 331366 cell wall surface anchored protein
329719	T	0.2272	C	0.1703	BLOCK_107#	SPN23F03400 326063 331366 cell wall surface anchored protein
330162	T	0.1924	C	0.0573	DISCRETE	SPN23F03400 326063 331366 cell wall surface anchored protein
330406	G	0.1244	T	8.12	DISCRETE	SPN23F03400 326063 331366 cell wall surface anchored protein
330430	T	0.09453	C	0.09207	BLOCK_108#	SPN23F03400 326063 331366 cell wall surface anchored protein
330691	A	0.09784	C	8.952	BLOCK_108#	SPN23F03400 326063 331366 cell wall surface anchored protein
331049	T	0.09619	G	9.625	BLOCK_108#	SPN23F03400 326063 331366 cell wall surface anchored protein
331215	T	0.1078	C	4.501	BLOCK_108#	SPN23F03400 326063 331366 cell wall surface anchored protein
331256	A	0.1078	G	4.501	BLOCK_108#	SPN23F03400 326063 331366 cell wall surface anchored protein
331500	A	0.2786	C	4.85	BLOCK_108#	intergenic
331890	A	0.1841	G	NA	BLOCK_109#	SPN23F03410 331533 333692 putative penicillin-binding protein 1A
331917	A	0.1874	T	NA	BLOCK_109#	SPN23F03410 331533 333692 putative penicillin-binding protein 1A
331919	C	0.04643	A	26.05	BLOCK_109#	SPN23F03410 331533 333692 putative penicillin-binding protein 1A
331923	C	0.1874	T	NA	BLOCK_109#	SPN23F03410 331533 333692 putative penicillin-binding protein 1A
331926	G	0.04478	A	24.33	DISCRETE	SPN23F03410 331533 333692 putative penicillin-binding protein 1A
331939	A	0.2355	G	80.12	BLOCK_109#	SPN23F03410 331533 333692 putative penicillin-binding protein 1A
331944	C	0.2355	T	80.12	BLOCK_109#	SPN23F03410 331533 333692 putative penicillin-binding protein 1A
331950	G	0.2471	A	0.06707	BLOCK_109#	SPN23F03410 331533 333692 putative penicillin-binding protein 1A
331953	T	0.2371	A	84.19	BLOCK_109#	SPN23F03410 331533 333692 putative penicillin-binding protein 1A
331956	A	0.2371	T	84.19	BLOCK_109#	SPN23F03410 331533 333692 putative penicillin-binding protein 1A
331962	G	0.1891	A	45.22	BLOCK_109#	SPN23F03410 331533 333692 putative penicillin-binding protein 1A
331963	T	0.2371	A	84.19	BLOCK_109#	SPN23F03410 331533 333692 putative penicillin-binding protein 1A
331966	C	0.2371	T	84.19	BLOCK_109#	SPN23F03410 331533 333692 putative penicillin-binding protein 1A
331967	C	0.2371	G	84.19	BLOCK_109#	SPN23F03410 331533 333692 putative penicillin-binding protein 1A
331970	T	0.2388	A	62.42	BLOCK_109#	SPN23F03410 331533 333692 putative penicillin-binding protein 1A
331972	T	0.2388	G	72.36	BLOCK_109#	SPN23F03410 331533 333692 putative penicillin-binding protein 1A
331980	A	0.1891	G	45.22	BLOCK_110#	SPN23F03410 331533 333692 putative penicillin-binding protein 1A
331982	A	0.1808	G	43.41	BLOCK_110#	SPN23F03410 331533 333692 putative penicillin-binding protein 1A
331998	A	0.09287	G	10.74	DISCRETE	SPN23F03410 331533 333692 putative penicillin-binding protein 1A
332001	A	0.1891	T	45.22	BLOCK_111#	SPN23F03410 331533 333692 putative penicillin-binding protein 1A
332016	A	0.2222	T	65.57	BLOCK_111#	SPN23F03410 331533 333692 putative penicillin-binding protein 1A
332022	C	0.1692	T	261.6	DISCRETE	SPN23F03410 331533 333692 putative penicillin-binding protein 1A
332028	T	0.1741	A	32.61	DISCRETE	SPN23F03410 331533 333692 putative penicillin-binding protein 1A
332031	T	0.2371	C	84.19	BLOCK_112#	SPN23F03410 331533 333692 putative penicillin-binding protein 1A
332043	T	0.1476	A	NA	BLOCK_112#	SPN23F03410 331533 333692 putative penicillin-binding protein 1A
332045	G	0.2123	C	80.42	BLOCK_112#	SPN23F03410 331533 333692 putative penicillin-binding protein 1A
332049	G	0.1642	A	44.09	DISCRETE	SPN23F03410 331533 333692 putative penicillin-binding protein 1A
332055	T	0.2139	A	67.11	BLOCK_113#	SPN23F03410 331533 333692 putative penicillin-binding protein 1A
332056	C	0.2322	T	79.98	BLOCK_113#	SPN23F03410 331533 333692 putative penicillin-binding protein 1A
332057	C	0.2322	T	79.98	BLOCK_113#	SPN23F03410 331533 333692 putative penicillin-binding protein 1A
332065	A	0.04809	G	28.13	DISCRETE	SPN23F03410 331533 333692 putative penicillin-binding protein 1A
332070	G	0.2172	A	62.09	BLOCK_113#	SPN23F03410 331533 333692 putative penicillin-binding protein 1A
332082	A	0.2172	T	62.09	BLOCK_113#	SPN23F03410 331533 333692 putative penicillin-binding protein 1A
332118	C	0.1294	T	NA	BLOCK_113#	SPN23F03410 331533 333692 putative penicillin-binding protein 1A
332127	A	0.1841	G	73.5	BLOCK_114#	SPN23F03410 331533 333692 putative penicillin-binding protein 1A
332133	T	0.1841	A	93.83	BLOCK_114#	SPN23F03410 331533 333692 putative penicillin-binding protein 1A
332136	A	0.1857	T	78.13	BLOCK_114#	SPN23F03410 331533 333692 putative penicillin-binding protein 1A
332140	G	0.1774	A	72.34	BLOCK_114#	SPN23F03410 331533 333692 putative penicillin-binding protein 1A
332144	C	0.1857	T	78.13	BLOCK_114#	SPN23F03410 331533 333692 putative penicillin-binding protein 1A
332148	A	0.1857	G	100.1	BLOCK_114#	SPN23F03410 331533 333692 putative penicillin-binding protein 1A
332151	T	0.1874	C	106.4	BLOCK_114#	SPN23F03410 331533 333692 putative penicillin-binding protein 1A
332172	G	0.04478	A	NA	DISCRETE	SPN23F03410 331533 333692 putative penicillin-binding protein 1A
332186	T	0.1393	G	167.5	BLOCK_115#	SPN23F03410 331533 333692 putative penicillin-binding protein 1A
332202	G	0.1144	A	140.3	BLOCK_115#	SPN23F03410 331533 333692 putative penicillin-binding protein 1A
332204	G	0.1161	A	159.5	BLOCK_115#	SPN23F03410 331533 333692 putative penicillin-binding protein 1A
332209	A	0.1343	G	165.8	BLOCK_115#	SPN23F03410 331533 333692 putative penicillin-binding protein 1A
332232	A	0.07131	G	127.3	DISCRETE	SPN23F03410 331533 333692 putative penicillin-binding protein 1A
332247	T	0.199	C	131.7	BLOCK_116#	SPN23F03410 331533 333692 putative penicillin-binding protein 1A
332265	G	0.1459	A	93.78	BLOCK_116#	SPN23F03410 331533 333692 putative penicillin-binding protein 1A
332270	G	0.1443	T	87.48	BLOCK_116#	SPN23F03410 331533 333692 putative penicillin-binding protein 1A
332280	C	0.02488	T	68.3	DISCRETE	SPN23F03410 331533 333692 putative penicillin-binding protein 1A
332289	A	0.1111	G	NA	BLOCK_116#	SPN23F03410 331533 333692 putative penicillin-binding protein 1A
332304	G	0.1244	A	131.1	BLOCK_117#	SPN23F03410 331533 333692 putative penicillin-binding protein 1A
332309	C	0.09287	A	NA	BLOCK_117#	SPN23F03410 331533 333692 putative penicillin-binding protein 1A
332310	A	0.1244	G	131.1	BLOCK_117#	SPN23F03410 331533 333692 putative penicillin-binding protein 1A
332313	A	0.1078	G	54.1	BLOCK_118#	SPN23F03410 331533 333692 putative penicillin-binding protein 1A
332318	G	0.01824	T	42.17	DISCRETE	SPN23F03410 331533 333692 putative penicillin-binding protein 1A
332325	A	0.1692	G	313.6	BLOCK_118#	SPN23F03410 331533 333692 putative penicillin-binding protein 1A
332334	A	0.09287	T	NA	BLOCK_118#	SPN23F03410 331533 333692 putative penicillin-binding protein 1A
332346	A	0.07794	T	NA	BLOCK_118#	SPN23F03410 331533 333692 putative penicillin-binding protein 1A
332703	T	0.2106	A	74.68	BLOCK_118#	SPN23F03410 331533 333692 putative penicillin-binding protein 1A
332715	A	0.209	T	74.68	BLOCK_118#	SPN23F03410 331533 333692 putative penicillin-binding protein 1A
332724	A	0.2073	T	73.25	BLOCK_118#	SPN23F03410 331533 333692 putative penicillin-binding protein 1A
332727	G	0.2073	A	73.25	BLOCK_118#	SPN23F03410 331533 333692 putative penicillin-binding protein 1A
332730	A	0.2073	G	73.25	BLOCK_118#	SPN23F03410 331533 333692 putative penicillin-binding protein 1A
332732	A	0.2073	C	73.25	BLOCK_118#	SPN23F03410 331533 333692 putative penicillin-binding protein 1A
332733	G	0.2073	A	73.25	BLOCK_118#	SPN23F03410 331533 333692 putative penicillin-binding protein 1A
332745	G	0.2073	T	73.25	BLOCK_118#	SPN23F03410 331533 333692 putative penicillin-binding protein 1A
332747	A	0.2073	T	73.25	BLOCK_118#	SPN23F03410 331533 333692 putative penicillin-binding protein 1A
332748	G	0.2172	A	74.5	BLOCK_118#	SPN23F03410 331533 333692 putative penicillin-binding protein 1A
332754	G	0.2073	A	73.25	BLOCK_118#	SPN23F03410 331533 333692 putative penicillin-binding protein 1A
332799	A	0.1327	G	69.3	DISCRETE	SPN23F03410 331533 333692 putative penicillin-binding protein 1A
332814	A	0.2056	T	69.3	BLOCK_119#	SPN23F03410 331533 333692 putative penicillin-binding protein 1A
332817	T	0.2056	G	69.3	BLOCK_119#	SPN23F03410 331533 333692 putative penicillin-binding protein 1A
332829	T	0.02653	G	11.52	DISCRETE	SPN23F03410 331533 333692 putative penicillin-binding protein 1A
332832	A	0.2056	T	69.3	BLOCK_119#	SPN23F03410 331533 333692 putative penicillin-binding protein 1A
332840	G	0.204	C	64.94	BLOCK_119#	SPN23F03410 331533 333692 putative penicillin-binding protein 1A
332859	C	0.204	T	64.94	BLOCK_119#	SPN23F03410 331533 333692 putative penicillin-binding protein 1A
332973	A	0.05804	G	31.4	DISCRETE	SPN23F03410 331533 333692 putative penicillin-binding protein 1A
333204	T	0.1642	C	NA	BLOCK_120#	SPN23F03410 331533 333692 putative penicillin-binding protein 1A
333792	C	0.1874	T	19.37	BLOCK_120#	SPN23F03420 333689 334285 putative recombination protein U
333996	G	0.1741	A	32.27	BLOCK_121#	SPN23F03420 333689 334285 putative recombination protein U
334107	C	0.1725	T	28.04	BLOCK_121#	SPN23F03420 333689 334285 putative recombination protein U
334136	G	0.1725	A	28.04	BLOCK_121#	SPN23F03420 333689 334285 putative recombination protein U
334142	G	0.1891	A	7.131	BLOCK_121#	SPN23F03420 333689 334285 putative recombination protein U
334242	T	0.1542	G	6.94	BLOCK_121#	SPN23F03420 333689 334285 putative recombination protein U
334264	G	0.1725	C	28.04	BLOCK_121#	SPN23F03420 333689 334285 putative recombination protein U
334316	C	0.1592	T	28.04	BLOCK_121#	intergenic
334708	T	0.1841	C	0.1123	BLOCK_121#	SPN23F03430 334352 334879 conserved hypothetical protein
334987	T	0.141	A	6.162	BLOCK_121#	SPN23F03440 334949 335290 DivIVA protein
335014	G	0.1575	C	NA	BLOCK_121#	SPN23F03440 334949 335290 DivIVA protein
335019	G	0.1609	A	28.04	BLOCK_121#	SPN23F03440 334949 335290 DivIVA protein
335020	C	0.08789	T	28.04	BLOCK_121#	SPN23F03440 334949 335290 DivIVA protein
335023	G	0.1609	A	28.04	BLOCK_121#	SPN23F03440 334949 335290 DivIVA protein
335035	T	0.08789	C	28.04	BLOCK_121#	SPN23F03440 334949 335290 DivIVA protein
335104	G	0.08789	A	28.04	BLOCK_121#	SPN23F03440 334949 335290 DivIVA protein
336178	T	0.08955	C	0.1179	BLOCK_122#	SPN23F03450 335776 336933 putative RNA methylase family protein
336535	A	0.1426	G	0.1454	BLOCK_122#	SPN23F03450 335776 336933 putative RNA methylase family protein
336544	T	0.1874	C	0.179	BLOCK_123#	SPN23F03450 335776 336933 putative RNA methylase family protein
337964	T	0.08126	C	164.5	BLOCK_123#	SPN23F03460 336946 338340 putative membrane protein
338511	T	0.08126	C	164.5	BLOCK_123#	SPN23F03470 338416 339840 6-phosphogluconate dehydrogenase, decarboxylating
339057	A	0.2156	G	5.797	DISCRETE	SPN23F03470 338416 339840 6-phosphogluconate dehydrogenase, decarboxylating
342512	A	0.1111	G	87.32	BLOCK_124#	SPN23F03500 341756 342988 putative Major Facilitator Superfamily protein
342857	T	0.141	C	35.76	BLOCK_124#	SPN23F03500 341756 342988 putative Major Facilitator Superfamily protein
342991	A	0.3068	T	0.1567	BLOCK_124#	intergenic
343083	A	0.1177	G	27.93	BLOCK_125#	intergenic
344284	G	0.325	A	0.1827	BLOCK_125#	intergenic
344776	A	0.1559	G	0.09887	BLOCK_125#	SPN23F03520 344745 344867 choline binding protein (fragment)
347044	T	0.09453	C	NA	BLOCK_125#	SPN23F03550 346789 347796 phosphomevalonate kinase
347118	T	0.1012	C	20.54	DISCRETE	SPN23F03550 346789 347796 phosphomevalonate kinase
347297	C	0.3665	T	0.1341	DISCRETE	SPN23F03550 346789 347796 phosphomevalonate kinase
350419	A	0.1575	G	12.18	DISCRETE	SPN23F03580 349562 350557 sensor histidine kinase
350462	A	0.1658	C	11.17	BLOCK_126#	SPN23F03580 349562 350557 sensor histidine kinase
351449	A	0.0995	G	NA	BLOCK_126#	SPN23F03600 351204 351973 putative DNA alkylation repair enzyme (pseudogene)
352654	A	0.07131	C	NA	BLOCK_126#	SPN23F03640 352443 353264 choline binding protein G
372339	C	0.2007	T	0.1498	DISCRETE	SPN23F03840 371365 372687 sodium:alanine symporter family protein
372408	T	0.2007	C	0.1498	BLOCK_127#	SPN23F03840 371365 372687 sodium:alanine symporter family protein
372884	C	0.0796	T	0	BLOCK_127#	intergenic
372967	G	0.09287	A	12.44	BLOCK_127#	SPN23F03850 372905 373453 putative decarboxylase
374012	G	0.1559	T	0.04871	BLOCK_127#	SPN23F03860 373563 374462 putative C4-dicarboxylate transporter
374025	C	0.07794	T	0	BLOCK_127#	SPN23F03860 373563 374462 putative C4-dicarboxylate transporter
374889	A	0.1658	T	7.314	BLOCK_127#	SPN23F03870 374487 375761 seryl-tRNA synthetase
374934	G	0.08955	A	9.907	BLOCK_127#	SPN23F03870 374487 375761 seryl-tRNA synthetase
374940	T	0.08955	C	9.907	BLOCK_127#	SPN23F03870 374487 375761 seryl-tRNA synthetase
375315	A	0.1642	G	0.04714	BLOCK_127#	SPN23F03870 374487 375761 seryl-tRNA synthetase
375866	C	0.2454	T	4.643	BLOCK_127#	intergenic
376769	A	0.1609	G	9.882	BLOCK_127#	SPN23F03890 376349 377713 putative aspartokinase
377334	G	0.07794	A	0	BLOCK_127#	SPN23F03890 376349 377713 putative aspartokinase
377932	C	0.4428	A	4.216	BLOCK_128#	intergenic
377935	C	0.1758	A	7.602	BLOCK_128#	intergenic
377949	C	0.2769	T	5.589	DISCRETE	intergenic
378496	C	0.1609	T	9.882	BLOCK_129#	SPN23F03900 378038 378823 enoyl-CoA hydratase/isomerase family protein
379228	G	0.1924	A	0.1036	BLOCK_129#	SPN23F03910 378917 379351 MarR family regulatory protein
379932	G	0.07629	A	54.61	BLOCK_129#	SPN23F03920 379351 380325 3-oxoacyl-[acyl-carrier-protein] synthase III
380964	C	0.06633	T	15.32	DISCRETE	SPN23F03940 380728 381702 enoyl-ACP reductase
381208	G	0.2886	A	0.1927	DISCRETE	SPN23F03940 380728 381702 enoyl-ACP reductase
381679	A	0.4411	G	0.1985	DISCRETE	SPN23F03940 380728 381702 enoyl-ACP reductase
381781	C	0.4693	T	3.828	BLOCK_130#	SPN23F03950 381695 382615 putative putative malonyl CoA-acyl carrier protein transacylase
382061	A	0.2305	G	0.02428	BLOCK_130#	SPN23F03950 381695 382615 putative putative malonyl CoA-acyl carrier protein transacylase
382309	A	0.3781	T	0.2269	BLOCK_131#	SPN23F03950 381695 382615 putative putative malonyl CoA-acyl carrier protein transacylase
382845	T	0.07463	C	154.5	BLOCK_131#	SPN23F03960 382649 383380 3-oxoacyl-[acyl-carrier protein] reductase
382994	A	0.08624	G	0	BLOCK_131#	SPN23F03960 382649 383380 3-oxoacyl-[acyl-carrier protein] reductase
383351	G	0.461	A	8.556	BLOCK_131#	SPN23F03960 382649 383380 3-oxoacyl-[acyl-carrier protein] reductase
384046	G	0.07794	A	11.47	BLOCK_131#	SPN23F03970 383402 384637 3-oxoacyl-[acyl-carrier-protein] synthase II
384119	T	0.3698	C	0.2796	BLOCK_132#	SPN23F03970 383402 384637 3-oxoacyl-[acyl-carrier-protein] synthase II
384466	C	0.3831	T	0.2713	BLOCK_132#	SPN23F03970 383402 384637 3-oxoacyl-[acyl-carrier-protein] synthase II
384750	A	0.3831	G	0.2174	BLOCK_132#	SPN23F03980 384640 385125 biotin carboxyl carrier protein of acetyl-CoA carboxylase
384960	T	0.2255	C	0.01196	BLOCK_132#	SPN23F03980 384640 385125 biotin carboxyl carrier protein of acetyl-CoA carboxylase
385151	C	0.2504	T	5.081	BLOCK_132#	SPN23F03990 385122 385544 (3R)-hydroxymyristoyl-[acyl carrier protein] dehydratase
385196	G	0.1874	A	3.758	BLOCK_132#	SPN23F03990 385122 385544 (3R)-hydroxymyristoyl-[acyl carrier protein] dehydratase
385238	C	0.3151	T	4.729	BLOCK_132#	SPN23F03990 385122 385544 (3R)-hydroxymyristoyl-[acyl carrier protein] dehydratase
385244	G	0.3201	A	4.521	BLOCK_132#	SPN23F03990 385122 385544 (3R)-hydroxymyristoyl-[acyl carrier protein] dehydratase
385385	T	0.1874	C	3.758	BLOCK_132#	SPN23F03990 385122 385544 (3R)-hydroxymyristoyl-[acyl carrier protein] dehydratase
386629	C	0.09453	T	0	BLOCK_132#	SPN23F04000 385556 386923 biotin carboxylase subunit of acetyl-CoA carboxylase
386794	A	0.1526	G	10.82	BLOCK_133#	SPN23F04000 385556 386923 biotin carboxylase subunit of acetyl-CoA carboxylase
387535	C	0.4461	T	5.11	BLOCK_133#	SPN23F04010 386960 387826 acetyl-coenzyme A carboxylase carboxyl transferase subunit beta
387664	A	0.1741	G	6.906	DISCRETE	SPN23F04010 386960 387826 acetyl-coenzyme A carboxylase carboxyl transferase subunit beta
388041	A	0.1194	G	13.05	BLOCK_134#	SPN23F04020 387823 388590 acetyl-coenzyme A carboxylase carboxyl transferase subunit alpha
388134	C	0.4992	T	9.098	BLOCK_134#	SPN23F04020 387823 388590 acetyl-coenzyme A carboxylase carboxyl transferase subunit alpha
388167	A	0.4328	G	0.1763	BLOCK_134#	SPN23F04020 387823 388590 acetyl-coenzyme A carboxylase carboxyl transferase subunit alpha
395152	G	0.07131	T	71.4	BLOCK_135#	SPN23F04120 394763 396307 peptide chain release factor 3
395212	A	0.194	T	6.694	BLOCK_135#	SPN23F04120 394763 396307 peptide chain release factor 3
395326	A	0.3582	G	3.55	BLOCK_135#	SPN23F04120 394763 396307 peptide chain release factor 3
395332	C	0.4544	T	0.2579	BLOCK_135#	SPN23F04120 394763 396307 peptide chain release factor 3
418214	C	0.07629	T	16.23	BLOCK_135#	intergenic
418353	C	0.267	T	0.2362	BLOCK_136#	intergenic
418422	G	0.3449	A	4.199	BLOCK_136#	intergenic
418444	T	0.3333	C	5.606	BLOCK_136#	intergenic
418586	T	0.257	C	6.197	BLOCK_136#	intergenic
418697	A	0.1824	G	5.564	BLOCK_136#	intergenic
418712	G	0.267	A	0.3092	BLOCK_137#	intergenic
418731	G	0.2637	A	0.3196	BLOCK_137#	intergenic
418742	G	0.2554	A	0.3156	BLOCK_137#	intergenic
418750	T	0.2637	C	0.3196	BLOCK_137#	intergenic
418752	C	0.2637	A	0.3196	BLOCK_137#	intergenic
418894	T	0.2902	C	0.3092	BLOCK_138#	intergenic
418896	C	0.07629	T	16.23	BLOCK_138#	intergenic
419034	T	0.1061	C	6.086	BLOCK_138#	intergenic
419043	C	0.1061	T	6.086	BLOCK_138#	intergenic
419050	C	0.1144	T	5.219	BLOCK_138#	intergenic
419828	T	0.05473	C	44.8	BLOCK_138#	SPN23F04350 419654 419923 PTS system, lactose-specific IIBC component (fragment)
420069	T	0.262	C	0.2309	BLOCK_139#	SPN23F04360 420048 421475 putative cation transport protein
420340	A	0.1393	G	0.1862	BLOCK_139#	SPN23F04360 420048 421475 putative cation transport protein
420501	A	0.06633	G	10.09	BLOCK_139#	SPN23F04360 420048 421475 putative cation transport protein
420618	A	0.1725	G	0.1152	BLOCK_140#	SPN23F04360 420048 421475 putative cation transport protein
420621	A	0.1675	G	0.11	BLOCK_140#	SPN23F04360 420048 421475 putative cation transport protein
420651	C	0.1708	T	0.1051	BLOCK_140#	SPN23F04360 420048 421475 putative cation transport protein
420654	G	0.1741	A	0.1003	BLOCK_140#	SPN23F04360 420048 421475 putative cation transport protein
420675	C	0.4461	T	0.1346	BLOCK_140#	SPN23F04360 420048 421475 putative cation transport protein
420681	A	0.4461	G	0.1346	BLOCK_140#	SPN23F04360 420048 421475 putative cation transport protein
420684	T	0.4461	A	0.1346	BLOCK_140#	SPN23F04360 420048 421475 putative cation transport protein
420699	A	0.194	G	0.09553	BLOCK_141#	SPN23F04360 420048 421475 putative cation transport protein
420701	C	0.194	T	0.09553	BLOCK_141#	SPN23F04360 420048 421475 putative cation transport protein
420702	C	0.194	G	0.09553	BLOCK_141#	SPN23F04360 420048 421475 putative cation transport protein
420714	A	0.194	G	0.09553	BLOCK_141#	SPN23F04360 420048 421475 putative cation transport protein
420729	A	0.2255	G	0.07984	BLOCK_141#	SPN23F04360 420048 421475 putative cation transport protein
420752	A	0.2255	G	0.07984	BLOCK_141#	SPN23F04360 420048 421475 putative cation transport protein
420759	T	0.2255	G	0.07984	BLOCK_141#	SPN23F04360 420048 421475 putative cation transport protein
420765	A	0.2255	G	0.07984	BLOCK_141#	SPN23F04360 420048 421475 putative cation transport protein
420789	A	0.2222	G	0.08392	BLOCK_142#	SPN23F04360 420048 421475 putative cation transport protein
420807	A	0.2222	G	0.08392	BLOCK_142#	SPN23F04360 420048 421475 putative cation transport protein
420882	G	0.3947	A	0.1105	BLOCK_142#	SPN23F04360 420048 421475 putative cation transport protein
420912	A	0.2289	G	0.07127	BLOCK_142#	SPN23F04360 420048 421475 putative cation transport protein
420918	G	0.2289	A	0.07127	BLOCK_142#	SPN23F04360 420048 421475 putative cation transport protein
420923	T	0.2289	G	0.07127	BLOCK_142#	SPN23F04360 420048 421475 putative cation transport protein
420924	G	0.2289	A	0.07127	BLOCK_142#	SPN23F04360 420048 421475 putative cation transport protein
420939	G	0.2289	A	0.06074	BLOCK_142#	SPN23F04360 420048 421475 putative cation transport protein
420959	A	0.2272	G	0.06238	BLOCK_142#	SPN23F04360 420048 421475 putative cation transport protein
420975	A	0.2272	G	0.06238	BLOCK_142#	SPN23F04360 420048 421475 putative cation transport protein
420981	G	0.2272	A	0.06238	BLOCK_142#	SPN23F04360 420048 421475 putative cation transport protein
420990	A	0.2289	T	0.06074	BLOCK_142#	SPN23F04360 420048 421475 putative cation transport protein
421008	T	0.2289	C	0.06074	BLOCK_142#	SPN23F04360 420048 421475 putative cation transport protein
421011	T	0.2289	C	0.06074	BLOCK_142#	SPN23F04360 420048 421475 putative cation transport protein
421020	A	0.2289	G	0.06074	BLOCK_142#	SPN23F04360 420048 421475 putative cation transport protein
421130	T	0.3947	C	0.1644	DISCRETE	SPN23F04360 420048 421475 putative cation transport protein
421941	A	0.4179	T	5.151	BLOCK_143#	SPN23F04370 421491 422840 putative cation transport protein
422145	T	0.2371	C	0.2226	BLOCK_143#	SPN23F04370 421491 422840 putative cation transport protein
422283	C	0.1575	A	6.214	BLOCK_144#	SPN23F04370 421491 422840 putative cation transport protein
422546	T	0.1045	G	0	BLOCK_144#	SPN23F04370 421491 422840 putative cation transport protein
423510	C	0.1376	A	0	BLOCK_144#	SPN23F04380 423028 423876 conserved hypothetical protein
424073	A	0.08458	G	8.852	BLOCK_145#	SPN23F04390 423891 424439 putative membrane protein
424194	A	0.2786	G	4.373	BLOCK_145#	SPN23F04390 423891 424439 putative membrane protein
424229	T	0.3267	C	5.866	BLOCK_145#	SPN23F04390 423891 424439 putative membrane protein
424307	A	0.08458	G	8.852	BLOCK_145#	SPN23F04390 423891 424439 putative membrane protein
424506	G	0.2521	A	5.05	BLOCK_146#	SPN23F04400 424446 424703 putative uncharacterized protein
424511	A	0.1061	G	14.74	BLOCK_146#	SPN23F04400 424446 424703 putative uncharacterized protein
424541	G	0.1559	T	5.786	BLOCK_147#	SPN23F04400 424446 424703 putative uncharacterized protein
424542	T	0.1559	G	5.833	BLOCK_147#	SPN23F04400 424446 424703 putative uncharacterized protein
425466	G	0.2869	A	0.1891	BLOCK_147#	SPN23F04410 424805 426487 ABC transporter ATP-binding protein
427698	G	0.2023	A	10.65	DISCRETE	SPN23F04430 427495 427998 SpoU rRNA methylase family protein
428206	C	0.204	T	0.1265	DISCRETE	intergenic
428487	T	0.3068	C	0.2132	DISCRETE	SPN23F04440 428451 429014 putative membrane protein
428796	A	0.3765	G	4.742	BLOCK_148#	SPN23F04440 428451 429014 putative membrane protein
429172	T	0.3433	G	0.1643	BLOCK_148#	SPN23F04450 429004 429654 PAP2 superfamily protein
429348	T	0.2206	C	8.338	BLOCK_149#	SPN23F04450 429004 429654 PAP2 superfamily protein
429399	A	0.408	G	4.882	BLOCK_149#	SPN23F04450 429004 429654 PAP2 superfamily protein
429409	C	0.3698	T	6.011	DISCRETE	SPN23F04450 429004 429654 PAP2 superfamily protein
429424	C	0.3317	T	0.1447	BLOCK_150#	SPN23F04450 429004 429654 PAP2 superfamily protein
429432	C	0.3317	T	0.1447	BLOCK_150#	SPN23F04450 429004 429654 PAP2 superfamily protein
429438	C	0.3317	T	0.1447	BLOCK_150#	SPN23F04450 429004 429654 PAP2 superfamily protein
429444	A	0.3317	G	0.1447	BLOCK_150#	SPN23F04450 429004 429654 PAP2 superfamily protein
429447	A	0.3317	G	0.1447	BLOCK_150#	SPN23F04450 429004 429654 PAP2 superfamily protein
429454	A	0.3317	G	0.1447	BLOCK_150#	SPN23F04450 429004 429654 PAP2 superfamily protein
429455	C	0.1061	A	0.002105	BLOCK_150#	SPN23F04450 429004 429654 PAP2 superfamily protein
429458	A	0.3698	C	6.011	BLOCK_150#	SPN23F04450 429004 429654 PAP2 superfamily protein
429459	G	0.3698	A	6.011	BLOCK_150#	SPN23F04450 429004 429654 PAP2 superfamily protein
429606	T	0.2156	C	11.27	BLOCK_150#	SPN23F04450 429004 429654 PAP2 superfamily protein
429791	G	0.06468	C	380.8	BLOCK_150#	SPN23F04460 429682 430071 putative uncharacterized protein
429976	A	0.1194	G	8.934	BLOCK_150#	SPN23F04460 429682 430071 putative uncharacterized protein
430228	A	0.06468	T	380.8	BLOCK_151#	SPN23F04470 430076 430525 acetyltransferase (GNAT) family protein
430436	T	0.1061	C	0.002092	BLOCK_151#	SPN23F04470 430076 430525 acetyltransferase (GNAT) family protein
431542	T	0.09619	C	9.583	BLOCK_151#	intergenic
431674	C	0.3698	T	0.1207	BLOCK_151#	SPN23F04500 431630 433237 putative CTP synthase
431917	T	0.07629	C	39.19	BLOCK_151#	SPN23F04500 431630 433237 putative CTP synthase
432478	T	0.09453	C	6.265	BLOCK_152#	SPN23F04500 431630 433237 putative CTP synthase
432597	C	0.3499	T	3.904	BLOCK_152#	SPN23F04500 431630 433237 putative CTP synthase
433114	A	0.06468	G	380.8	BLOCK_153#	SPN23F04500 431630 433237 putative CTP synthase
433306	A	0.1061	G	0.002105	BLOCK_153#	intergenic
433508	A	0.4245	G	3.855	BLOCK_153#	intergenic
433655	G	0.1907	C	0.03261	BLOCK_153#	intergenic
462086	T	0.06302	C	484.5	BLOCK_153#	SPN23F04740 461849 462580 ABC transporter ATP-binding protein
469518	T	0.06302	C	484.5	BLOCK_153#	SPN23F04810 468461 470014 putative bacteriocin transport/processing ATP-binding protein BlpA
511188	T	0.3516	C	30.37	DISCRETE	SPN23F05290 510635 512884 5-methyltetrahydropteroyltriglutamate--homocyst eine methyltransferase
530691	T	0.3698	C	11.72	DISCRETE	intergenic
534969	A	0.05638	G	NA	DISCRETE	SPN23F05500 534525 535283 putative glutamine transporter, ATP-binding protein
552933	T	0.06633	C	0	DISCRETE	SPN23F05660 552371 553408 M42 glutamyl aminopeptidase
578560	G	0.09453	T	NA	DISCRETE	intergenic
598033	T	0.1907	C	21.7	BLOCK_154#	SPN23F06000 596905 598626 putative chorismate binding enzyme
598035	A	0.2056	G	23.5	BLOCK_154#	SPN23F06000 596905 598626 putative chorismate binding enzyme
598044	T	0.2338	A	14.58	BLOCK_154#	SPN23F06000 596905 598626 putative chorismate binding enzyme
598047	A	0.2189	G	13.48	BLOCK_154#	SPN23F06000 596905 598626 putative chorismate binding enzyme
598048	A	0.2753	G	14.58	BLOCK_154#	SPN23F06000 596905 598626 putative chorismate binding enzyme
598059	A	0.2189	G	13.48	BLOCK_154#	SPN23F06000 596905 598626 putative chorismate binding enzyme
598062	A	0.2189	G	13.48	BLOCK_154#	SPN23F06000 596905 598626 putative chorismate binding enzyme
598065	A	0.2189	C	13.48	BLOCK_154#	SPN23F06000 596905 598626 putative chorismate binding enzyme
598080	A	0.2338	T	14.58	BLOCK_154#	SPN23F06000 596905 598626 putative chorismate binding enzyme
598095	G	0.2007	A	15.08	BLOCK_154#	SPN23F06000 596905 598626 putative chorismate binding enzyme
610528	G	0.257	A	10.1	DISCRETE	SPN23F06150 610129 610854 putative ribosomal small subunit pseudouridine synthase A
614310	T	0.06633	C	NA	BLOCK_155#	SPN23F06190 613878 614501 putative membrane protein
618161	C	0.06633	A	NA	BLOCK_155#	SPN23F06230 618002 619060 putative UDP-N-acetylglucosamine-N-acetylmuramyl-(pentapeptide)pyr ophosphoryl-undecaprenol N-acetylglucosamine transferase
623921	G	0.4859	A	0.2371	BLOCK_155#	SPN23F06290 623312 624064 putative membrane protein
623999	G	0.1841	A	8.711	BLOCK_155#	SPN23F06290 623312 624064 putative membrane protein
624097	A	0.07794	G	44.12	BLOCK_155#	SPN23F06300 624068 624772 putative membrane protein
624415	T	0.2172	C	7.44	BLOCK_156#	SPN23F06300 624068 624772 putative membrane protein
624785	C	0.4013	T	4.365	BLOCK_156#	SPN23F06310 624769 625416 heme exporter protein A (cytochrome C-type biogenesis protein)
625745	A	0.1725	G	8.86	BLOCK_156#	SPN23F06320 625496 626357 putative periplasmic solute-binding transport protein (pseudogene)
626221	T	0.131	A	4.288	DISCRETE	SPN23F06320 625496 626357 putative periplasmic solute-binding transport protein (pseudogene)
626384	A	0.1841	G	0.2074	DISCRETE	SPN23F06340 626369 627127 amino-acid ABC transporter ATP-binding protein
626840	T	0.06799	C	NA	BLOCK_157#	SPN23F06340 626369 627127 amino-acid ABC transporter ATP-binding protein
627101	T	0.07131	C	49.19	BLOCK_157#	SPN23F06340 626369 627127 amino-acid ABC transporter ATP-binding protein
627331	T	0.07131	G	49.19	BLOCK_157#	SPN23F06350 627128 627805 amino-acid ABC transporter integral membrane protein
627424	A	0.06799	C	NA	BLOCK_157#	SPN23F06350 627128 627805 amino-acid ABC transporter integral membrane protein
628153	T	0.1211	C	0.2305	BLOCK_157#	SPN23F06360 627765 628385 putative amino-acid ABC transporter integral membrane protein
628306	A	0.2604	G	15.5	BLOCK_157#	SPN23F06360 627765 628385 putative amino-acid ABC transporter integral membrane protein
628622	C	0.262	T	17.54	BLOCK_157#	intergenic
628652	G	0.4561	A	0.1192	BLOCK_157#	intergenic
629140	A	0.3217	G	4.23	DISCRETE	SPN23F06380 628933 630423 lysyl-tRNA synthetase
629445	C	0.4113	T	0.03827	DISCRETE	SPN23F06380 628933 630423 lysyl-tRNA synthetase
629658	T	0.2753	C	3.789	DISCRETE	SPN23F06380 628933 630423 lysyl-tRNA synthetase
629739	C	0.4328	T	6.483	BLOCK_158#	SPN23F06380 628933 630423 lysyl-tRNA synthetase
629781	T	0.2537	C	5.839	BLOCK_158#	SPN23F06380 628933 630423 lysyl-tRNA synthetase
629814	T	0.2902	C	4.747	BLOCK_158#	SPN23F06380 628933 630423 lysyl-tRNA synthetase
629955	A	0.3648	G	0.1749	BLOCK_158#	SPN23F06380 628933 630423 lysyl-tRNA synthetase
630135	T	0.09121	C	0	BLOCK_158#	SPN23F06380 628933 630423 lysyl-tRNA synthetase
630252	T	0.2687	C	0.1321	BLOCK_159#	SPN23F06380 628933 630423 lysyl-tRNA synthetase
630282	C	0.2736	A	0.1877	BLOCK_159#	SPN23F06380 628933 630423 lysyl-tRNA synthetase
630402	A	0.08789	G	16.31	BLOCK_159#	SPN23F06380 628933 630423 lysyl-tRNA synthetase
630439	G	0.09619	C	56.81	BLOCK_159#	intergenic
630445	T	0.1774	C	7.733	BLOCK_159#	intergenic
630569	T	0.476	G	0.1051	DISCRETE	intergenic
634958	A	0.07463	G	18.87	DISCRETE	SPN23F06430 634520 635149 thiamine-phosphate pyrophosphorylase
663611	G	0.06468	A	489.6	BLOCK_160#	intergenic
696153	T	0.2852	C	21.52	BLOCK_160#	SPN23F07120 695524 696225 ABC transporter ATP-binding protein
696433	T	0.2886	G	15.08	BLOCK_160#	SPN23F07130 696227 697486 putative permease
696455	T	0.2886	G	15.08	BLOCK_160#	SPN23F07130 696227 697486 putative permease
696485	A	0.2869	G	13.08	BLOCK_160#	SPN23F07130 696227 697486 putative permease
702877	A	0.09784	G	0	DISCRETE	SPN23F07200 702403 703101 putative short chain dehydrogenase
702897	T	0.07131	C	NA	BLOCK_161#	SPN23F07200 702403 703101 putative short chain dehydrogenase
704775	A	0.3167	C	3.518	BLOCK_161#	SPN23F07230 704369 705238 putative PEP-utilizing enzyme
705735	T	0.06799	A	NA	BLOCK_162#	intergenic
706498	C	0.4876	T	4.881	BLOCK_162#	SPN23F07250 705776 708322 putative lysyl-aminopeptidase
706573	T	0.09121	C	NA	BLOCK_162#	SPN23F07250 705776 708322 putative lysyl-aminopeptidase
706984	C	0.4925	T	4.566	BLOCK_163#	SPN23F07250 705776 708322 putative lysyl-aminopeptidase
707732	C	0.4146	A	0.1776	BLOCK_163#	SPN23F07250 705776 708322 putative lysyl-aminopeptidase
707781	A	0.4163	G	0.1768	BLOCK_163#	SPN23F07250 705776 708322 putative lysyl-aminopeptidase
708016	T	0.1078	C	83.78	BLOCK_163#	SPN23F07250 705776 708322 putative lysyl-aminopeptidase
710186	A	0.2222	G	0.1328	BLOCK_163#	SPN23F07270 709854 710528 response regulator protein
710385	T	0.06799	C	97.37	BLOCK_163#	SPN23F07270 709854 710528 response regulator protein
711039	A	0.131	G	16.84	BLOCK_164#	SPN23F07280 710518 711852 sensor histidine kinase
711426	T	0.4859	C	0.2397	BLOCK_164#	SPN23F07280 710518 711852 sensor histidine kinase
711690	A	0.4096	G	4.322	BLOCK_165#	SPN23F07280 710518 711852 sensor histidine kinase
712126	C	0.06633	T	NA	BLOCK_165#	SPN23F07290 711886 712173 putative membrane protein
712417	T	0.2869	C	0.2279	BLOCK_165#	SPN23F07300 712313 713242 putative peptidase
712702	G	0.06633	A	NA	BLOCK_165#	SPN23F07300 712313 713242 putative peptidase
713113	T	0.1227	C	9.275	BLOCK_165#	SPN23F07300 712313 713242 putative peptidase
713137	T	0.2521	C	0.2862	BLOCK_165#	SPN23F07300 712313 713242 putative peptidase
713142	C	0.2521	A	0.2862	BLOCK_165#	SPN23F07300 712313 713242 putative peptidase
713694	A	0.07131	G	32.46	BLOCK_165#	SPN23F07310 713442 715892 putative exonuclease
713840	T	0.1758	C	0.09825	BLOCK_165#	SPN23F07310 713442 715892 putative exonuclease
715004	G	0.2355	A	0.2635	BLOCK_166#	SPN23F07310 713442 715892 putative exonuclease
715010	G	0.2454	A	6.264	BLOCK_166#	SPN23F07310 713442 715892 putative exonuclease
715015	A	0.2355	G	0.2635	BLOCK_166#	SPN23F07310 713442 715892 putative exonuclease
715280	T	0.3217	C	4.244	DISCRETE	SPN23F07310 713442 715892 putative exonuclease
715440	G	0.1095	A	0.06609	BLOCK_167#	SPN23F07310 713442 715892 putative exonuclease
715589	A	0.1542	G	10.82	BLOCK_167#	SPN23F07310 713442 715892 putative exonuclease
715614	T	0.1559	C	9.737	BLOCK_167#	SPN23F07310 713442 715892 putative exonuclease
715645	G	0.09287	A	0	BLOCK_167#	SPN23F07310 713442 715892 putative exonuclease
715776	A	0.1609	G	0.1545	BLOCK_167#	SPN23F07310 713442 715892 putative exonuclease
715793	T	0.1642	C	7.473	BLOCK_167#	SPN23F07310 713442 715892 putative exonuclease
715826	A	0.2056	G	8.035	DISCRETE	SPN23F07310 713442 715892 putative exonuclease
716210	A	0.1874	C	10.82	BLOCK_168#	SPN23F07320 715929 717152 putative peptidoglycan biosynthesis membrane protein
716294	T	0.1874	C	10.82	BLOCK_168#	SPN23F07320 715929 717152 putative peptidoglycan biosynthesis membrane protein
716618	T	0.08292	C	0	BLOCK_168#	SPN23F07320 715929 717152 putative peptidoglycan biosynthesis membrane protein
716627	C	0.4561	T	5.382	BLOCK_168#	SPN23F07320 715929 717152 putative peptidoglycan biosynthesis membrane protein
717039	T	0.2305	C	0.212	BLOCK_168#	SPN23F07320 715929 717152 putative peptidoglycan biosynthesis membrane protein
717084	T	0.2305	C	0.212	BLOCK_168#	SPN23F07320 715929 717152 putative peptidoglycan biosynthesis membrane protein
717331	A	0.2305	G	6.115	DISCRETE	SPN23F07330 717163 717717 DJ-1/PfpI family protein
718070	T	0.4627	A	4.198	DISCRETE	SPN23F07340 717802 718365 putative haloacid dehalogenase-like hydrolase
718076	T	0.2687	C	0.2875	BLOCK_169#	SPN23F07340 717802 718365 putative haloacid dehalogenase-like hydrolase
718697	C	0.4444	T	3.643	BLOCK_169#	SPN23F07350 718380 720326 DNA gyrase subunit B
718802	T	0.3698	C	5.434	BLOCK_169#	SPN23F07350 718380 720326 DNA gyrase subunit B
718805	C	0.3698	T	5.434	BLOCK_169#	SPN23F07350 718380 720326 DNA gyrase subunit B
718811	T	0.3698	C	5.434	BLOCK_169#	SPN23F07350 718380 720326 DNA gyrase subunit B
718853	C	0.3101	T	4.322	BLOCK_170#	SPN23F07350 718380 720326 DNA gyrase subunit B
718865	A	0.3101	G	4.322	BLOCK_170#	SPN23F07350 718380 720326 DNA gyrase subunit B
718866	A	0.3101	G	4.322	BLOCK_170#	SPN23F07350 718380 720326 DNA gyrase subunit B
718868	A	0.3217	G	4.032	BLOCK_170#	SPN23F07350 718380 720326 DNA gyrase subunit B
718874	A	0.3134	G	4.167	BLOCK_170#	SPN23F07350 718380 720326 DNA gyrase subunit B
718880	G	0.3134	A	4.167	BLOCK_170#	SPN23F07350 718380 720326 DNA gyrase subunit B
718885	A	0.3134	G	4.167	BLOCK_170#	SPN23F07350 718380 720326 DNA gyrase subunit B
718889	A	0.3134	T	4.167	BLOCK_170#	SPN23F07350 718380 720326 DNA gyrase subunit B
718898	T	0.3101	G	4.322	BLOCK_171#	SPN23F07350 718380 720326 DNA gyrase subunit B
719027	T	0.2189	C	10.81	BLOCK_171#	SPN23F07350 718380 720326 DNA gyrase subunit B
719028	G	0.2189	C	10.81	BLOCK_171#	SPN23F07350 718380 720326 DNA gyrase subunit B
719102	T	0.06633	C	NA	BLOCK_171#	SPN23F07350 718380 720326 DNA gyrase subunit B
719333	C	0.2985	T	4.818	BLOCK_171#	SPN23F07350 718380 720326 DNA gyrase subunit B
721442	G	0.06633	A	NA	BLOCK_171#	SPN23F07360 720408 722135 septation ring formation regulator
721518	A	0.06633	G	NA	BLOCK_171#	SPN23F07360 720408 722135 septation ring formation regulator
722435	T	0.1277	C	23.63	DISCRETE	intergenic
722647	C	0.4063	A	5.108	BLOCK_172#	intergenic
722653	T	0.1194	G	0.1855	BLOCK_172#	intergenic
722673	G	0.4959	A	3.74	DISCRETE	intergenic
723883	T	0.2537	C	0.225	BLOCK_173#	intergenic
723904	A	0.1327	G	3.864	BLOCK_173#	intergenic
723905	T	0.1327	A	3.864	BLOCK_173#	intergenic
723906	T	0.1327	A	3.864	BLOCK_173#	intergenic
724442	T	0.07463	C	9.67	DISCRETE	SPN23F07400 724427 725231 putative IS640-Spn1 transposase (pseudogene)
725259	C	0.2521	T	3.757	DISCRETE	intergenic
725274	C	0.2886	T	3.158	DISCRETE	intergenic
725912	T	0.1393	C	4.258	DISCRETE	SPN23F07420 725499 727757 putative ATP-dependent Clp protease ATP-binding subunit
726165	G	0.4826	A	6.376	DISCRETE	SPN23F07420 725499 727757 putative ATP-dependent Clp protease ATP-binding subunit
726807	G	0.4793	T	0.1998	DISCRETE	SPN23F07420 725499 727757 putative ATP-dependent Clp protease ATP-binding subunit
727071	G	0.06633	A	NA	BLOCK_174#	SPN23F07420 725499 727757 putative ATP-dependent Clp protease ATP-binding subunit
727410	G	0.07131	A	88.47	BLOCK_174#	SPN23F07420 725499 727757 putative ATP-dependent Clp protease ATP-binding subunit
727547	A	0.08292	G	64.05	BLOCK_174#	SPN23F07420 725499 727757 putative ATP-dependent Clp protease ATP-binding subunit
727959	A	0.1128	G	13.94	BLOCK_174#	intergenic
729272	G	0.4229	C	5.147	BLOCK_174#	SPN23F07450 729089 729823 putative glutamine transporter, ATP-binding protein 3
729385	T	0.1376	G	5.219	BLOCK_175#	SPN23F07450 729089 729823 putative glutamine transporter, ATP-binding protein 3
729415	C	0.1891	T	4.976	BLOCK_175#	SPN23F07450 729089 729823 putative glutamine transporter, ATP-binding protein 3
730231	C	0.2139	T	14.75	BLOCK_176#	SPN23F07460 729956 730834 FolD bifunctional protein [includes: methylenetetrahydrofolate dehydrogenase/methenyltetrahydrofolate cyclohydrolase]
730264	T	0.2139	C	14.75	BLOCK_176#	SPN23F07460 729956 730834 FolD bifunctional protein [includes: methylenetetrahydrofolate dehydrogenase/methenyltetrahydrofolate cyclohydrolase]
730285	C	0.2272	T	14.75	BLOCK_176#	SPN23F07460 729956 730834 FolD bifunctional protein [includes: methylenetetrahydrofolate dehydrogenase/methenyltetrahydrofolate cyclohydrolase]
730304	C	0.2272	T	14.75	BLOCK_176#	SPN23F07460 729956 730834 FolD bifunctional protein [includes: methylenetetrahydrofolate dehydrogenase/methenyltetrahydrofolate cyclohydrolase]
730309	G	0.2272	A	14.75	BLOCK_176#	SPN23F07460 729956 730834 FolD bifunctional protein [includes: methylenetetrahydrofolate dehydrogenase/methenyltetrahydrofolate cyclohydrolase]
730312	T	0.2272	C	14.75	BLOCK_176#	SPN23F07460 729956 730834 FolD bifunctional protein [includes: methylenetetrahydrofolate dehydrogenase/methenyltetrahydrofolate cyclohydrolase]
730348	T	0.2139	C	14.75	BLOCK_176#	SPN23F07460 729956 730834 FolD bifunctional protein [includes: methylenetetrahydrofolate dehydrogenase/methenyltetrahydrofolate cyclohydrolase]
730519	G	0.2172	A	14.65	BLOCK_176#	SPN23F07460 729956 730834 FolD bifunctional protein [includes: methylenetetrahydrofolate dehydrogenase/methenyltetrahydrofolate cyclohydrolase]
730591	G	0.2156	T	13.03	BLOCK_176#	SPN23F07460 729956 730834 FolD bifunctional protein [includes: methylenetetrahydrofolate dehydrogenase/methenyltetrahydrofolate cyclohydrolase]
730606	T	0.2272	C	14.75	BLOCK_176#	SPN23F07460 729956 730834 FolD bifunctional protein [includes: methylenetetrahydrofolate dehydrogenase/methenyltetrahydrofolate cyclohydrolase]
730609	T	0.2305	C	11.66	BLOCK_176#	SPN23F07460 729956 730834 FolD bifunctional protein [includes: methylenetetrahydrofolate dehydrogenase/methenyltetrahydrofolate cyclohydrolase]
730651	A	0.2289	T	13.03	BLOCK_176#	SPN23F07460 729956 730834 FolD bifunctional protein [includes: methylenetetrahydrofolate dehydrogenase/methenyltetrahydrofolate cyclohydrolase]
730687	T	0.2289	G	13.03	BLOCK_176#	SPN23F07460 729956 730834 FolD bifunctional protein [includes: methylenetetrahydrofolate dehydrogenase/methenyltetrahydrofolate cyclohydrolase]
730699	G	0.2289	A	13.03	BLOCK_176#	SPN23F07460 729956 730834 FolD bifunctional protein [includes: methylenetetrahydrofolate dehydrogenase/methenyltetrahydrofolate cyclohydrolase]
730741	T	0.2289	C	13.03	BLOCK_176#	SPN23F07460 729956 730834 FolD bifunctional protein [includes: methylenetetrahydrofolate dehydrogenase/methenyltetrahydrofolate cyclohydrolase]
730780	T	0.2289	C	13.03	BLOCK_176#	SPN23F07460 729956 730834 FolD bifunctional protein [includes: methylenetetrahydrofolate dehydrogenase/methenyltetrahydrofolate cyclohydrolase]
730846	C	0.1891	A	14.75	BLOCK_176#	intergenic
730848	G	0.1891	T	14.75	BLOCK_176#	intergenic
730851	G	0.1891	T	14.75	BLOCK_176#	intergenic
732480	T	0.02488	C	17.23	DISCRETE	SPN23F07480 731806 732645 carbohydrate kinase
732491	C	0.02488	T	17.23	DISCRETE	SPN23F07480 731806 732645 carbohydrate kinase
732501	T	0.02488	C	17.23	DISCRETE	SPN23F07480 731806 732645 carbohydrate kinase
732522	A	0.02488	G	17.23	DISCRETE	SPN23F07480 731806 732645 carbohydrate kinase
732987	T	0.02488	C	17.23	DISCRETE	SPN23F07490 732943 733626 ribose 5-phosphate isomerase A
732990	C	0.02488	G	17.23	DISCRETE	SPN23F07490 732943 733626 ribose 5-phosphate isomerase A
732992	A	0.02488	G	17.23	DISCRETE	SPN23F07490 732943 733626 ribose 5-phosphate isomerase A
733026	T	0.04478	G	30.93	DISCRETE	SPN23F07490 732943 733626 ribose 5-phosphate isomerase A
733098	G	0.05638	A	28.26	BLOCK_177#	SPN23F07490 732943 733626 ribose 5-phosphate isomerase A
733115	G	0.04478	C	30.93	DISCRETE	SPN23F07490 732943 733626 ribose 5-phosphate isomerase A
733125	T	0.04478	A	30.93	DISCRETE	SPN23F07490 732943 733626 ribose 5-phosphate isomerase A
733131	G	0.04478	C	30.93	DISCRETE	SPN23F07490 732943 733626 ribose 5-phosphate isomerase A
733143	A	0.04312	G	27.17	DISCRETE	SPN23F07490 732943 733626 ribose 5-phosphate isomerase A
733182	A	0.05638	G	28.26	BLOCK_177#	SPN23F07490 732943 733626 ribose 5-phosphate isomerase A
733185	C	0.04478	T	30.93	DISCRETE	SPN23F07490 732943 733626 ribose 5-phosphate isomerase A
733188	C	0.04478	T	30.93	DISCRETE	SPN23F07490 732943 733626 ribose 5-phosphate isomerase A
733248	G	0.04478	C	18.04	DISCRETE	SPN23F07490 732943 733626 ribose 5-phosphate isomerase A
733254	G	0.04478	A	18.04	DISCRETE	SPN23F07490 732943 733626 ribose 5-phosphate isomerase A
733260	T	0.04478	G	18.04	DISCRETE	SPN23F07490 732943 733626 ribose 5-phosphate isomerase A
733382	G	0.04478	A	18.04	DISCRETE	SPN23F07490 732943 733626 ribose 5-phosphate isomerase A
736542	T	0.1493	G	16.55	BLOCK_178#	SPN23F07530 736526 738212 putative cytolysin (pseudogene)
737772	T	0.06468	C	0	BLOCK_178#	SPN23F07530 736526 738212 putative cytolysin (pseudogene)
759477	A	0.2056	T	0.03248	BLOCK_178#	SPN23F07790 759019 759708 putative membrane protein
777189	A	0.02322	G	23.22	DISCRETE	SPN23F07970 776632 777372 DeoR family regulatory protein
867289	T	0.06633	C	0	DISCRETE	SPN23F08930 867165 867560 diacylglycerol kinase
901388	C	0.03483	T	200	DISCRETE	SPN23F09300 898830 901949 pneumococcal histidine triad protein E (Bvh-3)
910300	A	0.08458	G	50.12	DISCRETE	SPN23F09390 910279 911214 dihydrodipicolinate synthase
913710	T	0.04478	C	27.05	DISCRETE	SPN23F09430 913662 914741 peptide chain release factor 1
915986	T	0.0597	A	14.08	BLOCK_179#	SPN23F09450 915564 916166 conserved hypothetical protein
915995	A	0.05804	G	13.01	BLOCK_179#	SPN23F09450 915564 916166 conserved hypothetical protein
916106	G	0.03648	C	15.93	DISCRETE	SPN23F09450 915564 916166 conserved hypothetical protein
916115	G	0.04975	A	15.88	DISCRETE	SPN23F09450 915564 916166 conserved hypothetical protein
916162	A	0.03648	C	15.93	DISCRETE	SPN23F09450 915564 916166 conserved hypothetical protein
916163	A	0.03648	T	15.93	DISCRETE	SPN23F09450 915564 916166 conserved hypothetical protein
932543	C	0.07794	A	13.91	DISCRETE	SPN23F09630 932517 933332 putative uncharacterized protein
951134	C	0.06302	T	484.5	BLOCK_180#	intergenic
961322	T	0.2537	C	9.845	BLOCK_180#	SPN23F09940 960861 961970 RNA polymerase sigma factor RpoD
1005487	T	0.06633	C	NA	BLOCK_180#	SPN23F10410	1,4-alpha-glucan branching enzyme
1009856	T	0.06302	C	184.8	BLOCK_180#	SPN23F10440	glycogen synthase
1016426	T	0.1061	C	0	DISCRETE	SPN23F10540	putative ATP-dependent exonuclease subunit B
1021225	T	0.1874	C	12.96	BLOCK_181#	SPN23F10550	putative ATP-dependent exonuclease subunit A
1024636	G	0.1675	A	21.66	BLOCK_181#	SPN23F10580	IgA-protease
1025239	A	0.06302	G	184.8	BLOCK_181#	SPN23F10580	IgA-protease
1025263	A	0.06302	C	184.8	BLOCK_181#	SPN23F10580	IgA-protease
1059447	A	0.06468	G	380.8	BLOCK_181#	SPN23F10810	putative ribonucleoside-diphosphate reductase alpha chain
1067118	G	0.3051	A	0.1546	BLOCK_181#	SPN23F10860	putative lactose-specific phosphotransferase system (PTS), IIBC component 2
1067152	G	0.3002	A	0.1564	BLOCK_181#	SPN23F10870	PTS system, lactose-specific IIA component
1067155	C	0.2919	T	0.1633	BLOCK_181#	SPN23F10870	PTS system, lactose-specific IIA component
1067173	C	0.2919	T	0.1633	BLOCK_181#	SPN23F10870	PTS system, lactose-specific IIA component
1068649	T	0.2172	C	14.03	BLOCK_182#	SPN23F10890	tagatose 1,6-diphosphate aldolase 2
1068668	T	0.2206	A	11.06	BLOCK_182#	SPN23F10890	tagatose 1,6-diphosphate aldolase 2
1068683	A	0.2255	T	11.06	BLOCK_182#	SPN23F10890	tagatose 1,6-diphosphate aldolase 2
1068692	T	0.2172	A	14.03	BLOCK_182#	SPN23F10890	tagatose 1,6-diphosphate aldolase 2
1069037	A	0.3416	G	10.02	DISCRETE	SPN23F10890	tagatose 1,6-diphosphate aldolase 2
1079311	A	0.1376	G	8.855	BLOCK_183#	SPN23F11040	hemolysin-like protein
1079527	T	0.1376	C	8.855	BLOCK_183#	SPN23F11040	hemolysin-like protein
1079620	T	0.1376	C	8.855	BLOCK_183#	SPN23F11040	hemolysin-like protein
1080060	A	0.1294	G	26.69	BLOCK_183#	SPN23F11050	putative geranyltranstransferase
1087960	C	0.1857	T	30.13	DISCRETE	SPN23F11140	putative formate/nitrate transport protein
1100359	C	0.06302	T	484.5	DISCRETE	intergenic
1103802	A	0.06468	G	51.35	DISCRETE	SPN23F11310	MutT/NUDIX hydrolase family protein
1117194	G	0.136	T	41.7	DISCRETE	SPN23F11420	putative chromosome partition protein
1119081	G	0.03648	A	117.3	DISCRETE	SPN23F11420	putative chromosome partition protein
1119084	A	0.03648	G	117.3	DISCRETE	SPN23F11420	putative chromosome partition protein
1119102	A	0.06468	T	51.6	BLOCK_184#	SPN23F11420	putative chromosome partition protein
1119105	T	0.06468	A	51.6	BLOCK_184#	SPN23F11420	putative chromosome partition protein
1119108	G	0.03648	A	117.3	DISCRETE	SPN23F11420	putative chromosome partition protein
1119120	A	0.03648	G	117.3	DISCRETE	SPN23F11420	putative chromosome partition protein
1119135	A	0.03648	C	117.3	DISCRETE	SPN23F11420	putative chromosome partition protein
1119141	A	0.03648	G	117.3	DISCRETE	SPN23F11420	putative chromosome partition protein
1126096	T	0.1658	A	311.5	BLOCK_185#	SPN23F11500	putative 3-isopropylmalate dehydratase small subunit
1126126	T	0.1658	C	311.5	BLOCK_185#	SPN23F11500	putative 3-isopropylmalate dehydratase small subunit
1126888	C	0.05141	T	225.5	DISCRETE	SPN23F11520	3-isopropylmalate dehydrogenase
1127575	A	0.2836	G	4.331	DISCRETE	SPN23F11530	putative 2-isopropylmalate synthase (pseudogene)
1134718	T	0.1177	C	35.74	DISCRETE	SPN23F11600	SMF family protein
1144806	A	0.3881	G	0.1016	DISCRETE	SPN23F11690	carbamoyl-phosphate synthase large chain
1145065	T	0.136	C	6.054	DISCRETE	SPN23F11690	carbamoyl-phosphate synthase large chain
1145115	G	0.4527	A	4.656	BLOCK_186#	SPN23F11690	carbamoyl-phosphate synthase large chain
1145118	A	0.1227	G	6.054	BLOCK_186#	SPN23F11690	carbamoyl-phosphate synthase large chain
1145139	A	0.4975	G	0.07619	BLOCK_186#	SPN23F11690	carbamoyl-phosphate synthase large chain
1145195	T	0.4444	G	3.475	BLOCK_186#	SPN23F11690	carbamoyl-phosphate synthase large chain
1145238	A	0.466	G	16.28	DISCRETE	SPN23F11690	carbamoyl-phosphate synthase large chain
1145453	T	0.1625	C	4.981	DISCRETE	SPN23F11690	carbamoyl-phosphate synthase large chain
1146318	A	0.1459	G	5.677	BLOCK_187#	SPN23F11690	carbamoyl-phosphate synthase large chain
1146464	C	0.4378	G	4.695	BLOCK_187#	SPN23F11690	carbamoyl-phosphate synthase large chain
1148525	A	0.3682	C	5.136	DISCRETE	SPN23F11710	aspartate carbamoyltransferase
1150627	A	0.3118	G	5.269	BLOCK_188#	SPN23F11740	conserved hypothetical protein
1150702	T	0.4013	C	3.177	BLOCK_188#	SPN23F11740	conserved hypothetical protein
1150715	A	0.4013	C	3.177	BLOCK_188#	SPN23F11740	conserved hypothetical protein
1152971	C	0.1476	G	10.04	BLOCK_189#	intergenic
1152972	G	0.1459	A	10.33	BLOCK_189#	intergenic
1154309	C	0.2604	T	0.0922	DISCRETE	SPN23F11770	ABC transporter, ATP-binding protein
1170702	A	0.08458	G	23.58	DISCRETE	SPN23F11980	putative ABC transporter ATP-binding protein
1284893	G	0.3018	A	5.575	DISCRETE	SPN23F13110	putative CAAX amino terminal protease
1284923	A	0.4179	G	11.25	DISCRETE	SPN23F13110	putative CAAX amino terminal protease
1289032	A	0.2338	T	8.001	BLOCK_190#	SPN23F13190	50S ribosomal protein L7/L12
1290508	G	0.1095	T	15.95	BLOCK_190#	SPN23F13210	probable amidohydrolase
1291042	G	0.1095	A	15.95	BLOCK_190#	SPN23F13210	probable amidohydrolase
1291305	A	0.199	G	5.538	BLOCK_190#	intergenic
1291520	A	0.2206	G	6.257	BLOCK_190#	intergenic
1292093	G	0.2803	A	7.461	BLOCK_190#	SPN23F13220	ABC transporter ATP-binding membrane protein
1292684	C	0.1509	T	0.1062	BLOCK_190#	SPN23F13220	ABC transporter ATP-binding membrane protein
1292747	G	0.1725	A	0.1219	BLOCK_190#	SPN23F13220	ABC transporter ATP-binding membrane protein
1292756	C	0.1642	T	0.1062	BLOCK_190#	SPN23F13220	ABC transporter ATP-binding membrane protein
1293230	A	0.1144	G	11.48	BLOCK_190#	SPN23F13220	ABC transporter ATP-binding membrane protein
1293471	A	0.1144	C	11.48	BLOCK_190#	SPN23F13230	ABC transporter ATP-binding membrane protein
1293822	A	0.1144	G	11.48	BLOCK_190#	SPN23F13230	ABC transporter ATP-binding membrane protein
1293846	A	0.1144	G	11.48	BLOCK_190#	SPN23F13230	ABC transporter ATP-binding membrane protein
1293870	T	0.1144	C	11.48	BLOCK_190#	SPN23F13230	ABC transporter ATP-binding membrane protein
1293877	C	0.1144	A	11.48	BLOCK_190#	SPN23F13230	ABC transporter ATP-binding membrane protein
1293923	T	0.1144	C	11.48	BLOCK_190#	SPN23F13230	ABC transporter ATP-binding membrane protein
1293960	C	0.1144	T	11.48	BLOCK_190#	SPN23F13230	ABC transporter ATP-binding membrane protein
1293972	C	0.1144	A	11.48	BLOCK_190#	SPN23F13230	ABC transporter ATP-binding membrane protein
1294025	A	0.2371	C	8.759	DISCRETE	SPN23F13230	ABC transporter ATP-binding membrane protein
1307956	C	0.1111	T	6.639	BLOCK_191#	SPN23F13370	3-phosphoshikimate 1-carboxyvinyltransferase
1308175	T	0.1144	C	4.343	BLOCK_191#	SPN23F13370	3-phosphoshikimate 1-carboxyvinyltransferase
1308375	A	0.1128	G	4.523	BLOCK_192#	SPN23F13370	3-phosphoshikimate 1-carboxyvinyltransferase
1308580	T	0.4113	C	0.1008	BLOCK_192#	SPN23F13370	3-phosphoshikimate 1-carboxyvinyltransferase
1308744	G	0.3831	A	0.1258	DISCRETE	SPN23F13370	3-phosphoshikimate 1-carboxyvinyltransferase
1309199	T	0.1658	C	7.941	BLOCK_193#	intergenic
1309270	G	0.325	A	0.07434	BLOCK_193#	SPN23F13380	conserved hypothetical protein
1309636	A	0.1028	G	0.06164	BLOCK_194#	SPN23F13390	prephenate dehydrogenase
1310555	A	0.3433	G	4.688	BLOCK_194#	SPN23F13390	prephenate dehydrogenase
1310887	T	0.09287	C	0	BLOCK_195#	SPN23F13400	chorismate synthase
1311200	T	0.2139	G	5.603	BLOCK_195#	SPN23F13400	chorismate synthase
1311365	T	0.3433	G	3.764	BLOCK_195#	SPN23F13400	chorismate synthase
1311689	A	0.2604	G	4.601	BLOCK_196#	SPN23F13400	chorismate synthase
1311935	C	0.1194	T	0.02207	BLOCK_196#	SPN23F13410	3-dehydroquinate synthase
1312012	A	0.09287	G	0	BLOCK_196#	SPN23F13410	3-dehydroquinate synthase
1312024	T	0.272	C	4.641	DISCRETE	SPN23F13410	3-dehydroquinate synthase
1313060	T	0.2255	C	0.2276	DISCRETE	SPN23F13420	shikimate 5-dehydrogenase
1316983	T	0.1509	C	0.1741	BLOCK_197#	SPN23F13450	putative membrane protein
1317053	A	0.3798	G	4.747	BLOCK_197#	SPN23F13450	putative membrane protein
1341610	C	0.4859	T	7.259	DISCRETE	SPN23F13710	putative membrane protein
1343258	C	0.4992	T	12.55	BLOCK_198#	SPN23F13730	putative acyl-ACP thioesterase
1344399	A	0.1708	G	8.694	BLOCK_198#	SPN23F13740	putative oxygen-independent coproporphyrinogen III oxidase
1347156	A	0.1227	G	28.49	BLOCK_198#	SPN23F13780	HPr kinase/phosphorylase
1379673	A	0.1095	G	23.94	DISCRETE	SPN23F14150	GDSL-like Lipase/acylhydrolase family protein
1399955	A	0.07463	G	40.51	BLOCK_199#	intergenic
1403951	C	0.4428	T	15.65	BLOCK_199#	SPN23F14450	putative oxidoreductase
1531768	G	0.07794	A	22.17	BLOCK_200#	SPN23F15860	ATP-dependent Clp protease ATP-binding subunit ClpX
1531915	G	0.08789	A	35.79	BLOCK_200#	SPN23F15860	ATP-dependent Clp protease ATP-binding subunit ClpX
1532146	G	0.03648	A	59.81	DISCRETE	SPN23F15870	putative exported protein
1532176	A	0.09453	G	21.36	BLOCK_200#	SPN23F15870	putative exported protein
1532218	A	0.01327	G	NA	DISCRETE	SPN23F15880	dihydrofolate reductase
1532245	T	0.08292	C	36.29	DISCRETE	SPN23F15880	dihydrofolate reductase
1532293	T	0.06799	C	32.83	BLOCK_201#	SPN23F15880	dihydrofolate reductase
1532301	A	0.1542	G	28.88	BLOCK_201#	SPN23F15880	dihydrofolate reductase
1532305	C	0.1128	T	23.99	BLOCK_201#	SPN23F15880	dihydrofolate reductase
1532311	A	0.06468	G	34.58	BLOCK_201#	SPN23F15880	dihydrofolate reductase
1532326	C	0.1526	T	27.71	BLOCK_201#	SPN23F15880	dihydrofolate reductase
1532367	A	0.06302	G	16.54	BLOCK_201#	SPN23F15880	dihydrofolate reductase
1532368	A	0.07131	G	16.83	BLOCK_201#	SPN23F15880	dihydrofolate reductase
1532371	G	0.1542	A	18.81	BLOCK_201#	SPN23F15880	dihydrofolate reductase
1532374	C	0.07794	T	17.69	BLOCK_202#	SPN23F15880	dihydrofolate reductase
1532392	C	0.08292	T	17.69	BLOCK_202#	SPN23F15880	dihydrofolate reductase
1532445	G	0.06633	A	16.06	BLOCK_203#	SPN23F15880	dihydrofolate reductase
1532446	A	0.06633	G	11.3	BLOCK_203#	SPN23F15880	dihydrofolate reductase
1532458	A	0.1509	G	28.93	BLOCK_204#	SPN23F15880	dihydrofolate reductase
1532495	A	0.05307	G	26.23	BLOCK_204#	SPN23F15880	dihydrofolate reductase
1532535	G	0.09453	A	25.89	DISCRETE	SPN23F15880	dihydrofolate reductase
1532608	T	0.141	C	13.78	DISCRETE	SPN23F15880	dihydrofolate reductase
1533118	A	0.1675	G	0.2438	DISCRETE	SPN23F15890	Dps-like peroxide resistance protein Dpr
1533563	T	0.126	C	0.2281	DISCRETE	intergenic
1533598	G	0.1376	A	7.347	DISCRETE	intergenic
1533720	C	0.3433	A	4.135	BLOCK_205#	intergenic
1533724	A	0.1609	G	9.303	BLOCK_205#	intergenic
1533759	A	0.1376	G	0.2307	BLOCK_206#	intergenic
1534580	T	0.2952	C	4.716	BLOCK_206#	SPN23F15900	putative exported choline-binding glycosyl hydrolase
1535028	G	0.1526	A	0.1946	BLOCK_207#	SPN23F15900	putative exported choline-binding glycosyl hydrolase
1535129	A	0.1559	C	0.2602	BLOCK_207#	SPN23F15900	putative exported choline-binding glycosyl hydrolase
1535314	A	0.4395	G	5.492	BLOCK_207#	SPN23F15900	putative exported choline-binding glycosyl hydrolase
1535605	A	0.2504	G	0.1737	BLOCK_208#	SPN23F15910	triosephosphate isomerase
1535764	G	0.1526	A	0.1946	BLOCK_208#	SPN23F15910	triosephosphate isomerase
1535977	C	0.1874	T	3.692	BLOCK_208#	SPN23F15910	triosephosphate isomerase
1536536	T	0.01161	C	NA	DISCRETE	SPN23F15920	putative DNA replication protein DnaD
1536548	T	0.01161	C	NA	DISCRETE	SPN23F15920	putative DNA replication protein DnaD
1536580	A	0.01161	G	NA	DISCRETE	SPN23F15920	putative DNA replication protein DnaD
1536600	G	0.01161	A	NA	DISCRETE	SPN23F15920	putative DNA replication protein DnaD
1536610	G	0.01161	A	NA	DISCRETE	SPN23F15920	putative DNA replication protein DnaD
1536613	A	0.01161	G	NA	DISCRETE	SPN23F15920	putative DNA replication protein DnaD
1536632	A	0.01161	G	NA	DISCRETE	SPN23F15920	putative DNA replication protein DnaD
1536652	A	0.1493	G	5.308	BLOCK_208#	SPN23F15920	putative DNA replication protein DnaD
1536704	C	0.0199	T	NA	DISCRETE	SPN23F15920	putative DNA replication protein DnaD
1536779	T	0.2985	C	0.2653	DISCRETE	SPN23F15920	putative DNA replication protein DnaD
1536824	G	0.01824	A	NA	DISCRETE	SPN23F15920	putative DNA replication protein DnaD
1537008	A	0.0199	G	NA	DISCRETE	SPN23F15930	homoserine O-succinyltransferase
1537012	C	0.0199	T	NA	DISCRETE	SPN23F15930	homoserine O-succinyltransferase
1537084	C	0.0199	T	NA	DISCRETE	SPN23F15930	homoserine O-succinyltransferase
1537135	G	0.01824	A	NA	DISCRETE	SPN23F15930	homoserine O-succinyltransferase
1537150	T	0.01824	C	NA	DISCRETE	SPN23F15930	homoserine O-succinyltransferase
1537168	T	0.01824	C	NA	DISCRETE	SPN23F15930	homoserine O-succinyltransferase
1537177	C	0.0199	A	NA	DISCRETE	SPN23F15930	homoserine O-succinyltransferase
1537264	T	0.01824	C	NA	DISCRETE	SPN23F15930	homoserine O-succinyltransferase
1537327	G	0.0199	A	NA	DISCRETE	SPN23F15930	homoserine O-succinyltransferase
1537342	G	0.0199	T	NA	DISCRETE	SPN23F15930	homoserine O-succinyltransferase
1537500	C	0.0199	T	NA	DISCRETE	SPN23F15930	homoserine O-succinyltransferase
1541320	G	0.3002	A	9.171	DISCRETE	intergenic
1546990	C	0.4411	T	13.05	DISCRETE	SPN23F16030	pyridine nucleotide-disulphide oxidoreductase
1559135	G	0.08955	T	51.35	DISCRETE	intergenic
1570144	A	0.04643	G	27.14	DISCRETE	intergenic
1570201	T	0.02819	C	23.22	DISCRETE	intergenic
1593441	A	0.06468	G	380.8	BLOCK_209#	SPN23F16550	ABC transporter ATP-binding protein
1611245	T	0.08789	C	544.5	BLOCK_209#	SPN23F16720	D-alanine--D-alanine ligase
1611247	A	0.1609	G	31.08	BLOCK_209#	SPN23F16720	D-alanine--D-alanine ligase
1611269	G	0.0796	A	159.3	BLOCK_209#	SPN23F16720	D-alanine--D-alanine ligase
1611281	G	0.06302	A	159.3	BLOCK_209#	SPN23F16720	D-alanine--D-alanine ligase
1611293	G	0.1658	A	36.52	BLOCK_209#	SPN23F16720	D-alanine--D-alanine ligase
1611296	A	0.08789	G	15.58	DISCRETE	SPN23F16720	D-alanine--D-alanine ligase
1611299	A	0.06799	G	172	BLOCK_210#	SPN23F16720	D-alanine--D-alanine ligase
1611305	G	0.141	A	28.17	BLOCK_210#	SPN23F16720	D-alanine--D-alanine ligase
1611308	A	0.1443	G	29.16	BLOCK_210#	SPN23F16720	D-alanine--D-alanine ligase
1611344	T	0.0597	A	152	BLOCK_211#	SPN23F16720	D-alanine--D-alanine ligase
1611362	C	0.1658	T	36.52	BLOCK_211#	SPN23F16720	D-alanine--D-alanine ligase
1611365	A	0.1658	C	36.52	BLOCK_211#	SPN23F16720	D-alanine--D-alanine ligase
1611383	A	0.0597	G	152	BLOCK_211#	SPN23F16720	D-alanine--D-alanine ligase
1611390	A	0.0597	G	152	BLOCK_211#	SPN23F16720	D-alanine--D-alanine ligase
1611395	C	0.0597	T	152	BLOCK_211#	SPN23F16720	D-alanine--D-alanine ligase
1611404	A	0.06136	G	158.3	BLOCK_211#	SPN23F16720	D-alanine--D-alanine ligase
1611422	C	0.1327	T	22.42	BLOCK_211#	SPN23F16720	D-alanine--D-alanine ligase
1611424	G	0.1376	T	250.8	BLOCK_211#	SPN23F16720	D-alanine--D-alanine ligase
1611478	T	0.1658	C	36.52	BLOCK_211#	SPN23F16720	D-alanine--D-alanine ligase
1611479	C	0.1642	A	34.21	BLOCK_211#	SPN23F16720	D-alanine--D-alanine ligase
1611491	T	0.06468	C	79.34	BLOCK_211#	SPN23F16720	D-alanine--D-alanine ligase
1611494	C	0.3582	T	4.97	BLOCK_211#	SPN23F16720	D-alanine--D-alanine ligase
1611518	G	0.1426	A	133.1	BLOCK_211#	SPN23F16720	D-alanine--D-alanine ligase
1611554	G	0.0796	A	158.7	BLOCK_211#	SPN23F16720	D-alanine--D-alanine ligase
1611557	A	0.0796	G	164.6	BLOCK_211#	SPN23F16720	D-alanine--D-alanine ligase
1611599	A	0.06633	G	82.5	BLOCK_211#	SPN23F16720	D-alanine--D-alanine ligase
1611602	C	0.1343	T	66.98	BLOCK_211#	SPN23F16720	D-alanine--D-alanine ligase
1611605	T	0.141	C	125.9	BLOCK_211#	SPN23F16720	D-alanine--D-alanine ligase
1611750	A	0.06136	G	158.3	BLOCK_211#	intergenic
1611798	G	0.3151	T	0.02431	BLOCK_211#	intergenic
1611815	T	0.1741	C	49.13	BLOCK_211#	intergenic
1611831	C	0.06468	T	485.6	BLOCK_211#	SPN23F16730	recombination protein RecR
1611834	T	0.1227	C	102.1	DISCRETE	SPN23F16730	recombination protein RecR
1611849	C	0.1028	T	47.79	BLOCK_212#	SPN23F16730	recombination protein RecR
1611879	G	0.1907	A	47.42	BLOCK_212#	SPN23F16730	recombination protein RecR
1611882	A	0.1907	G	47.42	BLOCK_212#	SPN23F16730	recombination protein RecR
1611885	T	0.1161	C	39.19	BLOCK_212#	SPN23F16730	recombination protein RecR
1611906	C	0.1294	T	88	BLOCK_213#	SPN23F16730	recombination protein RecR
1611909	C	0.1891	T	45.78	BLOCK_213#	SPN23F16730	recombination protein RecR
1611912	G	0.1227	A	52.05	BLOCK_214#	SPN23F16730	recombination protein RecR
1611933	T	0.2272	C	22.33	BLOCK_214#	SPN23F16730	recombination protein RecR
1611996	T	0.2156	C	109.1	BLOCK_214#	SPN23F16730	recombination protein RecR
1611999	G	0.1459	A	131.9	BLOCK_214#	SPN23F16730	recombination protein RecR
1612002	T	0.1376	C	46.83	BLOCK_214#	SPN23F16730	recombination protein RecR
1612038	G	0.2106	A	75.54	BLOCK_214#	SPN23F16730	recombination protein RecR
1612041	A	0.126	G	22.97	BLOCK_214#	SPN23F16730	recombination protein RecR
1612059	A	0.1725	G	108.1	BLOCK_215#	SPN23F16730	recombination protein RecR
1612154	G	0.2123	T	77.03	BLOCK_215#	SPN23F16730	recombination protein RecR
1612170	C	0.1625	T	100.9	DISCRETE	SPN23F16730	recombination protein RecR
1612176	C	0.2106	T	66.98	BLOCK_216#	SPN23F16730	recombination protein RecR
1612212	G	0.05804	A	43.01	BLOCK_216#	SPN23F16730	recombination protein RecR
1612251	G	0.1907	A	59.29	BLOCK_217#	SPN23F16730	recombination protein RecR
1612254	G	0.2189	T	131.7	BLOCK_217#	SPN23F16730	recombination protein RecR
1612305	G	0.199	A	57	BLOCK_217#	SPN23F16730	recombination protein RecR
1612309	T	0.2189	G	131.7	BLOCK_217#	SPN23F16730	recombination protein RecR
1612391	G	0.2023	A	115.6	BLOCK_217#	SPN23F16730	recombination protein RecR
1612468	A	0.2272	G	54.54	BLOCK_218#	SPN23F16740	penicillin-binding protein 2b
1612576	A	0.1244	G	30.47	BLOCK_218#	SPN23F16740	penicillin-binding protein 2b
1612624	C	0.1095	T	629	DISCRETE	SPN23F16740	penicillin-binding protein 2b
1612798	G	0.1227	T	524.5	BLOCK_219#	SPN23F16740	penicillin-binding protein 2b
1612860	C	0.3151	T	55.15	BLOCK_219#	SPN23F16740	penicillin-binding protein 2b
1612930	G	0.2355	A	NA	BLOCK_220#	SPN23F16740	penicillin-binding protein 2b
1612933	G	0.1891	A	NA	BLOCK_220#	SPN23F16740	penicillin-binding protein 2b
1612954	G	0.141	C	178.5	BLOCK_221#	SPN23F16740	penicillin-binding protein 2b
1613014	A	0.1078	G	110.4	BLOCK_221#	SPN23F16740	penicillin-binding protein 2b
1613032	C	0.199	T	50.07	DISCRETE	SPN23F16740	penicillin-binding protein 2b
1613034	C	0.1841	A	41.19	BLOCK_222#	SPN23F16740	penicillin-binding protein 2b
1613038	A	0.199	C	50.07	BLOCK_222#	SPN23F16740	penicillin-binding protein 2b
1613045	C	0.33	T	100.3	BLOCK_222#	SPN23F16740	penicillin-binding protein 2b
1613055	T	0.1841	A	41.19	BLOCK_222#	SPN23F16740	penicillin-binding protein 2b
1613056	T	0.2007	C	60.78	BLOCK_222#	SPN23F16740	penicillin-binding protein 2b
1613059	C	0.1973	T	41.19	BLOCK_222#	SPN23F16740	penicillin-binding protein 2b
1613061	A	0.2023	G	76.85	BLOCK_222#	SPN23F16740	penicillin-binding protein 2b
1613074	A	0.204	G	79.79	BLOCK_222#	SPN23F16740	penicillin-binding protein 2b
1613098	C	0.3317	T	119.2	BLOCK_222#	SPN23F16740	penicillin-binding protein 2b
1613107	G	0.1957	A	47.25	BLOCK_222#	SPN23F16740	penicillin-binding protein 2b
1613109	T	0.2106	G	63.13	BLOCK_222#	SPN23F16740	penicillin-binding protein 2b
1613125	A	0.2239	G	63.13	BLOCK_222#	SPN23F16740	penicillin-binding protein 2b
1613131	G	0.194	A	43	BLOCK_222#	SPN23F16740	penicillin-binding protein 2b
1613134	A	0.2289	G	46.28	BLOCK_222#	SPN23F16740	penicillin-binding protein 2b
1613154	A	0.2106	G	63.13	BLOCK_222#	SPN23F16740	penicillin-binding protein 2b
1613155	G	0.2106	A	63.13	BLOCK_222#	SPN23F16740	penicillin-binding protein 2b
1613160	C	0.2106	G	63.13	BLOCK_222#	SPN23F16740	penicillin-binding protein 2b
1613170	A	0.2687	G	112.4	BLOCK_222#	SPN23F16740	penicillin-binding protein 2b
1613176	A	0.1957	G	47.25	BLOCK_222#	SPN23F16740	penicillin-binding protein 2b
1613179	A	0.194	T	43	BLOCK_222#	SPN23F16740	penicillin-binding protein 2b
1613182	T	0.194	A	43	BLOCK_222#	SPN23F16740	penicillin-binding protein 2b
1613185	A	0.1957	G	44.64	BLOCK_222#	SPN23F16740	penicillin-binding protein 2b
1613192	A	0.194	T	43	BLOCK_222#	SPN23F16740	penicillin-binding protein 2b
1613193	A	0.194	G	43	BLOCK_222#	SPN23F16740	penicillin-binding protein 2b
1613194	T	0.194	A	43	BLOCK_222#	SPN23F16740	penicillin-binding protein 2b
1613195	T	0.194	G	43	BLOCK_222#	SPN23F16740	penicillin-binding protein 2b
1613208	A	0.194	T	43	BLOCK_222#	SPN23F16740	penicillin-binding protein 2b
1613209	A	0.2123	G	65.27	BLOCK_222#	SPN23F16740	penicillin-binding protein 2b
1613230	A	0.1791	G	23.88	BLOCK_222#	SPN23F16740	penicillin-binding protein 2b
1613238	G	0.2007	A	26.79	BLOCK_222#	SPN23F16740	penicillin-binding protein 2b
1613242	A	0.1874	G	30.02	BLOCK_222#	SPN23F16740	penicillin-binding protein 2b
1613248	T	0.1774	C	22.77	BLOCK_222#	SPN23F16740	penicillin-binding protein 2b
1613254	T	0.1857	C	28.83	BLOCK_222#	SPN23F16740	penicillin-binding protein 2b
1613257	A	0.08126	G	45.61	DISCRETE	SPN23F16740	penicillin-binding protein 2b
1613266	T	0.2338	C	20.96	BLOCK_223#	SPN23F16740	penicillin-binding protein 2b
1613269	A	0.1758	G	21.66	BLOCK_223#	SPN23F16740	penicillin-binding protein 2b
1613296	A	0.06965	G	111.2	BLOCK_223#	SPN23F16740	penicillin-binding protein 2b
1613308	A	0.1658	G	14.18	DISCRETE	SPN23F16740	penicillin-binding protein 2b
1613365	G	0.02156	C	NA	DISCRETE	SPN23F16740	penicillin-binding protein 2b
1613379	G	0.2189	A	24.94	BLOCK_224#	SPN23F16740	penicillin-binding protein 2b
1613392	T	0.1575	C	11.75	BLOCK_224#	SPN23F16740	penicillin-binding protein 2b
1613404	T	0.1045	C	630.9	BLOCK_225#	SPN23F16740	penicillin-binding protein 2b
1613458	T	0.02819	C	NA	DISCRETE	SPN23F16740	penicillin-binding protein 2b
1613461	A	0.0398	G	NA	DISCRETE	SPN23F16740	penicillin-binding protein 2b
1613478	A	0.06136	G	115.5	BLOCK_225#	SPN23F16740	penicillin-binding protein 2b
1613503	C	0.4212	T	6.298	BLOCK_225#	SPN23F16740	penicillin-binding protein 2b
1613506	G	0.06302	A	124.7	BLOCK_226#	SPN23F16740	penicillin-binding protein 2b
1613689	G	0.3964	A	15.13	BLOCK_226#	SPN23F16740	penicillin-binding protein 2b
1613770	T	0.1658	A	49.63	BLOCK_227#	SPN23F16740	penicillin-binding protein 2b
1613799	T	0.1144	C	342.5	BLOCK_227#	SPN23F16740	penicillin-binding protein 2b
1613805	G	0.1443	T	49.63	BLOCK_228#	SPN23F16740	penicillin-binding protein 2b
1613838	G	0.09453	T	0	BLOCK_228#	SPN23F16740	penicillin-binding protein 2b
1613986	C	0.4362	T	0.2307	BLOCK_228#	SPN23F16740	penicillin-binding protein 2b
1613990	G	0.1526	T	46.28	BLOCK_228#	SPN23F16740	penicillin-binding protein 2b
1614034	G	0.1526	A	46.28	BLOCK_228#	SPN23F16740	penicillin-binding protein 2b
1614064	G	0.4212	A	0.1702	BLOCK_228#	SPN23F16740	penicillin-binding protein 2b
1614148	C	0.141	A	41.24	BLOCK_228#	SPN23F16740	penicillin-binding protein 2b
1614185	A	0.1376	G	47.4	BLOCK_228#	SPN23F16740	penicillin-binding protein 2b
1614217	A	0.06799	G	125.7	BLOCK_228#	SPN23F16740	penicillin-binding protein 2b
1614283	G	0.1327	A	46.22	BLOCK_228#	SPN23F16740	penicillin-binding protein 2b
1614295	A	0.1227	G	39.59	BLOCK_228#	SPN23F16740	penicillin-binding protein 2b
1614298	A	0.136	T	47.4	BLOCK_228#	SPN23F16740	penicillin-binding protein 2b
1614305	G	0.136	C	47.4	BLOCK_228#	SPN23F16740	penicillin-binding protein 2b
1614310	G	0.136	A	47.4	BLOCK_228#	SPN23F16740	penicillin-binding protein 2b
1614312	C	0.136	T	47.4	BLOCK_228#	SPN23F16740	penicillin-binding protein 2b
1614406	C	0.0597	T	110.7	BLOCK_228#	SPN23F16740	penicillin-binding protein 2b
1614415	A	0.06468	G	110.7	BLOCK_228#	SPN23F16740	penicillin-binding protein 2b
1614526	A	0.06302	G	110.4	BLOCK_228#	intergenic
1614529	C	0.1227	T	40.59	BLOCK_229#	intergenic
1614570	C	0.05141	A	14.64	BLOCK_229#	intergenic
1614572	G	0.05141	A	14.64	BLOCK_229#	intergenic
1614573	T	0.04809	C	13.39	BLOCK_229#	intergenic
1614579	A	0.05141	G	14.64	BLOCK_229#	intergenic
1614594	C	0.06136	T	12.74	BLOCK_229#	intergenic
1614599	C	0.06468	T	14.64	BLOCK_229#	intergenic
1614608	A	0.06302	G	13.33	BLOCK_229#	intergenic
1614663	T	0.06302	G	13.33	BLOCK_229#	intergenic
1614673	C	0.06468	T	14.64	BLOCK_229#	intergenic
1615037	T	0.04643	C	14.64	BLOCK_229#	SPN23F16750	putative transcription regulator
1615090	T	0.05638	C	NA	BLOCK_230#	SPN23F16750	putative transcription regulator
1615096	T	0.04312	C	NA	BLOCK_230#	SPN23F16750	putative transcription regulator
1615117	C	0.0597	T	NA	BLOCK_230#	SPN23F16750	putative transcription regulator
1615123	T	0.0597	A	NA	BLOCK_230#	SPN23F16750	putative transcription regulator
1615126	G	0.05473	A	NA	BLOCK_230#	SPN23F16750	putative transcription regulator
1615150	C	0.04478	A	NA	DISCRETE	SPN23F16750	putative transcription regulator
1615153	T	0.04478	C	NA	DISCRETE	SPN23F16750	putative transcription regulator
1615183	T	0.06468	C	NA	BLOCK_231#	SPN23F16750	putative transcription regulator
1615189	C	0.03648	T	NA	DISCRETE	SPN23F16750	putative transcription regulator
1615201	C	0.06799	A	NA	BLOCK_231#	SPN23F16750	putative transcription regulator
1615319	G	0.04809	A	NA	BLOCK_231#	SPN23F16750	putative transcription regulator
1615333	C	0.02819	T	NA	DISCRETE	SPN23F16750	putative transcription regulator
1615345	T	0.02985	C	NA	DISCRETE	SPN23F16750	putative transcription regulator
1615357	G	0.06633	A	NA	BLOCK_231#	SPN23F16750	putative transcription regulator
1615360	T	0.06799	C	NA	BLOCK_231#	SPN23F16750	putative transcription regulator
1615486	G	0.02985	A	NA	DISCRETE	SPN23F16750	putative transcription regulator
1615519	C	0.06136	A	NA	BLOCK_231#	SPN23F16750	putative transcription regulator
1615634	A	0.06633	T	NA	BLOCK_231#	SPN23F16760	ROK family protein
1615637	C	0.05473	T	NA	BLOCK_231#	SPN23F16760	ROK family protein
1615676	T	0.05307	C	NA	BLOCK_231#	SPN23F16760	ROK family protein
1615688	A	0.06302	G	NA	BLOCK_231#	SPN23F16760	ROK family protein
1615691	C	0.05307	A	NA	BLOCK_231#	SPN23F16760	ROK family protein
1615781	T	0.06633	A	NA	BLOCK_231#	SPN23F16760	ROK family protein
1615814	A	0.06302	G	NA	BLOCK_231#	SPN23F16760	ROK family protein
1615817	G	0.06302	T	NA	BLOCK_231#	SPN23F16760	ROK family protein
1619970	G	0.4876	A	8.12	BLOCK_231#	SPN23F16810	putative transport system permease
1639785	C	0.06468	T	380.8	DISCRETE	SPN23F16960	ATP-dependent DNA helicase
1645174	A	0.04975	C	15.74	DISCRETE	SPN23F17010	putative preprotein SecA subunit
1673942	T	0.02322	G	23.22	DISCRETE	SPN23F17340	putative membrane protein
1673943	G	0.02819	A	17.27	DISCRETE	SPN23F17340	putative membrane protein
1737361	A	0.2322	C	15.83	BLOCK_232#	SPN23F17880	conserved hypothetical protein
1737378	A	0.4444	G	7.75	BLOCK_232#	SPN23F17880	conserved hypothetical protein
1738407	G	0.3947	C	5.75	DISCRETE	SPN23F17900	aquaporin Z
1738776	A	0.4693	G	7.97	BLOCK_233#	SPN23F17900	aquaporin Z
1739408	A	0.398	G	17.33	BLOCK_233#	SPN23F17910	conserved hypothetical protein
1739410	T	0.3748	A	0.1167	BLOCK_234#	SPN23F17910	conserved hypothetical protein
1739425	A	0.3947	G	38	BLOCK_234#	SPN23F17910	conserved hypothetical protein
1739652	G	0.4478	A	29.14	BLOCK_234#	SPN23F17910	conserved hypothetical protein
1740486	A	0.2836	G	20.68	BLOCK_235#	SPN23F17930	putative oligopeptidase
1741671	G	0.4561	A	10.91	BLOCK_235#	SPN23F17930	putative oligopeptidase
1741683	C	0.4942	T	0.06358	BLOCK_235#	SPN23F17930	putative oligopeptidase
1777314	T	0.05473	G	12.46	DISCRETE	intergenic
1789313	G	0.2056	A	6.746	DISCRETE	SPN23F18430	putative iron ABC transporter, ATP-binding protein
1848534	T	0.06468	C	NA	DISCRETE	SPN23F19060	putative oligopeptide transporter ATP-binding protein
1850715	A	0.1592	C	0.1751	DISCRETE	SPN23F19080	putative oligopeptide transporter permease protein
1851253	G	0.09784	A	0	BLOCK_236#	SPN23F19080	putative oligopeptide transporter permease protein
1852294	C	0.3466	T	0.241	BLOCK_236#	SPN23F19100	putative extracellular oligopeptide-binding protein
1853974	A	0.2206	G	0.153	BLOCK_237#	intergenic
1853981	T	0.2206	C	0.153	BLOCK_237#	intergenic
1853989	C	0.2272	T	0.1974	BLOCK_237#	intergenic
1854146	C	0.2703	T	0.1895	BLOCK_238#	intergenic
1854157	C	0.2653	T	0.1886	BLOCK_238#	intergenic
1854205	G	0.2554	A	0.1666	BLOCK_238#	intergenic
1855693	T	0.07131	A	32.46	BLOCK_239#	intergenic
1855815	T	0.3715	A	7.528	BLOCK_239#	SPN23F19120	sucrose phosphorylase
1855954	C	0.07131	T	32.46	BLOCK_239#	SPN23F19120	sucrose phosphorylase
1857023	T	0.2604	C	0.2155	DISCRETE	SPN23F19120	sucrose phosphorylase
1873081	C	0.1177	T	5.426	BLOCK_240#	SPN23F19230	putative RNA methyltransferase
1873082	T	0.1177	A	5.426	BLOCK_240#	SPN23F19230	putative RNA methyltransferase
1873458	A	0.1426	T	0.2119	DISCRETE	SPN23F19230	putative RNA methyltransferase
1874658	T	0.3566	C	0.2084	DISCRETE	SPN23F19240	RecX family protein
1875706	A	0.2355	G	0.2456	DISCRETE	SPN23F19250	conserved hypothetical protein
1875957	T	0.3582	C	6.1	BLOCK_241#	intergenic
1876002	A	0.3035	G	4.346	BLOCK_241#	intergenic
1876037	A	0.4942	G	0.1755	BLOCK_241#	intergenic
1876062	T	0.4876	A	7.348	BLOCK_241#	intergenic
1876347	A	0.06633	G	NA	BLOCK_241#	intergenic
1876498	A	0.09784	C	24.34	BLOCK_242#	intergenic
1876499	T	0.09287	C	97.37	BLOCK_242#	intergenic
1878619	T	0.1708	G	0.1765	BLOCK_242#	SPN23F19300	60 kDa chaperonin
1957884	T	0.1857	C	9.238	DISCRETE	SPN23F20180	haloacid dehalogenase-like hydrolase
1987551	G	0.3217	A	6.663	BLOCK_243#	intergenic
1987560	T	0.3184	C	7.393	BLOCK_243#	intergenic
2018189	C	0.3682	T	10.43	DISCRETE	SPN23F20810	queuine tRNA-ribosyltransferase
2018579	A	0.3085	G	11.45	DISCRETE	SPN23F20820	putative membrane protein
2036291	A	0.2819	G	15.14	BLOCK_244#	SPN23F20950	glucose-6-phosphate isomerase
2050705	T	0.06633	C	NA	BLOCK_244#	SPN23F21080	putative alkaline phosphatase synthesis sensor protein
2072108	A	0.06468	G	NA	DISCRETE	intergenic
2152397	T	0.1144	C	0.03406	BLOCK_245#	SPN23F22060	putative D-alanyl-lipoteichoic acid biosynthesis protein
2152868	C	0.1426	T	0.1721	BLOCK_245#	SPN23F22060	putative D-alanyl-lipoteichoic acid biosynthesis protein
2153986	G	0.2587	A	0.2899	DISCRETE	SPN23F22080	putative activated D-alanine transport protein
2154588	C	0.2305	T	0.2616	BLOCK_246#	SPN23F22080	putative activated D-alanine transport protein
2154592	T	0.2289	C	0.2386	BLOCK_246#	SPN23F22080	putative activated D-alanine transport protein
2154744	T	0.06633	G	NA	BLOCK_247#	SPN23F22080	putative activated D-alanine transport protein
2155092	A	0.4594	G	0.2552	BLOCK_247#	SPN23F22090	D-alanine--poly(phosphoribitol) ligase subunit 1
2155470	A	0.06633	C	NA	BLOCK_247#	SPN23F22090	D-alanine--poly(phosphoribitol) ligase subunit 1
2155602	A	0.1575	C	6.534	BLOCK_247#	SPN23F22090	D-alanine--poly(phosphoribitol) ligase subunit 1
2156185	A	0.08789	G	0.002398	BLOCK_248#	SPN23F22090	D-alanine--poly(phosphoribitol) ligase subunit 1
2156828	A	0.1459	C	0.1329	BLOCK_248#	intergenic
2156920	A	0.3134	C	0.1374	BLOCK_249#	intergenic
2159046	A	0.07463	G	7.764	BLOCK_249#	SPN23F22120	putative reverse transcriptase - Group II intron (pseudogene)
2159101	G	0.08789	A	7.764	BLOCK_249#	SPN23F22120	putative reverse transcriptase - Group II intron (pseudogene)
2159163	G	0.07629	A	7.26	BLOCK_249#	SPN23F22120	putative reverse transcriptase - Group II intron (pseudogene)
2159248	G	0.07463	A	7.764	BLOCK_249#	SPN23F22120	putative reverse transcriptase - Group II intron (pseudogene)
2159260	A	0.07463	C	7.764	BLOCK_249#	SPN23F22120	putative reverse transcriptase - Group II intron (pseudogene)
2159272	C	0.07463	T	7.764	BLOCK_249#	SPN23F22120	putative reverse transcriptase - Group II intron (pseudogene)
2159275	T	0.07463	C	7.764	BLOCK_249#	SPN23F22120	putative reverse transcriptase - Group II intron (pseudogene)
2159380	G	0.07629	A	7.26	BLOCK_249#	SPN23F22120	putative reverse transcriptase - Group II intron (pseudogene)
2159407	T	0.07629	C	7.26	BLOCK_249#	SPN23F22120	putative reverse transcriptase - Group II intron (pseudogene)
2159595	G	0.07463	A	7.764	BLOCK_249#	SPN23F22120	putative reverse transcriptase - Group II intron (pseudogene)
2159625	A	0.07463	G	7.764	BLOCK_249#	SPN23F22120	putative reverse transcriptase - Group II intron (pseudogene)
2159640	A	0.07463	G	7.764	BLOCK_249#	SPN23F22120	putative reverse transcriptase - Group II intron (pseudogene)
2159691	G	0.06633	A	8.914	BLOCK_249#	SPN23F22120	putative reverse transcriptase - Group II intron (pseudogene)
2159705	T	0.1476	C	11.72	BLOCK_249#	SPN23F22120	putative reverse transcriptase - Group II intron (pseudogene)
2159712	G	0.06633	A	8.914	BLOCK_249#	SPN23F22120	putative reverse transcriptase - Group II intron (pseudogene)
2159725	C	0.3648	T	3.582	BLOCK_249#	SPN23F22120	putative reverse transcriptase - Group II intron (pseudogene)
2159777	G	0.07131	A	8.004	BLOCK_249#	SPN23F22120	putative reverse transcriptase - Group II intron (pseudogene)
2159799	G	0.06799	A	7.999	BLOCK_249#	SPN23F22120	putative reverse transcriptase - Group II intron (pseudogene)
2159800	C	0.06799	T	7.999	BLOCK_249#	SPN23F22120	putative reverse transcriptase - Group II intron (pseudogene)
2159801	C	0.06799	T	7.999	BLOCK_249#	SPN23F22120	putative reverse transcriptase - Group II intron (pseudogene)
2159820	A	0.06633	C	8.914	BLOCK_249#	SPN23F22120	putative reverse transcriptase - Group II intron (pseudogene)
2159850	A	0.06633	G	8.914	BLOCK_249#	SPN23F22120	putative reverse transcriptase - Group II intron (pseudogene)
2159874	A	0.08126	C	7.999	BLOCK_249#	SPN23F22120	putative reverse transcriptase - Group II intron (pseudogene)
2159883	G	0.06799	T	7.999	BLOCK_249#	SPN23F22120	putative reverse transcriptase - Group II intron (pseudogene)
2160016	T	0.08458	C	10.08	BLOCK_249#	intergenic
2160921	A	0.1194	G	5.694	BLOCK_249#	intergenic
2162025	A	0.02322	G	NA	DISCRETE	intergenic
2162237	A	0.2338	T	5.711	BLOCK_250#	SPN23F22180	glycerol uptake facilitator protein 1
2162249	T	0.2471	G	5.73	BLOCK_250#	SPN23F22180	glycerol uptake facilitator protein 1
2162252	C	0.2471	T	5.73	BLOCK_250#	SPN23F22180	glycerol uptake facilitator protein 1
2162270	A	0.257	G	5.893	BLOCK_250#	SPN23F22180	glycerol uptake facilitator protein 1
2162299	A	0.257	G	5.893	BLOCK_250#	SPN23F22180	glycerol uptake facilitator protein 1
2162306	A	0.257	C	5.893	BLOCK_250#	SPN23F22180	glycerol uptake facilitator protein 1
2162308	G	0.257	A	5.893	BLOCK_250#	SPN23F22180	glycerol uptake facilitator protein 1
2162312	A	0.2554	G	5.524	BLOCK_250#	SPN23F22180	glycerol uptake facilitator protein 1
2162342	C	0.2521	A	6.038	BLOCK_250#	SPN23F22180	glycerol uptake facilitator protein 1
2162345	A	0.2521	T	6.038	BLOCK_250#	SPN23F22180	glycerol uptake facilitator protein 1
2162348	A	0.2521	G	6.038	BLOCK_250#	SPN23F22180	glycerol uptake facilitator protein 1
2162378	C	0.2521	T	6.038	BLOCK_250#	SPN23F22180	glycerol uptake facilitator protein 1
2162402	G	0.2521	A	6.038	BLOCK_250#	SPN23F22180	glycerol uptake facilitator protein 1
2162405	A	0.2504	T	5.664	BLOCK_250#	SPN23F22180	glycerol uptake facilitator protein 1
2164504	A	0.257	G	7.22	DISCRETE	SPN23F22190	alpha-glycerophosphate oxidase
2164748	A	0.2355	G	7.778	DISCRETE	SPN23F22190	alpha-glycerophosphate oxidase
2166494	A	0.1542	G	8.813	DISCRETE	intergenic
2168365	T	0.4892	C	3.965	BLOCK_251#	SPN23F22220	33 kDa chaperonin (heat shock protein 33 homolog)
2168449	T	0.02322	C	NA	DISCRETE	SPN23F22220	33 kDa chaperonin (heat shock protein 33 homolog)
2169149	T	0.09784	C	7.765	BLOCK_251#	SPN23F22230	putative tRNA-dihydrouridine synthase
2169440	G	0.02322	A	NA	DISCRETE	SPN23F22230	putative tRNA-dihydrouridine synthase
2170130	A	0.1857	G	0.06388	BLOCK_252#	intergenic
2170168	A	0.2289	G	5.552	BLOCK_252#	intergenic
2170327	G	0.1376	A	0.0487	BLOCK_252#	SPN23F22240	choline-binding surface protein A
2170948	C	0.02322	T	NA	DISCRETE	SPN23F22240	choline-binding surface protein A
2171058	T	0.1061	G	33.73	DISCRETE	SPN23F22240	choline-binding surface protein A
2171716	G	0.1211	C	5.727	DISCRETE	SPN23F22240	choline-binding surface protein A
2172417	T	0.0796	C	19.73	DISCRETE	SPN23F22240	choline-binding surface protein A
2172447	C	0.2073	T	5.428	DISCRETE	SPN23F22240	choline-binding surface protein A
2172519	C	0.1028	T	134.4	BLOCK_253#	SPN23F22240	choline-binding surface protein A
2172531	G	0.1045	T	28.26	BLOCK_253#	SPN23F22240	choline-binding surface protein A
2172796	A	0.33	G	0.09518	BLOCK_253#	intergenic
2172797	A	0.2886	T	0.1028	BLOCK_253#	intergenic
2172987	C	0.4561	T	0.1448	BLOCK_253#	SPN23F22250	isoprenylcysteine carboxyl methyltransferase (ICMT) family protein
2172991	A	0.4561	G	0.1448	BLOCK_253#	SPN23F22250	isoprenylcysteine carboxyl methyltransferase (ICMT) family protein
2173027	A	0.4245	T	0.178	BLOCK_254#	SPN23F22250	isoprenylcysteine carboxyl methyltransferase (ICMT) family protein
2173029	G	0.4245	A	0.178	BLOCK_254#	SPN23F22250	isoprenylcysteine carboxyl methyltransferase (ICMT) family protein
2173210	C	0.3864	A	4.229	DISCRETE	SPN23F22250	isoprenylcysteine carboxyl methyltransferase (ICMT) family protein
2173219	A	0.2637	G	4.918	BLOCK_255#	SPN23F22250	isoprenylcysteine carboxyl methyltransferase (ICMT) family protein
2173231	T	0.4046	C	4.326	BLOCK_255#	SPN23F22250	isoprenylcysteine carboxyl methyltransferase (ICMT) family protein
2173239	G	0.4046	A	4.326	BLOCK_255#	SPN23F22250	isoprenylcysteine carboxyl methyltransferase (ICMT) family protein
2173269	A	0.4212	T	4.121	BLOCK_255#	SPN23F22250	isoprenylcysteine carboxyl methyltransferase (ICMT) family protein
2173270	C	0.4212	A	4.121	BLOCK_255#	SPN23F22250	isoprenylcysteine carboxyl methyltransferase (ICMT) family protein
2173970	T	0.2172	C	6.287	DISCRETE	SPN23F22260	putative two-component system, sensor histidine kinase
2175330	A	0.1078	G	0.08711	DISCRETE	SPN23F22270	putative two-component system, response regulator
2176090	G	0.07629	A	NA	BLOCK_256#	SPN23F22280	putative stress response-related Clp ATPase
2176242	A	0.3433	G	3.671	BLOCK_256#	SPN23F22280	putative stress response-related Clp ATPase
2176353	G	0.4444	A	3.187	DISCRETE	SPN23F22280	putative stress response-related Clp ATPase
2176415	G	0.1459	A	3.583	BLOCK_257#	SPN23F22280	putative stress response-related Clp ATPase
2176650	G	0.4942	C	6.156	BLOCK_257#	SPN23F22280	putative stress response-related Clp ATPase
2176928	A	0.3449	G	0.1728	DISCRETE	SPN23F22280	putative stress response-related Clp ATPase
2191808	T	0.1194	C	15.74	DISCRETE	SPN23F22430	putative cysteine synthase
2194034	T	0.05307	C	57	DISCRETE	SPN23F22470	elongation factor Ts
2198315	T	0.2371	C	0.2352	DISCRETE	intergenic
2198437	C	0.1857	T	0.125	DISCRETE	SPN23F22520	putative cobalt transport protein
2200566	T	0.1194	G	6.27	DISCRETE	SPN23F22540	ABC transporter ATP-binding protein
2201105	C	0.126	T	18.8	DISCRETE	SPN23F22550	putative CDP-diacylglycerol--glycerol-3-phosphate 3-phosphatidyltransferase
2201867	A	0.09121	G	0.03999	DISCRETE	SPN23F22560	putative membrane protein
2203639	T	0.09287	C	6.086	DISCRETE	SPN23F22580	putative protease
2204249	G	0.09784	A	6.684	BLOCK_258#	SPN23F22580	putative protease
2205048	C	0.1161	T	0.2006	BLOCK_258#	SPN23F22590	conserved hypothetical protein
2205557	T	0.126	C	0.2308	BLOCK_258#	SPN23F22600	DNA replication and repair protein RecF
2206196	T	0.4892	G	0.2611	BLOCK_258#	SPN23F22600	DNA replication and repair protein RecF
2206361	G	0.09619	A	7.02	BLOCK_259#	SPN23F22600	DNA replication and repair protein RecF
2207268	T	0.09784	C	0	BLOCK_259#	SPN23F22610	inosine-5'-monophosphate dehydrogenase
2209293	C	0.3167	T	0.2874	BLOCK_259#	intergenic
2210098	T	0.2554	C	0.18	BLOCK_260#	SPN23F22630	ABC transporter, ATP-binding protein
2210188	G	0.3516	A	0.1691	BLOCK_260#	SPN23F22630	ABC transporter, ATP-binding protein
2210267	T	0.1144	C	0.204	BLOCK_260#	SPN23F22630	ABC transporter, ATP-binding protein
2210677	G	0.06633	A	NA	DISCRETE	SPN23F22630	ABC transporter, ATP-binding protein
