# Supplementary material for: Comprehensive Identification of Single Nucleotide Polymorphisms Associated with Beta-lactam Resistance within Pneumococcal Mosaic Genes
Source: PLoS Genet. 2014 Aug 7;10(8):e1004547. doi: 10.1371/journal.pgen.1004547 (PMC4125147; doi:10.1371/journal.pgen.1004547)
Supplement: Table S4 — Additional strain information for beta-lactam susceptible and non-susceptible phenotypes for the Maela dataset. Susceptibilities were determined by disk diffusion with oxacillin (1 µg oxacillin disk zone diameter of <20 mm). Minimum inhibitory concentration (MIC) values were determined by E-test if disk diffusion test indicated potential penicillin non-susceptibility [20]. (XLS) [file pgen.1004547.s008.xls]

## Sheet: revision_sup.table4.txt
isolate_id	ENA_accession_no	Binary_phenotype_determined_by_penicillin_MIC	penicillin_MIC(µg/mL)	ceftriaxone_MIC(µg/mL)
SMRU1	ERR039560	SUSCEPTIBLE	<0.06	<0.5
SMRU2	ERR039561	NON-SUSCEPTIBLE	1	0.5
SMRU3	ERR039562	NON-SUSCEPTIBLE	2	0.5
SMRU4	ERR039563	SUSCEPTIBLE	<0.06	<0.5
SMRU5	ERR039564	SUSCEPTIBLE	<0.06	<0.5
SMRU6	ERR039565	SUSCEPTIBLE	<0.06	<0.5
SMRU7	ERR039566	SUSCEPTIBLE	<0.06	<0.5
SMRU8	ERR039567	SUSCEPTIBLE	<0.06	<0.5
SMRU9	ERR039568	NON-SUSCEPTIBLE	0.25	0.5
SMRU10	ERR039569	SUSCEPTIBLE	<0.06	<0.5
SMRU12	ERR039571	SUSCEPTIBLE	<0.06	<0.5
SMRU13	ERR039572	NON-SUSCEPTIBLE	0.125	0.125
SMRU14	ERR039573	SUSCEPTIBLE	<0.06	<0.5
SMRU15	ERR039574	SUSCEPTIBLE	<0.06	<0.5
SMRU16	ERR039575	NON-SUSCEPTIBLE	0.5	0.5
SMRU17	ERR039576	SUSCEPTIBLE	<0.06	<0.5
SMRU18	ERR039577	SUSCEPTIBLE	<0.06	<0.5
SMRU19	ERR039578	SUSCEPTIBLE	<0.06	<0.5
SMRU20	ERR039579	NON-SUSCEPTIBLE	0.5	0.5
SMRU21	ERR039580	SUSCEPTIBLE	<0.06	<0.5
SMRU22	ERR039581	NON-SUSCEPTIBLE	0.5	0.25
SMRU23	ERR039582	NON-SUSCEPTIBLE	0.064	0.064
SMRU24	ERR039583	NON-SUSCEPTIBLE	2	1
SMRU25	ERR039584	NON-SUSCEPTIBLE	0.25	0.125
SMRU26	ERR039585	NON-SUSCEPTIBLE	0.125	0.125
SMRU27	ERR039586	SUSCEPTIBLE	<0.06	<0.5
SMRU28	ERR039587	SUSCEPTIBLE	<0.06	<0.5
SMRU29	ERR039588	SUSCEPTIBLE	<0.06	<0.5
SMRU30	ERR039589	NON-SUSCEPTIBLE	0.125	0.125
SMRU31	ERR039590	SUSCEPTIBLE	<0.06	<0.5
SMRU32	ERR039591	SUSCEPTIBLE	<0.06	<0.5
SMRU33	ERR039592	NON-SUSCEPTIBLE	0.25	0.25
SMRU34	ERR039593	NON-SUSCEPTIBLE	0.064	0.064
SMRU35	ERR039594	NON-SUSCEPTIBLE	0.064	0.25
SMRU36	ERR039595	NON-SUSCEPTIBLE	0.25	0.25
SMRU37	ERR039596	SUSCEPTIBLE	<0.06	<0.5
SMRU38	ERR039597	SUSCEPTIBLE	<0.06	<0.5
SMRU39	ERR039598	SUSCEPTIBLE	<0.06	<0.5
SMRU40	ERR039599	NON-SUSCEPTIBLE	1	1
SMRU41	ERR039600	SUSCEPTIBLE	<0.06	<0.5
SMRU42	ERR039601	NON-SUSCEPTIBLE	0.5	0.5
SMRU43	ERR039602	SUSCEPTIBLE	<0.06	<0.5
SMRU44	ERR039603	NON-SUSCEPTIBLE	0.5	0.125
SMRU45	ERR039604	SUSCEPTIBLE	<0.06	<0.5
SMRU46	ERR039605	SUSCEPTIBLE	<0.06	<0.5
SMRU47	ERR039606	SUSCEPTIBLE	<0.06	<0.5
SMRU48	ERR039607	SUSCEPTIBLE	<0.06	<0.5
SMRU49	ERR039608	NON-SUSCEPTIBLE	0.5	0.5
SMRU50	ERR039609	SUSCEPTIBLE	<0.06	<0.5
SMRU51	ERR039610	SUSCEPTIBLE	<0.06	<0.5
SMRU52	ERR039611	SUSCEPTIBLE	<0.06	<0.5
SMRU53	ERR039612	SUSCEPTIBLE	<0.06	<0.5
SMRU54	ERR039613	NON-SUSCEPTIBLE	0.064	0.064
SMRU55	ERR039614	NON-SUSCEPTIBLE	0.125	0.25
SMRU56	ERR039615	NON-SUSCEPTIBLE	0.125	0.125
SMRU57	ERR039616	SUSCEPTIBLE	<0.06	<0.5
SMRU58	ERR039617	SUSCEPTIBLE	<0.06	<0.5
SMRU59	ERR039618	NON-SUSCEPTIBLE	1	0.5
SMRU60	ERR039619	SUSCEPTIBLE	<0.06	<0.5
SMRU61	ERR039620	SUSCEPTIBLE	<0.06	<0.5
SMRU62	ERR039621	NON-SUSCEPTIBLE	0.064	0.064
SMRU63	ERR039622	SUSCEPTIBLE	<0.06	<0.5
SMRU64	ERR039623	NON-SUSCEPTIBLE	0.064	0.25
SMRU65	ERR039624	NON-SUSCEPTIBLE	0.25	0.25
SMRU66	ERR039625	NON-SUSCEPTIBLE	0.5	0.5
SMRU67	ERR039626	SUSCEPTIBLE	<0.06	<0.5
SMRU68	ERR039627	SUSCEPTIBLE	<0.06	<0.5
SMRU69	ERR039628	SUSCEPTIBLE	<0.06	<0.5
SMRU70	ERR039629	SUSCEPTIBLE	<0.06	<0.5
SMRU71	ERR039630	NON-SUSCEPTIBLE	0.125	0.125
SMRU72	ERR039631	NON-SUSCEPTIBLE	0.5	0.5
SMRU73	ERR039632	SUSCEPTIBLE	<0.06	<0.5
SMRU74	ERR039633	NON-SUSCEPTIBLE	1	1
SMRU75	ERR039634	SUSCEPTIBLE	<0.06	<0.5
SMRU76	ERR039635	NON-SUSCEPTIBLE	0.125	0.125
SMRU77	ERR039636	NON-SUSCEPTIBLE	0.25	0.125
SMRU78	ERR039637	SUSCEPTIBLE	<0.06	<0.5
SMRU79	ERR039638	NON-SUSCEPTIBLE	0.25	0.125
SMRU80	ERR039639	SUSCEPTIBLE	<0.06	<0.5
SMRU81	ERR039640	NON-SUSCEPTIBLE	0.125	0.25
SMRU82	ERR039641	SUSCEPTIBLE	<0.06	<0.5
SMRU83	ERR039642	SUSCEPTIBLE	<0.06	<0.5
SMRU84	ERR039643	SUSCEPTIBLE	<0.06	<0.5
SMRU85	ERR039644	NON-SUSCEPTIBLE	1	0.5
SMRU86	ERR039645	SUSCEPTIBLE	<0.06	<0.5
SMRU87	ERR039646	SUSCEPTIBLE	<0.06	<0.5
SMRU88	ERR039647	NON-SUSCEPTIBLE	0.5	0.5
SMRU89	ERR039648	SUSCEPTIBLE	<0.06	<0.5
SMRU90	ERR039649	SUSCEPTIBLE	<0.06	<0.5
SMRU91	ERR039650	SUSCEPTIBLE	<0.06	<0.5
SMRU92	ERR039651	NON-SUSCEPTIBLE	0.5	0.5
SMRU93	ERR039652	NON-SUSCEPTIBLE	0.064	0.125
SMRU94	ERR039653	NON-SUSCEPTIBLE	0.125	0.064
SMRU95	ERR039654	NON-SUSCEPTIBLE	0.064	0.125
SMRU96	ERR039655	SUSCEPTIBLE	<0.06	<0.5
SMRU97	ERR047894	SUSCEPTIBLE	0.032	0.016
SMRU98	ERR047895	SUSCEPTIBLE	<0.06	<0.5
SMRU99	ERR047896	NON-SUSCEPTIBLE	0.5	0.5
SMRU100	ERR047897	NON-SUSCEPTIBLE	1	0.5
SMRU101	ERR047898	SUSCEPTIBLE	<0.06	<0.5
SMRU102	ERR047899	SUSCEPTIBLE	<0.06	<0.5
SMRU103	ERR047900	NON-SUSCEPTIBLE	0.5	0.25
SMRU104	ERR047901	SUSCEPTIBLE	<0.06	<0.5
SMRU105	ERR047902	NON-SUSCEPTIBLE	0.5	0.125
SMRU106	ERR047903	SUSCEPTIBLE	<0.06	<0.5
SMRU107	ERR047904	SUSCEPTIBLE	<0.06	<0.5
SMRU108	ERR047905	NON-SUSCEPTIBLE	0.25	0.25
SMRU109	ERR047906	SUSCEPTIBLE	<0.06	<0.5
SMRU110	ERR047907	SUSCEPTIBLE	<0.06	<0.5
SMRU111	ERR047908	SUSCEPTIBLE	<0.06	<0.5
SMRU112	ERR047909	SUSCEPTIBLE	<0.06	<0.5
SMRU113	ERR047910	SUSCEPTIBLE	<0.06	<0.5
SMRU114	ERR047911	NON-SUSCEPTIBLE	0.25	0.25
SMRU115	ERR047912	SUSCEPTIBLE	<0.06	<0.5
SMRU116	ERR047913	NON-SUSCEPTIBLE	0.064	0.064
SMRU117	ERR047914	SUSCEPTIBLE	<0.06	<0.5
SMRU118	ERR047915	SUSCEPTIBLE	0.032	0.032
SMRU119	ERR047916	SUSCEPTIBLE	<0.06	<0.5
SMRU120	ERR047917	SUSCEPTIBLE	<0.06	<0.5
SMRU121	ERR047918	NON-SUSCEPTIBLE	0.5	0.5
SMRU122	ERR047919	NON-SUSCEPTIBLE	1	0.5
SMRU123	ERR047920	SUSCEPTIBLE	<0.06	<0.5
SMRU124	ERR047921	NON-SUSCEPTIBLE	1	0.5
SMRU125	ERR047922	NON-SUSCEPTIBLE	0.5	0.25
SMRU126	ERR047923	NON-SUSCEPTIBLE	2	1
SMRU127	ERR047924	SUSCEPTIBLE	<0.06	<0.5
SMRU128	ERR047925	SUSCEPTIBLE	<0.06	<0.5
SMRU129	ERR047926	SUSCEPTIBLE	<0.06	<0.5
SMRU130	ERR047927	SUSCEPTIBLE	<0.06	<0.5
SMRU131	ERR047928	NON-SUSCEPTIBLE	2	1
SMRU132	ERR047929	SUSCEPTIBLE	<0.06	<0.5
SMRU133	ERR047930	SUSCEPTIBLE	<0.06	<0.5
SMRU134	ERR047931	NON-SUSCEPTIBLE	0.125	0.064
SMRU135	ERR047932	NON-SUSCEPTIBLE	0.5	0.25
SMRU136	ERR047933	NON-SUSCEPTIBLE	1	0.5
SMRU137	ERR047934	NON-SUSCEPTIBLE	0.064	0.064
SMRU138	ERR047935	NON-SUSCEPTIBLE	0.5	0.25
SMRU139	ERR047936	SUSCEPTIBLE	<0.06	<0.5
SMRU140	ERR047937	SUSCEPTIBLE	<0.06	<0.5
SMRU141	ERR047938	SUSCEPTIBLE	<0.06	<0.5
SMRU142	ERR047939	SUSCEPTIBLE	<0.06	<0.5
SMRU143	ERR047940	NON-SUSCEPTIBLE	0.125	0.25
SMRU144	ERR047941	SUSCEPTIBLE	<0.06	<0.5
SMRU145	ERR049079	SUSCEPTIBLE	<0.06	<0.5
SMRU146	ERR049080	SUSCEPTIBLE	<0.06	<0.5
SMRU147	ERR049081	NON-SUSCEPTIBLE	0.125	0.125
SMRU148	ERR049082	NON-SUSCEPTIBLE	0.125	0.125
SMRU149	ERR049083	SUSCEPTIBLE	<0.06	<0.5
SMRU150	ERR049084	NON-SUSCEPTIBLE	1	0.25
SMRU151	ERR049085	NON-SUSCEPTIBLE	0.125	0.125
SMRU152	ERR049086	SUSCEPTIBLE	<0.06	<0.5
SMRU153	ERR049087	NON-SUSCEPTIBLE	0.125	0.125
SMRU154	ERR049088	SUSCEPTIBLE	<0.06	<0.5
SMRU155	ERR049089	SUSCEPTIBLE	<0.06	<0.5
SMRU156	ERR049090	SUSCEPTIBLE	<0.06	<0.5
SMRU157	ERR049091	NON-SUSCEPTIBLE	0.125	0.125
SMRU158	ERR049092	SUSCEPTIBLE	<0.06	<0.5
SMRU159	ERR049093	NON-SUSCEPTIBLE	0.125	0.125
SMRU160	ERR049094	NON-SUSCEPTIBLE	0.064	0.032
SMRU161	ERR049095	NON-SUSCEPTIBLE	0.125	0.25
SMRU162	ERR049096	SUSCEPTIBLE	<0.06	<0.5
SMRU163	ERR049097	NON-SUSCEPTIBLE	1	0.5
SMRU164	ERR049098	SUSCEPTIBLE	<0.06	<0.5
SMRU165	ERR049099	NON-SUSCEPTIBLE	0.064	0.25
SMRU166	ERR049100	SUSCEPTIBLE	0.032	0.032
SMRU167	ERR049101	SUSCEPTIBLE	<0.06	<0.5
SMRU168	ERR049102	NON-SUSCEPTIBLE	0.064	0.064
SMRU169	ERR049103	NON-SUSCEPTIBLE	0.5	0.5
SMRU170	ERR049104	NON-SUSCEPTIBLE	0.125	0.125
SMRU171	ERR049105	NON-SUSCEPTIBLE	0.064	0.032
SMRU172	ERR049106	NON-SUSCEPTIBLE	0.125	0.125
SMRU173	ERR049107	SUSCEPTIBLE	<0.06	<0.5
SMRU174	ERR049108	SUSCEPTIBLE	<0.06	<0.5
SMRU175	ERR049109	NON-SUSCEPTIBLE	0.5	0.25
SMRU176	ERR049110	NON-SUSCEPTIBLE	0.125	0.064
SMRU177	ERR049111	NON-SUSCEPTIBLE	1	0.5
SMRU178	ERR049112	SUSCEPTIBLE	<0.06	<0.5
SMRU179	ERR049113	NON-SUSCEPTIBLE	1	1
SMRU180	ERR049114	SUSCEPTIBLE	<0.06	<0.5
SMRU181	ERR049115	SUSCEPTIBLE	<0.06	<0.5
SMRU182	ERR049116	NON-SUSCEPTIBLE	0.25	0.25
SMRU183	ERR049117	SUSCEPTIBLE	<0.06	<0.5
SMRU184	ERR049118	NON-SUSCEPTIBLE	0.064	0.064
SMRU185	ERR049119	SUSCEPTIBLE	<0.06	<0.5
SMRU186	ERR049120	SUSCEPTIBLE	<0.06	<0.5
SMRU187	ERR049121	NON-SUSCEPTIBLE	0.5	0.125
SMRU188	ERR049122	SUSCEPTIBLE	<0.06	<0.5
SMRU189	ERR049123	NON-SUSCEPTIBLE	0.125	0.125
SMRU190	ERR049124	SUSCEPTIBLE	<0.06	<0.5
SMRU191	ERR049125	SUSCEPTIBLE	0.032	0.064
SMRU192	ERR049126	SUSCEPTIBLE	<0.06	<0.5
SMRU193	ERR050056	NON-SUSCEPTIBLE	0.5	0.25
SMRU194	ERR050057	NON-SUSCEPTIBLE	1	0.5
SMRU195	ERR050058	SUSCEPTIBLE	<0.06	<0.5
SMRU196	ERR050059	SUSCEPTIBLE	<0.06	<0.5
SMRU197	ERR050060	SUSCEPTIBLE	<0.06	<0.5
SMRU198	ERR050061	NON-SUSCEPTIBLE	0.064	0.064
SMRU199	ERR050062	SUSCEPTIBLE	<0.06	<0.5
SMRU200	ERR050063	SUSCEPTIBLE	<0.06	<0.5
SMRU201	ERR050064	SUSCEPTIBLE	<0.06	<0.5
SMRU202	ERR050065	NON-SUSCEPTIBLE	0.5	0.5
SMRU203	ERR050066	NON-SUSCEPTIBLE	0.5	0.25
SMRU204	ERR050067	SUSCEPTIBLE	<0.06	<0.5
SMRU205	ERR050068	NON-SUSCEPTIBLE	0.125	0.25
SMRU206	ERR050069	SUSCEPTIBLE	<0.06	<0.5
SMRU207	ERR050070	SUSCEPTIBLE	<0.06	<0.5
SMRU208	ERR050071	SUSCEPTIBLE	<0.06	<0.5
SMRU209	ERR050072	NON-SUSCEPTIBLE	1	0.5
SMRU210	ERR050073	NON-SUSCEPTIBLE	0.064	0.064
SMRU211	ERR050074	SUSCEPTIBLE	<0.06	<0.5
SMRU212	ERR050075	SUSCEPTIBLE	<0.06	<0.5
SMRU213	ERR050076	NON-SUSCEPTIBLE	0.125	0.064
SMRU214	ERR050077	SUSCEPTIBLE	<0.06	<0.5
SMRU215	ERR050078	SUSCEPTIBLE	<0.06	<0.5
SMRU216	ERR050079	SUSCEPTIBLE	<0.06	<0.5
SMRU217	ERR049936	SUSCEPTIBLE	<0.06	<0.5
SMRU218	ERR049937	NON-SUSCEPTIBLE	0.5	0.25
SMRU219	ERR049938	NON-SUSCEPTIBLE	0.5	0.064
SMRU220	ERR049939	NON-SUSCEPTIBLE	0.125	0.125
SMRU221	ERR049940	NON-SUSCEPTIBLE	0.125	0.25
SMRU222	ERR049941	SUSCEPTIBLE	<0.06	<0.5
SMRU223	ERR049942	NON-SUSCEPTIBLE	0.25	0.125
SMRU224	ERR049943	SUSCEPTIBLE	<0.06	<0.5
SMRU225	ERR049944	SUSCEPTIBLE	<0.06	<0.5
SMRU226	ERR049945	NON-SUSCEPTIBLE	0.064	0.032
SMRU227	ERR049946	SUSCEPTIBLE	<0.06	<0.5
SMRU228	ERR049947	NON-SUSCEPTIBLE	0.125	0.064
SMRU229	ERR049948	SUSCEPTIBLE	<0.06	<0.5
SMRU230	ERR049949	NON-SUSCEPTIBLE	0.125	0.25
SMRU231	ERR049950	NON-SUSCEPTIBLE	0.5	0.25
SMRU232	ERR049951	NON-SUSCEPTIBLE	0.25	0.25
SMRU233	ERR049952	NON-SUSCEPTIBLE	0.25	0.125
SMRU234	ERR049953	SUSCEPTIBLE	<0.06	<0.5
SMRU235	ERR049954	NON-SUSCEPTIBLE	1	0.5
SMRU236	ERR049955	SUSCEPTIBLE	<0.06	<0.5
SMRU237	ERR049956	NON-SUSCEPTIBLE	1	0.5
SMRU238	ERR049957	NON-SUSCEPTIBLE	1	0.5
SMRU239	ERR049958	NON-SUSCEPTIBLE	0.064	0.064
SMRU240	ERR049959	SUSCEPTIBLE	<0.06	<0.5
SMRU241	ERR052578	SUSCEPTIBLE	<0.06	<0.5
SMRU242	ERR052579	SUSCEPTIBLE	<0.06	<0.5
SMRU243	ERR052580	SUSCEPTIBLE	<0.06	<0.5
SMRU244	ERR052581	NON-SUSCEPTIBLE	0.125	0.125
SMRU245	ERR052582	SUSCEPTIBLE	<0.06	<0.5
SMRU246	ERR052583	NON-SUSCEPTIBLE	0.5	0.25
SMRU247	ERR052584	SUSCEPTIBLE	<0.06	<0.5
SMRU248	ERR052585	SUSCEPTIBLE	<0.06	<0.5
SMRU249	ERR052586	SUSCEPTIBLE	<0.06	<0.5
SMRU250	ERR052587	SUSCEPTIBLE	<0.06	<0.5
SMRU251	ERR052588	SUSCEPTIBLE	<0.06	<0.5
SMRU252	ERR052589	SUSCEPTIBLE	0.032	0.064
SMRU253	ERR052590	NON-SUSCEPTIBLE	0.125	0.125
SMRU254	ERR052591	SUSCEPTIBLE	<0.06	<0.5
SMRU255	ERR052592	SUSCEPTIBLE	<0.06	<0.5
SMRU256	ERR052593	NON-SUSCEPTIBLE	0.25	0.064
SMRU257	ERR052594	NON-SUSCEPTIBLE	0.064	0.064
SMRU258	ERR052595	SUSCEPTIBLE	<0.06	<0.5
SMRU259	ERR052596	NON-SUSCEPTIBLE	0.5	0.5
SMRU260	ERR052597	NON-SUSCEPTIBLE	1	0.5
SMRU261	ERR052598	NON-SUSCEPTIBLE	1	0.5
SMRU262	ERR052599	SUSCEPTIBLE	<0.06	<0.5
SMRU263	ERR052600	SUSCEPTIBLE	<0.06	<0.5
SMRU264	ERR052601	NON-SUSCEPTIBLE	0.25	0.064
SMRU265	ERR047942	SUSCEPTIBLE	<0.06	<0.5
SMRU266	ERR047943	NON-SUSCEPTIBLE	0.064	0.064
SMRU267	ERR047944	SUSCEPTIBLE	<0.06	<0.5
SMRU268	ERR047945	NON-SUSCEPTIBLE	0.5	0.25
SMRU269	ERR047946	SUSCEPTIBLE	<0.06	<0.5
SMRU270	ERR047947	NON-SUSCEPTIBLE	0.125	0.064
SMRU271	ERR047948	SUSCEPTIBLE	<0.06	<0.5
SMRU272	ERR047949	SUSCEPTIBLE	<0.06	<0.5
SMRU273	ERR047950	SUSCEPTIBLE	<0.06	<0.5
SMRU274	ERR047951	SUSCEPTIBLE	<0.06	<0.5
SMRU275	ERR047952	NON-SUSCEPTIBLE	0.064	0.064
SMRU276	ERR047953	SUSCEPTIBLE	<0.06	<0.5
SMRU277	ERR047954	NON-SUSCEPTIBLE	0.064	0.064
SMRU278	ERR047955	NON-SUSCEPTIBLE	0.25	0.25
SMRU279	ERR047956	NON-SUSCEPTIBLE	0.064	0.064
SMRU280	ERR047957	NON-SUSCEPTIBLE	0.125	0.032
SMRU281	ERR047958	NON-SUSCEPTIBLE	0.25	0.125
SMRU282	ERR047959	SUSCEPTIBLE	<0.06	<0.5
SMRU283	ERR047960	NON-SUSCEPTIBLE	0.064	0.032
SMRU284	ERR047961	NON-SUSCEPTIBLE	0.25	0.064
SMRU285	ERR047962	SUSCEPTIBLE	<0.06	<0.5
SMRU287	ERR047964	SUSCEPTIBLE	<0.06	<0.5
SMRU288	ERR047965	SUSCEPTIBLE	0.032	0.064
SMRU289	ERR047966	SUSCEPTIBLE	<0.06	<0.5
SMRU290	ERR047967	NON-SUSCEPTIBLE	0.064	0.032
SMRU291	ERR047968	SUSCEPTIBLE	<0.06	<0.5
SMRU292	ERR047969	SUSCEPTIBLE	<0.06	<0.5
SMRU293	ERR047970	SUSCEPTIBLE	<0.06	<0.5
SMRU294	ERR047971	SUSCEPTIBLE	<0.06	<0.5
SMRU295	ERR047972	NON-SUSCEPTIBLE	0.25	0.064
SMRU296	ERR047973	SUSCEPTIBLE	<0.06	<0.5
SMRU297	ERR047974	SUSCEPTIBLE	<0.06	<0.5
SMRU298	ERR047975	SUSCEPTIBLE	<0.06	<0.5
SMRU299	ERR047976	SUSCEPTIBLE	<0.06	<0.5
SMRU300	ERR047977	NON-SUSCEPTIBLE	0.064	0.064
SMRU301	ERR047978	NON-SUSCEPTIBLE	0.125	0.125
SMRU302	ERR047979	SUSCEPTIBLE	0.032	0.032
SMRU303	ERR047980	NON-SUSCEPTIBLE	0.064	0.064
SMRU304	ERR047981	NON-SUSCEPTIBLE	1	0.5
SMRU305	ERR047982	NON-SUSCEPTIBLE	0.064	0.032
SMRU306	ERR047983	NON-SUSCEPTIBLE	0.25	0.5
SMRU307	ERR047984	SUSCEPTIBLE	<0.06	<0.5
SMRU308	ERR047985	NON-SUSCEPTIBLE	0.5	0.25
SMRU309	ERR047986	SUSCEPTIBLE	<0.06	<0.5
SMRU310	ERR047987	SUSCEPTIBLE	<0.06	<0.5
SMRU311	ERR047988	SUSCEPTIBLE	0.032	0.016
SMRU312	ERR047989	SUSCEPTIBLE	<0.06	<0.5
SMRU313	ERR048038	SUSCEPTIBLE	<0.06	<0.5
SMRU314	ERR048039	NON-SUSCEPTIBLE	1	1
SMRU315	ERR048040	NON-SUSCEPTIBLE	0.064	0.064
SMRU316	ERR048041	SUSCEPTIBLE	<0.06	<0.5
SMRU317	ERR048042	SUSCEPTIBLE	<0.06	<0.5
SMRU318	ERR048043	NON-SUSCEPTIBLE	0.125	0.064
SMRU319	ERR048044	NON-SUSCEPTIBLE	0.064	0.032
SMRU320	ERR048045	SUSCEPTIBLE	0.032	0.032
SMRU321	ERR048046	NON-SUSCEPTIBLE	0.25	0.25
SMRU323	ERR048048	NON-SUSCEPTIBLE	0.125	0.064
SMRU324	ERR048049	NON-SUSCEPTIBLE	0.125	0.125
SMRU325	ERR048050	SUSCEPTIBLE	<0.06	<0.5
SMRU326	ERR048051	SUSCEPTIBLE	<0.06	<0.5
SMRU327	ERR048052	SUSCEPTIBLE	<0.06	<0.5
SMRU328	ERR048053	NON-SUSCEPTIBLE	0.125	0.25
SMRU329	ERR048054	SUSCEPTIBLE	0.032	0.032
SMRU330	ERR048055	SUSCEPTIBLE	<0.06	<0.5
SMRU331	ERR048056	NON-SUSCEPTIBLE	0.5	0.5
SMRU332	ERR048057	NON-SUSCEPTIBLE	0.064	0.064
SMRU333	ERR048058	NON-SUSCEPTIBLE	0.25	0.125
SMRU334	ERR048059	NON-SUSCEPTIBLE	0.5	0.5
SMRU335	ERR048060	SUSCEPTIBLE	<0.06	<0.5
SMRU336	ERR048061	SUSCEPTIBLE	<0.06	<0.5
SMRU337	ERR048062	SUSCEPTIBLE	<0.06	<0.5
SMRU338	ERR048063	SUSCEPTIBLE	<0.06	<0.5
SMRU339	ERR048064	SUSCEPTIBLE	<0.06	<0.5
SMRU340	ERR048065	SUSCEPTIBLE	<0.06	<0.5
SMRU341	ERR048066	SUSCEPTIBLE	<0.06	<0.5
SMRU342	ERR048067	SUSCEPTIBLE	<0.06	<0.5
SMRU343	ERR048068	SUSCEPTIBLE	<0.06	<0.5
SMRU344	ERR048069	NON-SUSCEPTIBLE	2	0.5
SMRU345	ERR048070	NON-SUSCEPTIBLE	0.25	0.5
SMRU346	ERR048071	NON-SUSCEPTIBLE	0.25	0.125
SMRU347	ERR048072	NON-SUSCEPTIBLE	0.125	0.25
SMRU348	ERR048073	SUSCEPTIBLE	<0.06	<0.5
SMRU349	ERR048074	SUSCEPTIBLE	<0.06	<0.5
SMRU350	ERR048075	NON-SUSCEPTIBLE	0.25	0.064
SMRU351	ERR048076	SUSCEPTIBLE	<0.06	<0.5
SMRU352	ERR048077	SUSCEPTIBLE	<0.06	<0.5
SMRU353	ERR048078	NON-SUSCEPTIBLE	0.064	0.064
SMRU354	ERR048079	SUSCEPTIBLE	<0.06	<0.5
SMRU355	ERR048080	NON-SUSCEPTIBLE	0.125	0.064
SMRU356	ERR048081	SUSCEPTIBLE	<0.06	<0.5
SMRU357	ERR048082	SUSCEPTIBLE	<0.06	<0.5
SMRU358	ERR048083	NON-SUSCEPTIBLE	0.5	0.25
SMRU359	ERR048084	SUSCEPTIBLE	0.032	0.032
SMRU360	ERR048085	NON-SUSCEPTIBLE	0.125	0.064
SMRU361	ERR047990	SUSCEPTIBLE	<0.06	<0.5
SMRU362	ERR047991	SUSCEPTIBLE	<0.06	<0.5
SMRU363	ERR047992	NON-SUSCEPTIBLE	0.5	0.5
SMRU364	ERR047993	SUSCEPTIBLE	<0.06	<0.5
SMRU365	ERR047994	SUSCEPTIBLE	0.032	0.032
SMRU366	ERR047995	SUSCEPTIBLE	<0.06	<0.5
SMRU367	ERR047996	NON-SUSCEPTIBLE	0.064	0.032
SMRU368	ERR047997	NON-SUSCEPTIBLE	0.064	0.032
SMRU369	ERR047998	NON-SUSCEPTIBLE	0.064	0.064
SMRU370	ERR047999	SUSCEPTIBLE	<0.06	<0.5
SMRU371	ERR048000	SUSCEPTIBLE	0.032	0.032
SMRU372	ERR048001	NON-SUSCEPTIBLE	0.125	0.064
SMRU373	ERR048002	SUSCEPTIBLE	<0.06	<0.5
SMRU374	ERR048003	SUSCEPTIBLE	<0.06	<0.5
SMRU375	ERR048004	SUSCEPTIBLE	<0.06	<0.5
SMRU376	ERR048005	SUSCEPTIBLE	<0.06	<0.5
SMRU377	ERR048006	NON-SUSCEPTIBLE	0.125	0.064
SMRU378	ERR048007	NON-SUSCEPTIBLE	0.5	0.25
SMRU379	ERR048008	SUSCEPTIBLE	<0.06	<0.5
SMRU380	ERR048009	SUSCEPTIBLE	<0.06	<0.5
SMRU381	ERR048010	SUSCEPTIBLE	<0.06	<0.5
SMRU382	ERR048011	NON-SUSCEPTIBLE	0.5	0.5
SMRU383	ERR048012	SUSCEPTIBLE	0.032	0.125
SMRU384	ERR048013	NON-SUSCEPTIBLE	1	0.5
SMRU385	ERR048014	SUSCEPTIBLE	<0.06	<0.5
SMRU386	ERR048015	SUSCEPTIBLE	<0.06	<0.5
SMRU387	ERR048016	SUSCEPTIBLE	<0.06	<0.5
SMRU388	ERR048017	SUSCEPTIBLE	<0.06	<0.5
SMRU389	ERR048018	NON-SUSCEPTIBLE	0.125	0.125
SMRU390	ERR048019	SUSCEPTIBLE	<0.06	<0.5
SMRU391	ERR048020	NON-SUSCEPTIBLE	1	0.5
SMRU392	ERR048021	SUSCEPTIBLE	<0.06	<0.5
SMRU393	ERR048022	SUSCEPTIBLE	<0.06	<0.5
SMRU394	ERR048023	SUSCEPTIBLE	0.032	0.032
SMRU395	ERR048024	SUSCEPTIBLE	<0.06	<0.5
SMRU396	ERR048025	NON-SUSCEPTIBLE	0.064	0.032
SMRU397	ERR048026	NON-SUSCEPTIBLE	0.5	0.5
SMRU398	ERR048027	NON-SUSCEPTIBLE	1	0.5
SMRU399	ERR048028	NON-SUSCEPTIBLE	0.064	0.064
SMRU400	ERR048029	NON-SUSCEPTIBLE	0.125	0.064
SMRU401	ERR048030	NON-SUSCEPTIBLE	0.064	0.064
SMRU402	ERR048031	NON-SUSCEPTIBLE	0.125	0.064
SMRU403	ERR048032	NON-SUSCEPTIBLE	1	0.5
SMRU404	ERR048033	NON-SUSCEPTIBLE	1	0.5
SMRU405	ERR048034	SUSCEPTIBLE	<0.06	<0.5
SMRU406	ERR048035	SUSCEPTIBLE	0.032	0.032
SMRU407	ERR048036	NON-SUSCEPTIBLE	0.25	0.5
SMRU408	ERR048037	NON-SUSCEPTIBLE	0.125	0.064
SMRU409	ERR048086	SUSCEPTIBLE	<0.06	<0.5
SMRU410	ERR048087	NON-SUSCEPTIBLE	0.5	0.25
SMRU411	ERR048088	SUSCEPTIBLE	<0.06	<0.5
SMRU412	ERR048089	SUSCEPTIBLE	<0.06	<0.5
SMRU413	ERR048090	NON-SUSCEPTIBLE	0.125	0.064
SMRU414	ERR048091	NON-SUSCEPTIBLE	0.125	0.125
SMRU415	ERR048092	SUSCEPTIBLE	0.032	0.032
SMRU416	ERR048093	SUSCEPTIBLE	<0.06	<0.5
SMRU417	ERR048094	SUSCEPTIBLE	<0.06	<0.5
SMRU418	ERR048095	SUSCEPTIBLE	<0.06	<0.5
SMRU419	ERR048096	NON-SUSCEPTIBLE	0.125	0.064
SMRU420	ERR048097	SUSCEPTIBLE	<0.06	<0.5
SMRU421	ERR048098	NON-SUSCEPTIBLE	0.125	0.125
SMRU422	ERR048099	SUSCEPTIBLE	<0.06	<0.5
SMRU423	ERR048100	NON-SUSCEPTIBLE	0.25	0.125
SMRU424	ERR048101	NON-SUSCEPTIBLE	0.125	0.25
SMRU425	ERR048102	SUSCEPTIBLE	0.032	0.032
SMRU426	ERR048103	NON-SUSCEPTIBLE	2	1
SMRU427	ERR048104	SUSCEPTIBLE	<0.06	<0.5
SMRU428	ERR048105	SUSCEPTIBLE	<0.06	<0.5
SMRU429	ERR048106	SUSCEPTIBLE	0.032	0.016
SMRU430	ERR048107	NON-SUSCEPTIBLE	0.064	0.064
SMRU431	ERR048108	SUSCEPTIBLE	<0.06	<0.5
SMRU432	ERR048109	SUSCEPTIBLE	<0.06	<0.5
SMRU433	ERR048110	SUSCEPTIBLE	<0.06	<0.5
SMRU434	ERR048111	NON-SUSCEPTIBLE	0.25	0.125
SMRU435	ERR048112	NON-SUSCEPTIBLE	0.25	0.125
SMRU436	ERR048113	SUSCEPTIBLE	<0.06	<0.5
SMRU437	ERR048114	NON-SUSCEPTIBLE	0.25	0.5
SMRU438	ERR048115	NON-SUSCEPTIBLE	1	0.5
SMRU439	ERR048116	SUSCEPTIBLE	<0.06	<0.5
SMRU440	ERR048117	SUSCEPTIBLE	<0.06	<0.5
SMRU441	ERR048118	NON-SUSCEPTIBLE	1	1
SMRU442	ERR048119	SUSCEPTIBLE	<0.06	<0.5
SMRU443	ERR048120	SUSCEPTIBLE	<0.06	<0.5
SMRU444	ERR048121	NON-SUSCEPTIBLE	0.125	0.064
SMRU445	ERR048122	SUSCEPTIBLE	<0.06	<0.5
SMRU446	ERR048123	NON-SUSCEPTIBLE	0.25	0.125
SMRU447	ERR048124	SUSCEPTIBLE	<0.06	<0.5
SMRU448	ERR048125	SUSCEPTIBLE	<0.06	<0.5
SMRU449	ERR048126	NON-SUSCEPTIBLE	0.125	0.125
SMRU450	ERR048127	SUSCEPTIBLE	0.032	0.032
SMRU451	ERR048128	NON-SUSCEPTIBLE	1	1
SMRU452	ERR048129	SUSCEPTIBLE	<0.06	<0.5
SMRU453	ERR048130	SUSCEPTIBLE	<0.06	<0.5
SMRU454	ERR048131	NON-SUSCEPTIBLE	0.125	0.125
SMRU455	ERR048132	SUSCEPTIBLE	<0.06	<0.5
SMRU456	ERR048133	SUSCEPTIBLE	<0.06	<0.5
SMRU457	ERR048134	SUSCEPTIBLE	<0.06	<0.5
SMRU458	ERR048135	NON-SUSCEPTIBLE	0.25	0.125
SMRU459	ERR048136	NON-SUSCEPTIBLE	0.5	0.125
SMRU460	ERR048137	SUSCEPTIBLE	<0.06	<0.5
SMRU461	ERR048138	NON-SUSCEPTIBLE	0.25	0.064
SMRU462	ERR048139	SUSCEPTIBLE	<0.06	<0.5
SMRU463	ERR048140	SUSCEPTIBLE	<0.06	<0.5
SMRU464	ERR048141	SUSCEPTIBLE	<0.06	<0.5
SMRU465	ERR048142	SUSCEPTIBLE	<0.06	<0.5
SMRU466	ERR048143	NON-SUSCEPTIBLE	0.25	0.125
SMRU467	ERR048144	SUSCEPTIBLE	<0.06	<0.5
SMRU468	ERR048145	SUSCEPTIBLE	<0.06	<0.5
SMRU469	ERR048146	SUSCEPTIBLE	<0.06	<0.5
SMRU470	ERR048147	NON-SUSCEPTIBLE	0.25	0.125
SMRU471	ERR048148	NON-SUSCEPTIBLE	0.25	0.125
SMRU472	ERR048149	NON-SUSCEPTIBLE	0.5	0.25
SMRU473	ERR048150	SUSCEPTIBLE	<0.06	<0.5
SMRU474	ERR048151	NON-SUSCEPTIBLE	0.125	0.125
SMRU475	ERR048152	SUSCEPTIBLE	<0.06	<0.5
SMRU476	ERR048153	NON-SUSCEPTIBLE	1	0.5
SMRU477	ERR048154	NON-SUSCEPTIBLE	1	0.5
SMRU478	ERR048155	NON-SUSCEPTIBLE	0.25	0.125
SMRU479	ERR048156	NON-SUSCEPTIBLE	0.125	0.032
SMRU480	ERR048157	NON-SUSCEPTIBLE	1	0.5
SMRU481	ERR048158	NON-SUSCEPTIBLE	0.25	0.064
SMRU482	ERR048159	NON-SUSCEPTIBLE	0.25	0.125
SMRU483	ERR048160	SUSCEPTIBLE	<0.06	<0.5
SMRU484	ERR048161	NON-SUSCEPTIBLE	1	0.5
SMRU485	ERR048162	NON-SUSCEPTIBLE	0.125	0.064
SMRU486	ERR048163	NON-SUSCEPTIBLE	0.25	0.064
SMRU487	ERR048164	NON-SUSCEPTIBLE	2	0.5
SMRU488	ERR048165	SUSCEPTIBLE	<0.06	<0.5
SMRU489	ERR048166	SUSCEPTIBLE	<0.06	<0.5
SMRU490	ERR048167	SUSCEPTIBLE	<0.06	<0.5
SMRU491	ERR048168	SUSCEPTIBLE	<0.06	<0.5
SMRU492	ERR048169	NON-SUSCEPTIBLE	0.5	0.25
SMRU493	ERR048170	NON-SUSCEPTIBLE	0.5	0.125
SMRU494	ERR048171	NON-SUSCEPTIBLE	1	0.5
SMRU495	ERR048172	NON-SUSCEPTIBLE	0.5	0.25
SMRU496	ERR048173	NON-SUSCEPTIBLE	0.5	0.25
SMRU497	ERR048174	NON-SUSCEPTIBLE	0.064	0.064
SMRU498	ERR048175	SUSCEPTIBLE	<0.06	<0.5
SMRU499	ERR048176	SUSCEPTIBLE	<0.06	<0.5
SMRU500	ERR048177	SUSCEPTIBLE	<0.06	<0.5
SMRU501	ERR048178	NON-SUSCEPTIBLE	0.5	0.25
SMRU502	ERR048179	SUSCEPTIBLE	<0.06	<0.5
SMRU503	ERR048180	NON-SUSCEPTIBLE	0.5	0.5
SMRU504	ERR048181	SUSCEPTIBLE	<0.06	<0.5
SMRU505	ERR048182	SUSCEPTIBLE	<0.06	<0.5
SMRU506	ERR048183	SUSCEPTIBLE	<0.06	<0.5
SMRU507	ERR048184	NON-SUSCEPTIBLE	0.064	0.064
SMRU508	ERR048185	NON-SUSCEPTIBLE	0.25	0.25
SMRU509	ERR048186	SUSCEPTIBLE	<0.06	<0.5
SMRU510	ERR048187	SUSCEPTIBLE	<0.06	<0.5
SMRU511	ERR048188	NON-SUSCEPTIBLE	0.5	0.25
SMRU512	ERR048189	SUSCEPTIBLE	<0.06	<0.5
SMRU513	ERR048190	SUSCEPTIBLE	<0.06	<0.5
SMRU514	ERR048191	NON-SUSCEPTIBLE	0.125	0.125
SMRU515	ERR048192	SUSCEPTIBLE	<0.06	<0.5
SMRU516	ERR048193	NON-SUSCEPTIBLE	0.064	0.032
SMRU517	ERR048194	N/A	N/A	N/A
SMRU518	ERR048195	N/A	N/A	N/A
SMRU519	ERR048196	N/A	N/A	N/A
SMRU520	ERR048197	N/A	N/A	N/A
SMRU521	ERR048198	N/A	N/A	N/A
SMRU522	ERR048199	N/A	N/A	N/A
SMRU523	ERR048200	N/A	N/A	N/A
SMRU524	ERR048201	N/A	N/A	N/A
SMRU525	ERR048202	N/A	N/A	N/A
SMRU526	ERR048203	N/A	N/A	N/A
SMRU527	ERR048204	N/A	N/A	N/A
SMRU528	ERR048205	N/A	N/A	N/A
SMRU529	ERR273480	N/A	N/A	N/A
SMRU531	ERR273482	N/A	N/A	N/A
SMRU532	ERR273483	N/A	N/A	N/A
SMRU533	ERR273484	N/A	N/A	N/A
SMRU534	ERR273485	SUSCEPTIBLE	<0.06	<0.5
SMRU535	ERR273486	SUSCEPTIBLE	<0.06	<0.5
SMRU536	ERR273487	NON-SUSCEPTIBLE	0.125	0.064
SMRU537	ERR273488	NON-SUSCEPTIBLE	0.5	0.5
SMRU538	ERR273489	SUSCEPTIBLE	<0.06	<0.5
SMRU539	ERR273490	NON-SUSCEPTIBLE	0.064	0.125
SMRU540	ERR273491	NON-SUSCEPTIBLE	0.5	0.5
SMRU541	ERR273492	SUSCEPTIBLE	<0.06	<0.5
SMRU542	ERR273493	NON-SUSCEPTIBLE	0.125	0.064
SMRU543	ERR273494	SUSCEPTIBLE	<0.06	<0.5
SMRU544	ERR273495	SUSCEPTIBLE	<0.06	<0.5
SMRU545	ERR273496	SUSCEPTIBLE	0.032	0.032
SMRU546	ERR273497	SUSCEPTIBLE	<0.06	<0.5
SMRU547	ERR273498	NON-SUSCEPTIBLE	0.125	0.064
SMRU548	ERR273499	SUSCEPTIBLE	<0.06	<0.5
SMRU549	ERR273500	NON-SUSCEPTIBLE	0.25	0.125
SMRU550	ERR273501	NON-SUSCEPTIBLE	0.25	0.25
SMRU551	ERR273502	NON-SUSCEPTIBLE	0.064	0.064
SMRU552	ERR273503	NON-SUSCEPTIBLE	1	0.5
SMRU553	ERR052626	SUSCEPTIBLE	<0.06	<0.5
SMRU554	ERR052627	SUSCEPTIBLE	<0.06	<0.5
SMRU555	ERR052628	NON-SUSCEPTIBLE	2	1
SMRU556	ERR052629	NON-SUSCEPTIBLE	1	1
SMRU557	ERR052630	SUSCEPTIBLE	<0.06	<0.5
SMRU558	ERR052631	SUSCEPTIBLE	<0.06	<0.5
SMRU559	ERR052632	NON-SUSCEPTIBLE	0.064	0.032
SMRU560	ERR052633	SUSCEPTIBLE	<0.06	<0.5
SMRU561	ERR052634	SUSCEPTIBLE	<0.06	<0.5
SMRU562	ERR052635	SUSCEPTIBLE	0.032	0.016
SMRU563	ERR052636	SUSCEPTIBLE	<0.06	<0.5
SMRU564	ERR052637	NON-SUSCEPTIBLE	0.5	0.25
SMRU565	ERR052638	SUSCEPTIBLE	<0.06	<0.5
SMRU566	ERR052639	SUSCEPTIBLE	0.032	0.032
SMRU567	ERR052640	NON-SUSCEPTIBLE	0.125	0.064
SMRU568	ERR052641	SUSCEPTIBLE	0.032	0.064
SMRU569	ERR052642	NON-SUSCEPTIBLE	0.5	0.25
SMRU570	ERR052643	NON-SUSCEPTIBLE	0.125	0.064
SMRU571	ERR052644	SUSCEPTIBLE	0.032	0.064
SMRU572	ERR052645	SUSCEPTIBLE	<0.06	<0.5
SMRU573	ERR052646	SUSCEPTIBLE	<0.06	<0.5
SMRU574	ERR052647	NON-SUSCEPTIBLE	0.5	0.25
SMRU575	ERR052648	NON-SUSCEPTIBLE	0.5	0.5
SMRU576	ERR052649	NON-SUSCEPTIBLE	1	0.5
SMRU577	ERR052650	NON-SUSCEPTIBLE	0.5	0.25
SMRU578	ERR051412	NON-SUSCEPTIBLE	0.5	0.5
SMRU579	ERR051413	NON-SUSCEPTIBLE	0.25	0.064
SMRU580	ERR051414	SUSCEPTIBLE	<0.06	<0.5
SMRU581	ERR051415	SUSCEPTIBLE	<0.06	<0.5
SMRU582	ERR051416	NON-SUSCEPTIBLE	1	0.5
SMRU583	ERR051417	SUSCEPTIBLE	0.032	0.064
SMRU584	ERR051418	SUSCEPTIBLE	<0.06	<0.5
SMRU585	ERR051419	NON-SUSCEPTIBLE	1	0.5
SMRU586	ERR051420	NON-SUSCEPTIBLE	0.125	0.064
SMRU587	ERR051421	SUSCEPTIBLE	<0.06	<0.5
SMRU588	ERR051422	NON-SUSCEPTIBLE	1	0.5
SMRU589	ERR051423	SUSCEPTIBLE	<0.06	<0.5
SMRU590	ERR051424	NON-SUSCEPTIBLE	0.064	0.064
SMRU591	ERR051425	NON-SUSCEPTIBLE	0.125	0.125
SMRU592	ERR051426	SUSCEPTIBLE	<0.06	<0.5
SMRU593	ERR051427	NON-SUSCEPTIBLE	0.5	0.25
SMRU594	ERR051428	NON-SUSCEPTIBLE	0.5	0.25
SMRU595	ERR051429	NON-SUSCEPTIBLE	1	1
SMRU596	ERR051430	NON-SUSCEPTIBLE	0.125	0.064
SMRU597	ERR051431	NON-SUSCEPTIBLE	0.5	0.5
SMRU598	ERR051432	SUSCEPTIBLE	<0.06	<0.5
SMRU599	ERR051433	NON-SUSCEPTIBLE	0.064	0.064
SMRU600	ERR051434	NON-SUSCEPTIBLE	1	2
SMRU601	ERR051435	NON-SUSCEPTIBLE	1	0.5
SMRU602	ERR051436	NON-SUSCEPTIBLE	0.25	0.25
SMRU603	ERR051437	NON-SUSCEPTIBLE	0.5	0.25
SMRU604	ERR051438	NON-SUSCEPTIBLE	0.5	0.25
SMRU605	ERR051439	SUSCEPTIBLE	<0.06	<0.5
SMRU606	ERR051440	NON-SUSCEPTIBLE	0.125	0.064
SMRU607	ERR051441	NON-SUSCEPTIBLE	0.125	0.064
SMRU608	ERR051442	NON-SUSCEPTIBLE	0.25	0.25
SMRU609	ERR051443	NON-SUSCEPTIBLE	1	0.5
SMRU610	ERR051444	NON-SUSCEPTIBLE	0.064	0.064
SMRU611	ERR051445	NON-SUSCEPTIBLE	0.5	0.25
SMRU612	ERR051446	NON-SUSCEPTIBLE	2	1
SMRU613	ERR051447	SUSCEPTIBLE	<0.06	<0.5
SMRU614	ERR051448	SUSCEPTIBLE	<0.06	<0.5
SMRU615	ERR051449	NON-SUSCEPTIBLE	1	0.5
SMRU616	ERR051450	NON-SUSCEPTIBLE	1	1
SMRU617	ERR051451	SUSCEPTIBLE	<0.06	<0.5
SMRU618	ERR051452	NON-SUSCEPTIBLE	0.125	0.125
SMRU619	ERR051453	NON-SUSCEPTIBLE	0.064	0.064
SMRU620	ERR051454	NON-SUSCEPTIBLE	0.125	0.125
SMRU621	ERR051455	NON-SUSCEPTIBLE	0.125	0.064
SMRU622	ERR051456	NON-SUSCEPTIBLE	0.25	0.125
SMRU623	ERR051457	NON-SUSCEPTIBLE	0.5	0.25
SMRU624	ERR051458	NON-SUSCEPTIBLE	2	1
SMRU625	ERR273504	NON-SUSCEPTIBLE	0.125	0.125
SMRU626	ERR273505	NON-SUSCEPTIBLE	0.25	0.25
SMRU627	ERR273506	SUSCEPTIBLE	<0.06	<0.5
SMRU628	ERR273507	NON-SUSCEPTIBLE	2	1
SMRU629	ERR273508	NON-SUSCEPTIBLE	0.25	0.125
SMRU630	ERR273509	SUSCEPTIBLE	<0.06	<0.5
SMRU631	ERR273510	NON-SUSCEPTIBLE	0.5	0.25
SMRU632	ERR273511	SUSCEPTIBLE	<0.06	<0.5
SMRU633	ERR273512	SUSCEPTIBLE	<0.06	<0.5
SMRU634	ERR273513	NON-SUSCEPTIBLE	0.125	0.064
SMRU635	ERR273514	NON-SUSCEPTIBLE	0.125	0.125
SMRU636	ERR273515	NON-SUSCEPTIBLE	0.25	0.125
SMRU637	ERR273516	SUSCEPTIBLE	<0.06	<0.5
SMRU638	ERR273517	NON-SUSCEPTIBLE	0.125	0.125
SMRU639	ERR273518	NON-SUSCEPTIBLE	0.125	0.125
SMRU640	ERR273519	SUSCEPTIBLE	<0.06	<0.5
SMRU641	ERR273520	NON-SUSCEPTIBLE	0.125	0.125
SMRU642	ERR273521	NON-SUSCEPTIBLE	1	0.5
SMRU643	ERR273522	NON-SUSCEPTIBLE	0.064	0.064
SMRU644	ERR273523	SUSCEPTIBLE	<0.06	<0.5
SMRU645	ERR273524	NON-SUSCEPTIBLE	0.5	0.25
SMRU646	ERR273525	NON-SUSCEPTIBLE	1	0.5
SMRU647	ERR273526	NON-SUSCEPTIBLE	0.25	0.064
SMRU648	ERR273527	NON-SUSCEPTIBLE	1	0.5
SMRU649	ERR051459	SUSCEPTIBLE	0.032	0.032
SMRU650	ERR051460	SUSCEPTIBLE	<0.06	<0.5
SMRU651	ERR051461	SUSCEPTIBLE	<0.06	<0.5
SMRU652	ERR051462	NON-SUSCEPTIBLE	0.5	0.5
SMRU653	ERR051463	SUSCEPTIBLE	<0.06	<0.5
SMRU654	ERR051464	SUSCEPTIBLE	<0.06	<0.5
SMRU655	ERR051465	SUSCEPTIBLE	<0.06	<0.5
SMRU656	ERR051466	SUSCEPTIBLE	<0.06	<0.5
SMRU657	ERR051467	NON-SUSCEPTIBLE	0.125	0.064
SMRU658	ERR051468	SUSCEPTIBLE	<0.06	<0.5
SMRU659	ERR051469	SUSCEPTIBLE	<0.06	<0.5
SMRU660	ERR051470	SUSCEPTIBLE	<0.06	<0.5
SMRU661	ERR051471	NON-SUSCEPTIBLE	0.5	0.125
SMRU662	ERR051472	SUSCEPTIBLE	<0.06	<0.5
SMRU663	ERR051473	NON-SUSCEPTIBLE	0.25	0.125
SMRU664	ERR051474	SUSCEPTIBLE	0.032	0.032
SMRU665	ERR051475	NON-SUSCEPTIBLE	1	0.5
SMRU666	ERR051476	NON-SUSCEPTIBLE	1	0.5
SMRU667	ERR051477	NON-SUSCEPTIBLE	0.5	0.5
SMRU668	ERR051478	SUSCEPTIBLE	<0.06	<0.5
SMRU669	ERR051479	SUSCEPTIBLE	<0.06	<0.5
SMRU670	ERR051480	SUSCEPTIBLE	<0.06	<0.5
SMRU671	ERR051481	NON-SUSCEPTIBLE	0.064	0.064
SMRU672	ERR051482	NON-SUSCEPTIBLE	0.125	0.064
SMRU673	ERR051483	NON-SUSCEPTIBLE	1	0.5
SMRU674	ERR051484	SUSCEPTIBLE	<0.06	<0.5
SMRU675	ERR051485	NON-SUSCEPTIBLE	0.25	0.125
SMRU676	ERR051486	SUSCEPTIBLE	<0.06	<0.5
SMRU677	ERR051487	NON-SUSCEPTIBLE	0.125	0.125
SMRU678	ERR051488	NON-SUSCEPTIBLE	1	0.5
SMRU679	ERR051489	NON-SUSCEPTIBLE	0.25	0.25
SMRU680	ERR051490	NON-SUSCEPTIBLE	0.125	0.125
SMRU681	ERR051491	NON-SUSCEPTIBLE	0.064	0.064
SMRU682	ERR051492	SUSCEPTIBLE	<0.06	<0.5
SMRU683	ERR051493	NON-SUSCEPTIBLE	0.5	0.5
SMRU684	ERR051494	NON-SUSCEPTIBLE	0.125	0.125
SMRU685	ERR051495	SUSCEPTIBLE	<0.06	<0.5
SMRU686	ERR051496	SUSCEPTIBLE	<0.06	<0.5
SMRU687	ERR051497	NON-SUSCEPTIBLE	1	0.5
SMRU688	ERR051498	NON-SUSCEPTIBLE	1	0.5
SMRU689	ERR051499	NON-SUSCEPTIBLE	1	0.5
SMRU690	ERR051500	SUSCEPTIBLE	<0.06	<0.5
SMRU691	ERR051501	NON-SUSCEPTIBLE	2	2
SMRU692	ERR051502	SUSCEPTIBLE	<0.06	<0.5
SMRU693	ERR051503	SUSCEPTIBLE	<0.06	<0.5
SMRU694	ERR051504	NON-SUSCEPTIBLE	0.064	0.064
SMRU695	ERR051505	NON-SUSCEPTIBLE	0.25	0.125
SMRU696	ERR051506	NON-SUSCEPTIBLE	0.5	0.5
SMRU697	ERR051507	SUSCEPTIBLE	<0.06	<0.5
SMRU698	ERR051508	NON-SUSCEPTIBLE	0.064	0.064
SMRU699	ERR051509	NON-SUSCEPTIBLE	0.5	0.25
SMRU700	ERR051510	NON-SUSCEPTIBLE	0.25	0.125
SMRU701	ERR051511	SUSCEPTIBLE	<0.06	<0.5
SMRU702	ERR051512	SUSCEPTIBLE	<0.06	<0.5
SMRU703	ERR051513	NON-SUSCEPTIBLE	2	1
SMRU704	ERR051514	NON-SUSCEPTIBLE	1	0.5
SMRU705	ERR051515	NON-SUSCEPTIBLE	1	0.5
SMRU706	ERR051516	SUSCEPTIBLE	<0.06	<0.5
SMRU707	ERR051517	NON-SUSCEPTIBLE	0.064	0.064
SMRU708	ERR051518	SUSCEPTIBLE	<0.06	<0.5
SMRU709	ERR051519	NON-SUSCEPTIBLE	0.5	0.5
SMRU710	ERR051520	NON-SUSCEPTIBLE	0.125	0.125
SMRU711	ERR051521	NON-SUSCEPTIBLE	0.25	0.25
SMRU712	ERR051522	SUSCEPTIBLE	<0.06	<0.5
SMRU713	ERR051523	SUSCEPTIBLE	<0.06	<0.5
SMRU714	ERR051524	NON-SUSCEPTIBLE	0.5	0.5
SMRU715	ERR051525	NON-SUSCEPTIBLE	0.125	0.25
SMRU716	ERR051526	SUSCEPTIBLE	<0.06	<0.5
SMRU717	ERR051527	NON-SUSCEPTIBLE	0.5	0.25
SMRU718	ERR051528	SUSCEPTIBLE	<0.06	<0.5
SMRU719	ERR051529	SUSCEPTIBLE	<0.06	<0.5
SMRU720	ERR051530	SUSCEPTIBLE	<0.06	<0.5
SMRU721	ERR051531	NON-SUSCEPTIBLE	0.25	0.125
SMRU722	ERR051532	SUSCEPTIBLE	<0.06	<0.5
SMRU723	ERR051533	SUSCEPTIBLE	<0.06	<0.5
SMRU724	ERR051534	SUSCEPTIBLE	<0.06	<0.5
SMRU725	ERR051535	SUSCEPTIBLE	<0.06	<0.5
SMRU726	ERR051536	SUSCEPTIBLE	<0.06	<0.5
SMRU727	ERR051537	SUSCEPTIBLE	<0.06	<0.5
SMRU728	ERR051538	SUSCEPTIBLE	<0.06	<0.5
SMRU729	ERR051539	NON-SUSCEPTIBLE	0.25	0.125
SMRU730	ERR051540	SUSCEPTIBLE	<0.06	<0.5
SMRU731	ERR051541	NON-SUSCEPTIBLE	1	0.5
SMRU732	ERR051542	NON-SUSCEPTIBLE	0.125	0.064
SMRU733	ERR051543	NON-SUSCEPTIBLE	0.125	0.125
SMRU734	ERR051544	SUSCEPTIBLE	<0.06	<0.5
SMRU735	ERR051545	NON-SUSCEPTIBLE	1	0.5
SMRU736	ERR051546	SUSCEPTIBLE	0.032	0.032
SMRU737	ERR051547	NON-SUSCEPTIBLE	0.25	0.25
SMRU738	ERR051548	NON-SUSCEPTIBLE	0.5	0.25
SMRU739	ERR051549	NON-SUSCEPTIBLE	0.5	0.5
SMRU740	ERR051550	NON-SUSCEPTIBLE	0.25	0.125
SMRU741	ERR051551	SUSCEPTIBLE	<0.06	<0.5
SMRU742	ERR051552	NON-SUSCEPTIBLE	0.25	0.125
SMRU743	ERR051553	NON-SUSCEPTIBLE	0.5	0.5
SMRU744	ERR051554	SUSCEPTIBLE	<0.06	<0.5
SMRU745	ERR052602	NON-SUSCEPTIBLE	0.064	0.032
SMRU746	ERR052603	SUSCEPTIBLE	<0.06	<0.5
SMRU747	ERR052604	NON-SUSCEPTIBLE	0.125	0.064
SMRU748	ERR052605	NON-SUSCEPTIBLE	0.125	0.064
SMRU749	ERR052606	SUSCEPTIBLE	<0.06	<0.5
SMRU750	ERR052607	NON-SUSCEPTIBLE	0.125	0.125
SMRU751	ERR052608	SUSCEPTIBLE	<0.06	<0.5
SMRU752	ERR052609	SUSCEPTIBLE	<0.06	<0.5
SMRU753	ERR052610	NON-SUSCEPTIBLE	1	1
SMRU754	ERR052611	NON-SUSCEPTIBLE	0.125	0.25
SMRU755	ERR052612	NON-SUSCEPTIBLE	0.5	0.25
SMRU756	ERR052613	NON-SUSCEPTIBLE	1	0.5
SMRU757	ERR052614	NON-SUSCEPTIBLE	1	0.5
SMRU758	ERR052615	NON-SUSCEPTIBLE	0.125	0.064
SMRU759	ERR052616	SUSCEPTIBLE	<0.06	<0.5
SMRU760	ERR052617	NON-SUSCEPTIBLE	1	0.5
SMRU761	ERR052618	SUSCEPTIBLE	<0.06	<0.5
SMRU762	ERR052619	NON-SUSCEPTIBLE	1	0.5
SMRU763	ERR052620	NON-SUSCEPTIBLE	0.064	0.064
SMRU764	ERR052621	SUSCEPTIBLE	<0.06	<0.5
SMRU765	ERR052622	NON-SUSCEPTIBLE	1	0.5
SMRU767	ERR052624	SUSCEPTIBLE	<0.06	<0.5
SMRU768	ERR052625	SUSCEPTIBLE	<0.06	<0.5
SMRU769	ERR054509	SUSCEPTIBLE	<0.06	<0.5
SMRU770	ERR054510	NON-SUSCEPTIBLE	1	1
SMRU771	ERR054511	NON-SUSCEPTIBLE	0.064	0.064
SMRU772	ERR054512	NON-SUSCEPTIBLE	0.5	0.5
SMRU773	ERR054513	SUSCEPTIBLE	<0.06	<0.5
SMRU774	ERR054514	SUSCEPTIBLE	<0.06	<0.5
SMRU775	ERR054515	SUSCEPTIBLE	<0.06	<0.5
SMRU776	ERR054516	SUSCEPTIBLE	<0.06	<0.5
SMRU777	ERR054517	SUSCEPTIBLE	<0.06	<0.5
SMRU778	ERR054518	NON-SUSCEPTIBLE	0.125	0.064
SMRU779	ERR054519	SUSCEPTIBLE	<0.06	<0.5
SMRU780	ERR054520	SUSCEPTIBLE	<0.06	<0.5
SMRU781	ERR054521	SUSCEPTIBLE	<0.06	<0.5
SMRU782	ERR054522	NON-SUSCEPTIBLE	0.064	0.125
SMRU783	ERR054523	SUSCEPTIBLE	<0.06	<0.5
SMRU784	ERR054524	NON-SUSCEPTIBLE	1	0.25
SMRU785	ERR054525	NON-SUSCEPTIBLE	0.064	0.032
SMRU786	ERR054526	NON-SUSCEPTIBLE	0.125	0.064
SMRU787	ERR054527	SUSCEPTIBLE	<0.06	<0.5
SMRU788	ERR054528	NON-SUSCEPTIBLE	1	0.5
SMRU790	ERR054530	NON-SUSCEPTIBLE	1	0.5
SMRU791	ERR054531	SUSCEPTIBLE	<0.06	<0.5
SMRU792	ERR054532	NON-SUSCEPTIBLE	0.5	0.25
SMRU793	ERR054533	SUSCEPTIBLE	<0.06	<0.5
SMRU794	ERR054534	NON-SUSCEPTIBLE	0.25	0.125
SMRU795	ERR054535	SUSCEPTIBLE	<0.06	<0.5
SMRU796	ERR054536	SUSCEPTIBLE	<0.06	<0.5
SMRU797	ERR054537	NON-SUSCEPTIBLE	0.5	0.5
SMRU798	ERR054538	SUSCEPTIBLE	<0.06	<0.5
SMRU799	ERR054539	SUSCEPTIBLE	<0.06	<0.5
SMRU800	ERR054540	SUSCEPTIBLE	<0.06	<0.5
SMRU801	ERR054541	SUSCEPTIBLE	<0.06	<0.5
SMRU802	ERR054542	SUSCEPTIBLE	<0.06	<0.5
SMRU803	ERR054543	NON-SUSCEPTIBLE	1	0.5
SMRU804	ERR054544	SUSCEPTIBLE	<0.06	<0.5
SMRU805	ERR054545	NON-SUSCEPTIBLE	0.5	0.25
SMRU806	ERR054546	SUSCEPTIBLE	<0.06	<0.5
SMRU807	ERR054547	NON-SUSCEPTIBLE	0.5	0.25
SMRU808	ERR054548	SUSCEPTIBLE	<0.06	<0.5
SMRU809	ERR054549	NON-SUSCEPTIBLE	0.064	0.125
SMRU810	ERR054550	SUSCEPTIBLE	<0.06	<0.5
SMRU811	ERR054551	SUSCEPTIBLE	0.032	0.016
SMRU812	ERR054552	SUSCEPTIBLE	<0.06	<0.5
SMRU813	ERR054553	SUSCEPTIBLE	<0.06	<0.5
SMRU814	ERR054554	SUSCEPTIBLE	<0.06	<0.5
SMRU815	ERR054555	SUSCEPTIBLE	<0.06	<0.5
SMRU816	ERR054556	NON-SUSCEPTIBLE	1	0.5
SMRU817	ERR056683	NON-SUSCEPTIBLE	0.5	0.25
SMRU818	ERR056684	NON-SUSCEPTIBLE	0.25	0.25
SMRU819	ERR056685	NON-SUSCEPTIBLE	1	0.5
SMRU820	ERR056686	NON-SUSCEPTIBLE	0.5	0.25
SMRU821	ERR056687	NON-SUSCEPTIBLE	0.5	0.5
SMRU822	ERR056688	SUSCEPTIBLE	<0.06	<0.5
SMRU823	ERR056689	NON-SUSCEPTIBLE	0.5	0.25
SMRU824	ERR056690	NON-SUSCEPTIBLE	0.5	0.25
SMRU825	ERR056691	NON-SUSCEPTIBLE	0.064	0.125
SMRU826	ERR056692	NON-SUSCEPTIBLE	0.5	0.5
SMRU827	ERR056693	SUSCEPTIBLE	<0.06	<0.5
SMRU828	ERR056694	NON-SUSCEPTIBLE	0.25	0.125
SMRU829	ERR056695	NON-SUSCEPTIBLE	1	0.5
SMRU830	ERR056696	NON-SUSCEPTIBLE	1	0.5
SMRU831	ERR056697	NON-SUSCEPTIBLE	0.064	0.125
SMRU832	ERR056698	SUSCEPTIBLE	<0.06	<0.5
SMRU833	ERR056699	SUSCEPTIBLE	<0.06	<0.5
SMRU834	ERR056700	SUSCEPTIBLE	<0.06	<0.5
SMRU835	ERR056701	SUSCEPTIBLE	<0.06	<0.5
SMRU836	ERR056702	NON-SUSCEPTIBLE	0.064	0.064
SMRU837	ERR056703	NON-SUSCEPTIBLE	0.25	0.125
SMRU838	ERR056704	NON-SUSCEPTIBLE	0.5	1
SMRU839	ERR056705	NON-SUSCEPTIBLE	0.5	0.5
SMRU840	ERR056706	NON-SUSCEPTIBLE	0.064	0.064
SMRU841	ERR056707	SUSCEPTIBLE	0.032	0.064
SMRU842	ERR056708	SUSCEPTIBLE	0.032	0.064
SMRU843	ERR056709	NON-SUSCEPTIBLE	0.25	0.25
SMRU844	ERR056710	NON-SUSCEPTIBLE	1	0.5
SMRU845	ERR056711	NON-SUSCEPTIBLE	0.5	0.25
SMRU846	ERR056712	SUSCEPTIBLE	0.032	0.016
SMRU847	ERR056713	SUSCEPTIBLE	<0.06	<0.5
SMRU848	ERR056714	NON-SUSCEPTIBLE	0.125	0.125
SMRU849	ERR056715	SUSCEPTIBLE	<0.06	<0.5
SMRU850	ERR056716	NON-SUSCEPTIBLE	0.125	0.125
SMRU851	ERR056717	NON-SUSCEPTIBLE	0.5	0.25
SMRU852	ERR056718	NON-SUSCEPTIBLE	1	0.5
SMRU853	ERR056719	NON-SUSCEPTIBLE	0.5	0.5
SMRU854	ERR056720	NON-SUSCEPTIBLE	0.5	0.5
SMRU855	ERR056721	NON-SUSCEPTIBLE	1	0.5
SMRU856	ERR056722	NON-SUSCEPTIBLE	0.5	0.5
SMRU857	ERR056723	NON-SUSCEPTIBLE	1	0.5
SMRU858	ERR056724	NON-SUSCEPTIBLE	1	0.25
SMRU859	ERR056725	NON-SUSCEPTIBLE	0.5	0.5
SMRU860	ERR056726	NON-SUSCEPTIBLE	0.125	0.125
SMRU861	ERR056727	NON-SUSCEPTIBLE	0.064	0.125
SMRU862	ERR056728	SUSCEPTIBLE	<0.06	<0.5
SMRU863	ERR056729	NON-SUSCEPTIBLE	0.5	0.5
SMRU864	ERR056730	NON-SUSCEPTIBLE	1	0.5
SMRU865	ERR054557	SUSCEPTIBLE	<0.06	<0.5
SMRU866	ERR054558	NON-SUSCEPTIBLE	0.5	0.25
SMRU867	ERR054559	NON-SUSCEPTIBLE	0.064	0.016
SMRU868	ERR054560	NON-SUSCEPTIBLE	0.5	0.25
SMRU869	ERR054561	SUSCEPTIBLE	<0.06	<0.5
SMRU871	ERR054563	SUSCEPTIBLE	<0.06	<0.5
SMRU872	ERR054564	NON-SUSCEPTIBLE	2	1
SMRU873	ERR054565	NON-SUSCEPTIBLE	1	0.5
SMRU874	ERR054566	SUSCEPTIBLE	<0.06	<0.5
SMRU875	ERR054567	NON-SUSCEPTIBLE	1	0.5
SMRU876	ERR054568	SUSCEPTIBLE	<0.06	<0.5
SMRU877	ERR054569	NON-SUSCEPTIBLE	0.5	0.25
SMRU878	ERR054570	NON-SUSCEPTIBLE	0.5	0.5
SMRU879	ERR054571	SUSCEPTIBLE	<0.06	<0.5
SMRU880	ERR054572	NON-SUSCEPTIBLE	1	0.5
SMRU881	ERR054573	NON-SUSCEPTIBLE	1	0.5
SMRU882	ERR054574	SUSCEPTIBLE	<0.06	<0.5
SMRU883	ERR054575	NON-SUSCEPTIBLE	1	1
SMRU884	ERR054576	NON-SUSCEPTIBLE	0.5	0.25
SMRU886	ERR054578	NON-SUSCEPTIBLE	0.5	0.5
SMRU887	ERR054579	NON-SUSCEPTIBLE	2	1
SMRU888	ERR054580	NON-SUSCEPTIBLE	0.5	0.25
SMRU889	ERR049960	NON-SUSCEPTIBLE	1	0.5
SMRU890	ERR049961	NON-SUSCEPTIBLE	0.5	0.25
SMRU891	ERR049962	NON-SUSCEPTIBLE	1	0.5
SMRU892	ERR049963	NON-SUSCEPTIBLE	0.5	0.25
SMRU893	ERR049964	NON-SUSCEPTIBLE	1	0.5
SMRU894	ERR049965	SUSCEPTIBLE	<0.06	<0.5
SMRU895	ERR049966	NON-SUSCEPTIBLE	2	1
SMRU896	ERR049967	SUSCEPTIBLE	<0.06	<0.5
SMRU897	ERR049968	SUSCEPTIBLE	<0.06	<0.5
SMRU898	ERR049969	SUSCEPTIBLE	<0.06	<0.5
SMRU899	ERR049970	NON-SUSCEPTIBLE	0.125	0.125
SMRU900	ERR049971	NON-SUSCEPTIBLE	0.064	0.064
SMRU901	ERR049972	NON-SUSCEPTIBLE	0.064	0.064
SMRU902	ERR049973	NON-SUSCEPTIBLE	0.125	0.25
SMRU903	ERR049974	NON-SUSCEPTIBLE	1	0.5
SMRU904	ERR049975	NON-SUSCEPTIBLE	0.5	0.5
SMRU905	ERR049976	SUSCEPTIBLE	<0.06	<0.5
SMRU906	ERR049977	NON-SUSCEPTIBLE	0.064	0.064
SMRU907	ERR049978	SUSCEPTIBLE	<0.06	<0.5
SMRU908	ERR049979	NON-SUSCEPTIBLE	1	0.5
SMRU909	ERR049980	NON-SUSCEPTIBLE	1	0.5
SMRU910	ERR049981	NON-SUSCEPTIBLE	1	1
SMRU911	ERR049982	NON-SUSCEPTIBLE	1	0.5
SMRU912	ERR049983	NON-SUSCEPTIBLE	1	0.5
SMRU913	ERR049984	NON-SUSCEPTIBLE	1	0.25
SMRU914	ERR049985	SUSCEPTIBLE	0.032	0.064
SMRU915	ERR049986	SUSCEPTIBLE	<0.06	<0.5
SMRU916	ERR049987	NON-SUSCEPTIBLE	0.064	0.125
SMRU917	ERR049988	SUSCEPTIBLE	<0.06	<0.5
SMRU918	ERR049989	NON-SUSCEPTIBLE	0.125	0.125
SMRU919	ERR049990	NON-SUSCEPTIBLE	1	0.25
SMRU920	ERR049991	NON-SUSCEPTIBLE	0.5	0.25
SMRU921	ERR049992	NON-SUSCEPTIBLE	0.125	0.064
SMRU922	ERR049993	SUSCEPTIBLE	<0.06	<0.5
SMRU923	ERR049994	NON-SUSCEPTIBLE	1	0.5
SMRU924	ERR049995	NON-SUSCEPTIBLE	0.125	0.064
SMRU925	ERR049996	NON-SUSCEPTIBLE	0.5	0.5
SMRU926	ERR049997	SUSCEPTIBLE	0.032	0.032
SMRU927	ERR049998	NON-SUSCEPTIBLE	1	0.5
SMRU928	ERR049999	SUSCEPTIBLE	<0.06	<0.5
SMRU929	ERR050000	NON-SUSCEPTIBLE	1	0.5
SMRU930	ERR050001	NON-SUSCEPTIBLE	1	0.5
SMRU931	ERR050002	NON-SUSCEPTIBLE	0.5	0.25
SMRU932	ERR050003	SUSCEPTIBLE	0.032	0.064
SMRU933	ERR050004	SUSCEPTIBLE	<0.06	<0.5
SMRU934	ERR050005	NON-SUSCEPTIBLE	1	0.5
SMRU935	ERR050006	NON-SUSCEPTIBLE	0.125	0.25
SMRU936	ERR050007	NON-SUSCEPTIBLE	1	1
SMRU938	ERR050009	SUSCEPTIBLE	<0.06	<0.5
SMRU939	ERR050010	NON-SUSCEPTIBLE	0.125	0.125
SMRU940	ERR050011	SUSCEPTIBLE	<0.06	<0.5
SMRU941	ERR050012	NON-SUSCEPTIBLE	0.5	0.25
SMRU942	ERR050013	NON-SUSCEPTIBLE	0.5	0.25
SMRU943	ERR050014	NON-SUSCEPTIBLE	0.25	0.25
SMRU944	ERR050015	NON-SUSCEPTIBLE	0.5	0.25
SMRU945	ERR050016	SUSCEPTIBLE	0.032	0.064
SMRU946	ERR050017	NON-SUSCEPTIBLE	0.25	0.25
SMRU947	ERR050018	NON-SUSCEPTIBLE	1	1
SMRU948	ERR050019	SUSCEPTIBLE	<0.06	<0.5
SMRU949	ERR050020	NON-SUSCEPTIBLE	1	0.5
SMRU950	ERR050021	SUSCEPTIBLE	<0.06	<0.5
SMRU951	ERR050022	SUSCEPTIBLE	<0.06	<0.5
SMRU952	ERR050023	NON-SUSCEPTIBLE	0.5	0.25
SMRU953	ERR050024	NON-SUSCEPTIBLE	1	0.5
SMRU954	ERR050025	SUSCEPTIBLE	<0.06	<0.5
SMRU955	ERR050026	SUSCEPTIBLE	<0.06	<0.5
SMRU956	ERR050027	NON-SUSCEPTIBLE	0.125	0.25
SMRU957	ERR050028	NON-SUSCEPTIBLE	0.5	1
SMRU958	ERR050029	NON-SUSCEPTIBLE	0.5	0.25
SMRU959	ERR050030	SUSCEPTIBLE	<0.06	<0.5
SMRU960	ERR050031	NON-SUSCEPTIBLE	0.5	0.25
SMRU961	ERR050032	NON-SUSCEPTIBLE	1	0.5
SMRU962	ERR050033	NON-SUSCEPTIBLE	1	1
SMRU963	ERR050034	NON-SUSCEPTIBLE	0.125	0.064
SMRU964	ERR050035	NON-SUSCEPTIBLE	0.125	0.125
SMRU965	ERR050036	SUSCEPTIBLE	<0.06	<0.5
SMRU966	ERR050037	NON-SUSCEPTIBLE	0.125	0.064
SMRU967	ERR050038	NON-SUSCEPTIBLE	0.5	0.5
SMRU969	ERR050040	NON-SUSCEPTIBLE	0.5	0.5
SMRU970	ERR050041	NON-SUSCEPTIBLE	1	0.5
SMRU971	ERR050042	SUSCEPTIBLE	<0.06	<0.5
SMRU972	ERR050043	SUSCEPTIBLE	<0.06	<0.5
SMRU973	ERR050044	SUSCEPTIBLE	<0.06	<0.5
SMRU974	ERR050045	NON-SUSCEPTIBLE	1	0.5
SMRU975	ERR050046	NON-SUSCEPTIBLE	0.5	0.5
SMRU976	ERR050047	SUSCEPTIBLE	<0.06	<0.5
SMRU977	ERR050048	NON-SUSCEPTIBLE	1	0.5
SMRU978	ERR050049	NON-SUSCEPTIBLE	1	1
SMRU979	ERR050050	NON-SUSCEPTIBLE	0.125	0.032
SMRU980	ERR050051	SUSCEPTIBLE	<0.06	<0.5
SMRU981	ERR050052	NON-SUSCEPTIBLE	0.5	0.5
SMRU982	ERR050053	NON-SUSCEPTIBLE	1	0.5
SMRU983	ERR050054	SUSCEPTIBLE	<0.06	<0.5
SMRU984	ERR050055	NON-SUSCEPTIBLE	1	0.5
SMRU985	ERR051555	NON-SUSCEPTIBLE	1	0.5
SMRU986	ERR051556	NON-SUSCEPTIBLE	1	1
SMRU987	ERR051557	SUSCEPTIBLE	<0.06	<0.5
SMRU988	ERR051558	NON-SUSCEPTIBLE	0.5	0.25
SMRU989	ERR051559	SUSCEPTIBLE	<0.06	<0.5
SMRU990	ERR051560	SUSCEPTIBLE	0.032	0.125
SMRU991	ERR051561	SUSCEPTIBLE	<0.06	<0.5
SMRU992	ERR051562	NON-SUSCEPTIBLE	1	1
SMRU993	ERR051563	NON-SUSCEPTIBLE	1	1
SMRU994	ERR051564	NON-SUSCEPTIBLE	1	0.5
SMRU995	ERR051565	NON-SUSCEPTIBLE	0.125	0.125
SMRU996	ERR051566	NON-SUSCEPTIBLE	0.5	0.25
SMRU998	ERR051568	NON-SUSCEPTIBLE	0.125	0.064
SMRU999	ERR051569	NON-SUSCEPTIBLE	0.5	0.5
SMRU1001	ERR051571	SUSCEPTIBLE	<0.06	<0.5
SMRU1002	ERR051572	SUSCEPTIBLE	<0.06	<0.5
SMRU1003	ERR051573	SUSCEPTIBLE	<0.06	<0.5
SMRU1004	ERR051574	SUSCEPTIBLE	<0.06	<0.5
SMRU1006	ERR051576	SUSCEPTIBLE	<0.06	<0.5
SMRU1007	ERR051577	NON-SUSCEPTIBLE	0.5	0.5
SMRU1008	ERR051578	SUSCEPTIBLE	<0.06	<0.5
SMRU1009	ERR273528	SUSCEPTIBLE	<0.06	<0.5
SMRU1010	ERR273529	NON-SUSCEPTIBLE	0.125	0.125
SMRU1011	ERR273530	SUSCEPTIBLE	<0.06	<0.5
SMRU1012	ERR273531	SUSCEPTIBLE	<0.06	<0.5
SMRU1013	ERR273532	SUSCEPTIBLE	<0.06	<0.5
SMRU1014	ERR273533	SUSCEPTIBLE	<0.06	<0.5
SMRU1015	ERR273534	NON-SUSCEPTIBLE	1	1
SMRU1016	ERR273535	SUSCEPTIBLE	<0.06	<0.5
SMRU1017	ERR273536	NON-SUSCEPTIBLE	1	0.5
SMRU1018	ERR273537	NON-SUSCEPTIBLE	0.5	0.5
SMRU1020	ERR273539	NON-SUSCEPTIBLE	0.5	0.25
SMRU1021	ERR273540	NON-SUSCEPTIBLE	0.25	0.25
SMRU1022	ERR273541	NON-SUSCEPTIBLE	0.5	0.5
SMRU1023	ERR273542	SUSCEPTIBLE	<0.06	<0.5
SMRU1024	ERR273543	NON-SUSCEPTIBLE	0.064	0.064
SMRU1025	ERR273544	NON-SUSCEPTIBLE	0.5	0.25
SMRU1026	ERR273545	NON-SUSCEPTIBLE	0.064	0.064
SMRU1027	ERR273546	NON-SUSCEPTIBLE	0.25	0.25
SMRU1028	ERR273547	NON-SUSCEPTIBLE	0.064	0.064
SMRU1029	ERR273548	NON-SUSCEPTIBLE	0.5	0.25
SMRU1030	ERR273549	SUSCEPTIBLE	<0.06	<0.5
SMRU1031	ERR273550	SUSCEPTIBLE	<0.06	<0.5
SMRU1032	ERR273551	NON-SUSCEPTIBLE	1	0.5
SMRU1033	ERR051579	SUSCEPTIBLE	<0.06	<0.5
SMRU1034	ERR051580	SUSCEPTIBLE	<0.06	<0.5
SMRU1035	ERR051581	NON-SUSCEPTIBLE	1	0.5
SMRU1036	ERR051582	SUSCEPTIBLE	<0.06	<0.5
SMRU1037	ERR051583	NON-SUSCEPTIBLE	0.5	0.25
SMRU1038	ERR051584	NON-SUSCEPTIBLE	1	0.5
SMRU1039	ERR051585	NON-SUSCEPTIBLE	1	0.5
SMRU1040	ERR051586	SUSCEPTIBLE	<0.06	<0.5
SMRU1041	ERR051587	SUSCEPTIBLE	<0.06	<0.5
SMRU1042	ERR051588	SUSCEPTIBLE	<0.06	<0.5
SMRU1043	ERR051589	NON-SUSCEPTIBLE	0.5	0.25
SMRU1044	ERR051590	NON-SUSCEPTIBLE	0.5	0.25
SMRU1045	ERR051591	SUSCEPTIBLE	<0.06	<0.5
SMRU1046	ERR051592	NON-SUSCEPTIBLE	2	1
SMRU1047	ERR051593	SUSCEPTIBLE	<0.06	<0.5
SMRU1048	ERR051594	NON-SUSCEPTIBLE	0.125	0.125
SMRU1049	ERR051595	SUSCEPTIBLE	<0.06	<0.5
SMRU1050	ERR051596	SUSCEPTIBLE	<0.06	<0.5
SMRU1051	ERR051597	NON-SUSCEPTIBLE	1	1
SMRU1052	ERR051598	SUSCEPTIBLE	<0.06	<0.5
SMRU1053	ERR051599	SUSCEPTIBLE	<0.06	<0.5
SMRU1054	ERR051600	NON-SUSCEPTIBLE	0.064	0.064
SMRU1055	ERR051601	SUSCEPTIBLE	<0.06	<0.5
SMRU1056	ERR051602	NON-SUSCEPTIBLE	0.5	0.5
SMRU1057	ERR051603	SUSCEPTIBLE	<0.06	<0.5
SMRU1058	ERR051604	NON-SUSCEPTIBLE	0.064	0.064
SMRU1059	ERR051605	SUSCEPTIBLE	<0.06	<0.5
SMRU1060	ERR051606	NON-SUSCEPTIBLE	0.5	0.5
SMRU1061	ERR051607	NON-SUSCEPTIBLE	1	1
SMRU1062	ERR051608	SUSCEPTIBLE	<0.06	<0.5
SMRU1063	ERR051609	SUSCEPTIBLE	<0.06	<0.5
SMRU1064	ERR051610	NON-SUSCEPTIBLE	1	1
SMRU1065	ERR051611	NON-SUSCEPTIBLE	1	1
SMRU1066	ERR051612	SUSCEPTIBLE	<0.06	<0.5
SMRU1067	ERR051613	NON-SUSCEPTIBLE	0.5	0.5
SMRU1068	ERR051614	SUSCEPTIBLE	<0.06	<0.5
SMRU1069	ERR051615	SUSCEPTIBLE	<0.06	<0.5
SMRU1070	ERR051616	SUSCEPTIBLE	<0.06	<0.5
SMRU1071	ERR051617	NON-SUSCEPTIBLE	1	0.5
SMRU1072	ERR051618	NON-SUSCEPTIBLE	0.5	0.25
SMRU1073	ERR051619	SUSCEPTIBLE	<0.06	<0.5
SMRU1074	ERR051620	NON-SUSCEPTIBLE	0.5	0.5
SMRU1075	ERR051621	NON-SUSCEPTIBLE	1	0.25
SMRU1076	ERR051622	NON-SUSCEPTIBLE	0.125	0.125
SMRU1077	ERR051623	NON-SUSCEPTIBLE	1	0.5
SMRU1078	ERR051624	NON-SUSCEPTIBLE	1	0.5
SMRU1079	ERR051625	NON-SUSCEPTIBLE	0.125	0.25
SMRU1080	ERR051626	NON-SUSCEPTIBLE	0.5	0.5
SMRU1081	ERR051627	SUSCEPTIBLE	<0.06	<0.5
SMRU1082	ERR051628	SUSCEPTIBLE	<0.06	<0.5
SMRU1083	ERR051629	NON-SUSCEPTIBLE	0.5	0.5
SMRU1084	ERR051630	NON-SUSCEPTIBLE	0.25	0.5
SMRU1085	ERR051631	SUSCEPTIBLE	<0.06	<0.5
SMRU1086	ERR051632	SUSCEPTIBLE	<0.06	<0.5
SMRU1087	ERR051633	NON-SUSCEPTIBLE	0.125	0.125
SMRU1088	ERR051634	NON-SUSCEPTIBLE	0.25	0.125
SMRU1089	ERR051635	NON-SUSCEPTIBLE	1	1
SMRU1090	ERR051636	SUSCEPTIBLE	<0.06	<0.5
SMRU1091	ERR051637	SUSCEPTIBLE	<0.06	<0.5
SMRU1092	ERR051638	SUSCEPTIBLE	<0.06	<0.5
SMRU1093	ERR051639	SUSCEPTIBLE	<0.06	<0.5
SMRU1094	ERR051640	SUSCEPTIBLE	<0.06	<0.5
SMRU1095	ERR051641	NON-SUSCEPTIBLE	0.5	0.5
SMRU1096	ERR051642	SUSCEPTIBLE	<0.06	<0.5
SMRU1097	ERR051643	NON-SUSCEPTIBLE	0.5	0.25
SMRU1098	ERR051644	SUSCEPTIBLE	0.032	0.064
SMRU1099	ERR051645	SUSCEPTIBLE	<0.06	<0.5
SMRU1100	ERR051646	SUSCEPTIBLE	<0.06	<0.5
SMRU1101	ERR051647	NON-SUSCEPTIBLE	1	0.5
SMRU1102	ERR051648	NON-SUSCEPTIBLE	0.064	0.064
SMRU1103	ERR051649	SUSCEPTIBLE	<0.06	<0.5
SMRU1104	ERR051650	NON-SUSCEPTIBLE	1	1
SMRU1105	ERR051651	SUSCEPTIBLE	<0.06	<0.5
SMRU1106	ERR051652	NON-SUSCEPTIBLE	0.125	0.064
SMRU1107	ERR051653	NON-SUSCEPTIBLE	0.125	0.125
SMRU1108	ERR051654	SUSCEPTIBLE	<0.06	<0.5
SMRU1109	ERR051655	SUSCEPTIBLE	<0.06	<0.5
SMRU1110	ERR051656	SUSCEPTIBLE	<0.06	<0.5
SMRU1111	ERR051657	NON-SUSCEPTIBLE	2	1
SMRU1112	ERR051658	SUSCEPTIBLE	0.016	0.032
SMRU1113	ERR051659	SUSCEPTIBLE	<0.06	<0.5
SMRU1114	ERR051660	NON-SUSCEPTIBLE	1	0.5
SMRU1115	ERR051661	SUSCEPTIBLE	<0.06	<0.5
SMRU1116	ERR051662	NON-SUSCEPTIBLE	0.5	0.25
SMRU1117	ERR051663	NON-SUSCEPTIBLE	0.125	0.25
SMRU1118	ERR051664	SUSCEPTIBLE	<0.06	<0.5
SMRU1119	ERR051665	NON-SUSCEPTIBLE	0.5	0.5
SMRU1120	ERR051666	NON-SUSCEPTIBLE	0.125	0.064
SMRU1121	ERR051667	SUSCEPTIBLE	<0.06	<0.5
SMRU1122	ERR051668	SUSCEPTIBLE	<0.06	<0.5
SMRU1123	ERR051669	NON-SUSCEPTIBLE	1	0.5
SMRU1124	ERR051670	SUSCEPTIBLE	<0.06	<0.5
SMRU1125	ERR051671	NON-SUSCEPTIBLE	0.125	0.125
SMRU1126	ERR051672	SUSCEPTIBLE	<0.06	<0.5
SMRU1127	ERR051673	SUSCEPTIBLE	<0.06	<0.5
SMRU1128	ERR051674	SUSCEPTIBLE	<0.06	<0.5
SMRU1129	ERR054581	SUSCEPTIBLE	0.032	0.064
SMRU1130	ERR054582	NON-SUSCEPTIBLE	0.25	0.25
SMRU1131	ERR054583	SUSCEPTIBLE	<0.06	<0.5
SMRU1132	ERR054584	NON-SUSCEPTIBLE	1	1
SMRU1133	ERR054585	NON-SUSCEPTIBLE	0.064	0.064
SMRU1134	ERR054586	SUSCEPTIBLE	<0.06	<0.5
SMRU1135	ERR054587	NON-SUSCEPTIBLE	0.125	0.125
SMRU1136	ERR054588	NON-SUSCEPTIBLE	1	0.5
SMRU1137	ERR054589	SUSCEPTIBLE	<0.06	<0.5
SMRU1138	ERR054590	NON-SUSCEPTIBLE	0.064	0.064
SMRU1139	ERR054591	NON-SUSCEPTIBLE	0.5	0.25
SMRU1140	ERR054592	SUSCEPTIBLE	<0.06	<0.5
SMRU1141	ERR054593	SUSCEPTIBLE	<0.06	<0.5
SMRU1143	ERR054595	SUSCEPTIBLE	<0.06	<0.5
SMRU1144	ERR054596	NON-SUSCEPTIBLE	0.5	0.25
SMRU1145	ERR054597	SUSCEPTIBLE	<0.06	<0.5
SMRU1146	ERR054598	NON-SUSCEPTIBLE	1	1
SMRU1147	ERR054599	NON-SUSCEPTIBLE	0.5	0.25
SMRU1149	ERR054601	NON-SUSCEPTIBLE	0.5	0.25
SMRU1150	ERR054602	NON-SUSCEPTIBLE	0.5	0.5
SMRU1151	ERR054603	NON-SUSCEPTIBLE	1	0.5
SMRU1152	ERR054604	NON-SUSCEPTIBLE	0.064	0.064
SMRU1153	ERR054605	NON-SUSCEPTIBLE	1	1
SMRU1154	ERR054606	SUSCEPTIBLE	<0.06	<0.5
SMRU1155	ERR054607	NON-SUSCEPTIBLE	1	0.5
SMRU1156	ERR054608	SUSCEPTIBLE	<0.06	<0.5
SMRU1157	ERR054609	SUSCEPTIBLE	<0.06	<0.5
SMRU1158	ERR054610	SUSCEPTIBLE	<0.06	<0.5
SMRU1159	ERR054611	SUSCEPTIBLE	<0.06	<0.5
SMRU1160	ERR054612	SUSCEPTIBLE	<0.06	<0.5
SMRU1161	ERR054613	NON-SUSCEPTIBLE	0.064	0.064
SMRU1162	ERR054614	NON-SUSCEPTIBLE	0.5	0.25
SMRU1163	ERR054615	SUSCEPTIBLE	<0.06	<0.5
SMRU1164	ERR054616	SUSCEPTIBLE	<0.06	<0.5
SMRU1165	ERR054617	SUSCEPTIBLE	<0.06	<0.5
SMRU1166	ERR054618	NON-SUSCEPTIBLE	0.25	0.125
SMRU1167	ERR054619	SUSCEPTIBLE	0.032	0.032
SMRU1168	ERR054620	NON-SUSCEPTIBLE	0.25	0.25
SMRU1169	ERR054621	NON-SUSCEPTIBLE	0.064	0.125
SMRU1170	ERR054622	SUSCEPTIBLE	<0.06	<0.5
SMRU1171	ERR054623	SUSCEPTIBLE	<0.06	<0.5
SMRU1172	ERR054624	SUSCEPTIBLE	<0.06	<0.5
SMRU1173	ERR054625	SUSCEPTIBLE	0.032	0.064
SMRU1174	ERR054626	SUSCEPTIBLE	<0.06	<0.5
SMRU1175	ERR054627	SUSCEPTIBLE	<0.06	<0.5
SMRU1176	ERR054628	NON-SUSCEPTIBLE	0.064	0.064
SMRU1177	ERR054629	NON-SUSCEPTIBLE	0.5	0.5
SMRU1178	ERR054630	SUSCEPTIBLE	<0.06	<0.5
SMRU1179	ERR054631	NON-SUSCEPTIBLE	0.25	0.125
SMRU1180	ERR054632	SUSCEPTIBLE	<0.06	<0.5
SMRU1181	ERR054633	NON-SUSCEPTIBLE	0.064	0.125
SMRU1183	ERR054635	SUSCEPTIBLE	<0.06	<0.5
SMRU1184	ERR054636	NON-SUSCEPTIBLE	1	0.5
SMRU1186	ERR054638	NON-SUSCEPTIBLE	0.5	0.25
SMRU1187	ERR054639	SUSCEPTIBLE	<0.06	<0.5
SMRU1188	ERR054640	SUSCEPTIBLE	<0.06	<0.5
SMRU1190	ERR054641	NON-SUSCEPTIBLE	1	0.5
SMRU1191	ERR054642	NON-SUSCEPTIBLE	0.064	0.125
SMRU1192	ERR054643	NON-SUSCEPTIBLE	0.5	0.25
SMRU1193	ERR054644	SUSCEPTIBLE	<0.06	<0.5
SMRU1194	ERR054645	SUSCEPTIBLE	<0.06	<0.5
SMRU1196	ERR054647	NON-SUSCEPTIBLE	1	1
SMRU1197	ERR054648	SUSCEPTIBLE	<0.06	<0.5
SMRU1198	ERR054649	NON-SUSCEPTIBLE	0.5	0.5
SMRU1199	ERR054650	SUSCEPTIBLE	<0.06	<0.5
SMRU1200	ERR054651	SUSCEPTIBLE	<0.06	<0.5
SMRU1201	ERR054294	NON-SUSCEPTIBLE	0.5	0.125
SMRU1202	ERR054295	SUSCEPTIBLE	<0.06	<0.5
SMRU1203	ERR054296	SUSCEPTIBLE	<0.06	<0.5
SMRU1204	ERR054297	SUSCEPTIBLE	<0.06	<0.5
SMRU1205	ERR054298	SUSCEPTIBLE	<0.06	<0.5
SMRU1206	ERR054299	SUSCEPTIBLE	<0.06	<0.5
SMRU1207	ERR054300	SUSCEPTIBLE	<0.06	<0.5
SMRU1208	ERR054301	NON-SUSCEPTIBLE	0.064	0.064
SMRU1209	ERR054302	SUSCEPTIBLE	<0.06	<0.5
SMRU1210	ERR054303	SUSCEPTIBLE	<0.06	<0.5
SMRU1211	ERR054304	SUSCEPTIBLE	0.032	0.032
SMRU1212	ERR054305	SUSCEPTIBLE	0.016	0.032
SMRU1213	ERR054306	SUSCEPTIBLE	<0.06	<0.5
SMRU1214	ERR054307	NON-SUSCEPTIBLE	1	0.5
SMRU1215	ERR054308	NON-SUSCEPTIBLE	0.25	0.25
SMRU1216	ERR054309	NON-SUSCEPTIBLE	1	0.5
SMRU1217	ERR054310	SUSCEPTIBLE	<0.06	<0.5
SMRU1218	ERR054311	NON-SUSCEPTIBLE	0.125	0.064
SMRU1219	ERR054312	SUSCEPTIBLE	<0.06	<0.5
SMRU1220	ERR054313	SUSCEPTIBLE	<0.06	<0.5
SMRU1221	ERR054314	SUSCEPTIBLE	0.032	0.032
SMRU1222	ERR054315	NON-SUSCEPTIBLE	0.064	0.032
SMRU1223	ERR054316	SUSCEPTIBLE	<0.06	<0.5
SMRU1224	ERR054317	SUSCEPTIBLE	<0.06	<0.5
SMRU1225	ERR054318	NON-SUSCEPTIBLE	0.5	0.5
SMRU1226	ERR054319	NON-SUSCEPTIBLE	0.5	0.25
SMRU1227	ERR054320	SUSCEPTIBLE	<0.06	<0.5
SMRU1228	ERR054321	NON-SUSCEPTIBLE	2	1
SMRU1229	ERR054322	SUSCEPTIBLE	<0.06	<0.5
SMRU1230	ERR054323	NON-SUSCEPTIBLE	0.5	0.5
SMRU1231	ERR054324	SUSCEPTIBLE	<0.06	<0.5
SMRU1232	ERR054325	SUSCEPTIBLE	<0.06	<0.5
SMRU1233	ERR054326	SUSCEPTIBLE	<0.06	<0.5
SMRU1234	ERR054327	NON-SUSCEPTIBLE	0.125	0.125
SMRU1235	ERR054328	SUSCEPTIBLE	<0.06	<0.5
SMRU1236	ERR054329	SUSCEPTIBLE	<0.06	<0.5
SMRU1237	ERR054330	SUSCEPTIBLE	<0.06	<0.5
SMRU1239	ERR054332	SUSCEPTIBLE	<0.06	<0.5
SMRU1240	ERR054333	SUSCEPTIBLE	<0.06	<0.5
SMRU1241	ERR054334	SUSCEPTIBLE	<0.06	<0.5
SMRU1243	ERR054336	SUSCEPTIBLE	<0.06	<0.5
SMRU1244	ERR054337	SUSCEPTIBLE	<0.06	<0.5
SMRU1245	ERR054338	SUSCEPTIBLE	<0.06	<0.5
SMRU1246	ERR054339	SUSCEPTIBLE	<0.06	<0.5
SMRU1247	ERR054340	SUSCEPTIBLE	<0.06	<0.5
SMRU1248	ERR054341	SUSCEPTIBLE	<0.06	<0.5
SMRU1249	ERR054342	NON-SUSCEPTIBLE	0.125	0.125
SMRU1250	ERR054343	NON-SUSCEPTIBLE	0.5	0.25
SMRU1251	ERR054344	SUSCEPTIBLE	<0.06	<0.5
SMRU1252	ERR054345	NON-SUSCEPTIBLE	1	0.5
SMRU1253	ERR054346	SUSCEPTIBLE	<0.06	<0.5
SMRU1254	ERR054347	SUSCEPTIBLE	<0.06	<0.5
SMRU1255	ERR054348	SUSCEPTIBLE	0.016	0.064
SMRU1256	ERR054349	SUSCEPTIBLE	<0.06	<0.5
SMRU1257	ERR054350	NON-SUSCEPTIBLE	0.5	0.5
SMRU1258	ERR054351	NON-SUSCEPTIBLE	0.5	0.5
SMRU1259	ERR054352	NON-SUSCEPTIBLE	0.125	0.064
SMRU1260	ERR054353	SUSCEPTIBLE	<0.06	<0.5
SMRU1261	ERR054354	SUSCEPTIBLE	<0.06	<0.5
SMRU1262	ERR054355	NON-SUSCEPTIBLE	1	0.5
SMRU1263	ERR054356	SUSCEPTIBLE	0.016	0.125
SMRU1264	ERR054357	NON-SUSCEPTIBLE	0.5	1
SMRU1265	ERR054358	SUSCEPTIBLE	<0.06	<0.5
SMRU1266	ERR054359	SUSCEPTIBLE	<0.06	<0.5
SMRU1267	ERR054360	NON-SUSCEPTIBLE	0.25	0.25
SMRU1268	ERR054361	SUSCEPTIBLE	<0.06	<0.5
SMRU1269	ERR054362	NON-SUSCEPTIBLE	1	0.5
SMRU1270	ERR054363	NON-SUSCEPTIBLE	1	1
SMRU1271	ERR054364	NON-SUSCEPTIBLE	0.064	0.125
SMRU1272	ERR054365	NON-SUSCEPTIBLE	0.5	0.5
SMRU1273	ERR054366	NON-SUSCEPTIBLE	0.5	0.5
SMRU1274	ERR054367	NON-SUSCEPTIBLE	0.25	0.125
SMRU1275	ERR054368	SUSCEPTIBLE	<0.06	<0.5
SMRU1276	ERR054369	SUSCEPTIBLE	<0.06	<0.5
SMRU1277	ERR054370	NON-SUSCEPTIBLE	0.5	0.25
SMRU1278	ERR054371	NON-SUSCEPTIBLE	0.5	0.5
SMRU1279	ERR054372	NON-SUSCEPTIBLE	0.125	0.125
SMRU1280	ERR054373	SUSCEPTIBLE	0.016	0.032
SMRU1281	ERR054374	NON-SUSCEPTIBLE	0.5	0.5
SMRU1282	ERR054375	NON-SUSCEPTIBLE	0.5	0.5
SMRU1283	ERR054376	SUSCEPTIBLE	0.032	0.064
SMRU1284	ERR054377	NON-SUSCEPTIBLE	0.25	0.5
SMRU1285	ERR054378	NON-SUSCEPTIBLE	0.5	0.5
SMRU1286	ERR054379	SUSCEPTIBLE	<0.06	<0.5
SMRU1287	ERR054380	NON-SUSCEPTIBLE	0.064	0.064
SMRU1288	ERR054381	NON-SUSCEPTIBLE	0.5	0.5
SMRU1289	ERR054382	SUSCEPTIBLE	<0.06	<0.5
SMRU1291	ERR054384	SUSCEPTIBLE	0.016	0.064
SMRU1292	ERR054385	SUSCEPTIBLE	<0.06	<0.5
SMRU1293	ERR054386	SUSCEPTIBLE	<0.06	<0.5
SMRU1294	ERR054387	NON-SUSCEPTIBLE	0.5	0.5
SMRU1295	ERR054388	SUSCEPTIBLE	<0.06	<0.5
SMRU1296	ERR054389	NON-SUSCEPTIBLE	0.5	0.5
SMRU1297	ERR054390	NON-SUSCEPTIBLE	0.125	0.064
SMRU1298	ERR054391	NON-SUSCEPTIBLE	0.25	0.125
SMRU1299	ERR054392	SUSCEPTIBLE	<0.06	<0.5
SMRU1300	ERR054393	SUSCEPTIBLE	<0.06	<0.5
SMRU1301	ERR054394	SUSCEPTIBLE	<0.06	<0.5
SMRU1302	ERR054395	SUSCEPTIBLE	<0.06	<0.5
SMRU1303	ERR054396	NON-SUSCEPTIBLE	0.064	0.064
SMRU1304	ERR054397	NON-SUSCEPTIBLE	1	0.5
SMRU1305	ERR054398	NON-SUSCEPTIBLE	1	0.5
SMRU1306	ERR054399	NON-SUSCEPTIBLE	0.064	0.064
SMRU1307	ERR054400	SUSCEPTIBLE	<0.06	<0.5
SMRU1308	ERR054401	SUSCEPTIBLE	<0.06	<0.5
SMRU1309	ERR054402	SUSCEPTIBLE	0.032	0.032
SMRU1310	ERR054403	NON-SUSCEPTIBLE	1	0.5
SMRU1311	ERR054404	NON-SUSCEPTIBLE	0.125	0.125
SMRU1312	ERR054405	SUSCEPTIBLE	<0.06	<0.5
SMRU1313	ERR054406	SUSCEPTIBLE	<0.06	<0.5
SMRU1314	ERR054407	SUSCEPTIBLE	<0.06	<0.5
SMRU1315	ERR054408	SUSCEPTIBLE	<0.06	<0.5
SMRU1316	ERR054409	SUSCEPTIBLE	<0.06	<0.5
SMRU1317	ERR054410	NON-SUSCEPTIBLE	0.125	0.125
SMRU1318	ERR054411	NON-SUSCEPTIBLE	0.5	0.5
SMRU1319	ERR054412	SUSCEPTIBLE	<0.06	<0.5
SMRU1320	ERR054413	NON-SUSCEPTIBLE	0.125	0.125
SMRU1321	ERR060029	SUSCEPTIBLE	<0.06	<0.5
SMRU1322	ERR060030	SUSCEPTIBLE	<0.06	<0.5
SMRU1323	ERR060031	SUSCEPTIBLE	0.032	0.032
SMRU1324	ERR060032	NON-SUSCEPTIBLE	0.064	0.125
SMRU1325	ERR060033	NON-SUSCEPTIBLE	0.5	0.25
SMRU1326	ERR060034	NON-SUSCEPTIBLE	0.064	0.125
SMRU1327	ERR060035	NON-SUSCEPTIBLE	0.125	0.064
SMRU1328	ERR060036	SUSCEPTIBLE	<0.06	<0.5
SMRU1329	ERR060037	NON-SUSCEPTIBLE	0.125	0.125
SMRU1330	ERR060038	SUSCEPTIBLE	<0.06	<0.5
SMRU1331	ERR060039	SUSCEPTIBLE	<0.06	<0.5
SMRU1332	ERR060040	NON-SUSCEPTIBLE	0.5	0.5
SMRU1333	ERR060041	SUSCEPTIBLE	<0.06	<0.5
SMRU1334	ERR060042	SUSCEPTIBLE	<0.06	<0.5
SMRU1335	ERR060043	NON-SUSCEPTIBLE	0.5	0.5
SMRU1336	ERR060044	SUSCEPTIBLE	<0.06	<0.5
SMRU1337	ERR060045	SUSCEPTIBLE	<0.06	<0.5
SMRU1338	ERR060046	NON-SUSCEPTIBLE	0.25	0.125
SMRU1339	ERR060047	SUSCEPTIBLE	<0.06	<0.5
SMRU1340	ERR060048	NON-SUSCEPTIBLE	0.064	0.064
SMRU1341	ERR060049	NON-SUSCEPTIBLE	2	0.5
SMRU1342	ERR060050	SUSCEPTIBLE	0.016	0.064
SMRU1343	ERR060051	NON-SUSCEPTIBLE	0.064	0.125
SMRU1344	ERR060052	NON-SUSCEPTIBLE	1	0.5
SMRU1345	ERR054222	NON-SUSCEPTIBLE	0.5	0.25
SMRU1346	ERR054223	SUSCEPTIBLE	<0.06	<0.5
SMRU1347	ERR054224	SUSCEPTIBLE	0.032	0.032
SMRU1348	ERR054225	NON-SUSCEPTIBLE	0.5	0.25
SMRU1350	ERR054227	NON-SUSCEPTIBLE	0.064	0.064
SMRU1351	ERR054228	SUSCEPTIBLE	<0.06	<0.5
SMRU1352	ERR054229	SUSCEPTIBLE	<0.06	<0.5
SMRU1353	ERR054230	SUSCEPTIBLE	<0.06	<0.5
SMRU1354	ERR054231	SUSCEPTIBLE	<0.06	<0.5
SMRU1355	ERR054232	NON-SUSCEPTIBLE	0.5	0.5
SMRU1356	ERR054233	NON-SUSCEPTIBLE	0.064	0.064
SMRU1357	ERR054234	NON-SUSCEPTIBLE	0.5	0.5
SMRU1358	ERR054235	NON-SUSCEPTIBLE	0.125	0.125
SMRU1359	ERR054236	SUSCEPTIBLE	<0.06	<0.5
SMRU1360	ERR054237	SUSCEPTIBLE	<0.06	<0.5
SMRU1361	ERR054238	SUSCEPTIBLE	<0.06	<0.5
SMRU1362	ERR054239	NON-SUSCEPTIBLE	0.064	0.125
SMRU1363	ERR054240	SUSCEPTIBLE	<0.06	<0.5
SMRU1364	ERR054241	NON-SUSCEPTIBLE	0.5	0.25
SMRU1365	ERR054242	SUSCEPTIBLE	<0.06	<0.5
SMRU1366	ERR054243	SUSCEPTIBLE	<0.06	<0.5
SMRU1367	ERR054244	NON-SUSCEPTIBLE	0.5	0.25
SMRU1368	ERR054245	NON-SUSCEPTIBLE	0.064	0.064
SMRU1369	ERR054246	NON-SUSCEPTIBLE	0.5	0.5
SMRU1370	ERR054247	SUSCEPTIBLE	<0.06	<0.5
SMRU1372	ERR054249	NON-SUSCEPTIBLE	1	0.5
SMRU1373	ERR054250	SUSCEPTIBLE	<0.06	<0.5
SMRU1374	ERR054251	NON-SUSCEPTIBLE	0.5	0.5
SMRU1375	ERR054252	SUSCEPTIBLE	<0.06	<0.5
SMRU1376	ERR054253	NON-SUSCEPTIBLE	0.5	0.25
SMRU1377	ERR054254	SUSCEPTIBLE	0.016	0.032
SMRU1378	ERR054255	NON-SUSCEPTIBLE	1	0.5
SMRU1379	ERR054256	NON-SUSCEPTIBLE	0.125	0.125
SMRU1380	ERR054257	SUSCEPTIBLE	<0.06	<0.5
SMRU1381	ERR054258	SUSCEPTIBLE	<0.06	<0.5
SMRU1382	ERR054259	SUSCEPTIBLE	<0.06	<0.5
SMRU1383	ERR054260	SUSCEPTIBLE	0.016	0.064
SMRU1384	ERR054261	SUSCEPTIBLE	<0.06	<0.5
SMRU1385	ERR054262	SUSCEPTIBLE	<0.06	<0.5
SMRU1386	ERR054263	SUSCEPTIBLE	<0.06	<0.5
SMRU1387	ERR054264	NON-SUSCEPTIBLE	0.064	0.125
SMRU1388	ERR054265	NON-SUSCEPTIBLE	0.5	0.5
SMRU1389	ERR054266	SUSCEPTIBLE	<0.06	<0.5
SMRU1390	ERR054267	NON-SUSCEPTIBLE	1	0.5
SMRU1391	ERR054268	SUSCEPTIBLE	<0.06	<0.5
SMRU1392	ERR054269	NON-SUSCEPTIBLE	0.5	0.125
SMRU1393	ERR054270	SUSCEPTIBLE	<0.06	<0.5
SMRU1394	ERR054271	NON-SUSCEPTIBLE	0.125	0.064
SMRU1395	ERR054272	SUSCEPTIBLE	<0.06	<0.5
SMRU1397	ERR054274	NON-SUSCEPTIBLE	0.25	0.5
SMRU1398	ERR054275	SUSCEPTIBLE	<0.06	<0.5
SMRU1399	ERR054276	NON-SUSCEPTIBLE	0.125	0.064
SMRU1400	ERR054277	SUSCEPTIBLE	<0.06	<0.5
SMRU1401	ERR054278	NON-SUSCEPTIBLE	0.5	0.5
SMRU1402	ERR054279	SUSCEPTIBLE	<0.06	<0.5
SMRU1403	ERR054280	NON-SUSCEPTIBLE	0.5	0.5
SMRU1404	ERR054281	NON-SUSCEPTIBLE	0.064	0.064
SMRU1405	ERR054282	SUSCEPTIBLE	<0.06	<0.5
SMRU1406	ERR054283	SUSCEPTIBLE	<0.06	<0.5
SMRU1407	ERR054284	NON-SUSCEPTIBLE	0.064	0.064
SMRU1408	ERR054285	NON-SUSCEPTIBLE	0.5	0.5
SMRU1409	ERR054286	NON-SUSCEPTIBLE	0.064	0.125
SMRU1410	ERR054287	SUSCEPTIBLE	<0.06	<0.5
SMRU1411	ERR054288	SUSCEPTIBLE	<0.06	<0.5
SMRU1412	ERR054289	SUSCEPTIBLE	<0.06	<0.5
SMRU1413	ERR054290	NON-SUSCEPTIBLE	0.25	0.125
SMRU1414	ERR054291	NON-SUSCEPTIBLE	0.125	0.064
SMRU1415	ERR054292	SUSCEPTIBLE	<0.06	<0.5
SMRU1416	ERR054293	SUSCEPTIBLE	<0.06	<0.5
SMRU1417	ERR056755	NON-SUSCEPTIBLE	0.125	0.064
SMRU1418	ERR056756	NON-SUSCEPTIBLE	0.5	0.5
SMRU1419	ERR056757	SUSCEPTIBLE	<0.06	<0.5
SMRU1420	ERR056758	SUSCEPTIBLE	<0.06	<0.5
SMRU1421	ERR056759	SUSCEPTIBLE	<0.06	<0.5
SMRU1422	ERR056760	SUSCEPTIBLE	<0.06	<0.5
SMRU1423	ERR056761	NON-SUSCEPTIBLE	0.5	0.5
SMRU1424	ERR056762	SUSCEPTIBLE	<0.06	<0.5
SMRU1425	ERR056763	SUSCEPTIBLE	<0.06	<0.5
SMRU1426	ERR056764	NON-SUSCEPTIBLE	0.25	0.125
SMRU1427	ERR056765	SUSCEPTIBLE	<0.06	<0.5
SMRU1428	ERR056766	NON-SUSCEPTIBLE	0.25	0.064
SMRU1429	ERR056767	NON-SUSCEPTIBLE	0.5	0.25
SMRU1430	ERR056768	SUSCEPTIBLE	<0.06	<0.5
SMRU1431	ERR056769	SUSCEPTIBLE	<0.06	<0.5
SMRU1432	ERR056770	SUSCEPTIBLE	<0.06	<0.5
SMRU1433	ERR056771	NON-SUSCEPTIBLE	0.5	0.25
SMRU1434	ERR056772	SUSCEPTIBLE	<0.06	<0.5
SMRU1435	ERR056773	SUSCEPTIBLE	<0.06	<0.5
SMRU1436	ERR056774	NON-SUSCEPTIBLE	0.5	0.5
SMRU1437	ERR056775	SUSCEPTIBLE	<0.06	<0.5
SMRU1438	ERR056776	SUSCEPTIBLE	<0.06	<0.5
SMRU1439	ERR056777	NON-SUSCEPTIBLE	1	0.5
SMRU1440	ERR056778	SUSCEPTIBLE	<0.06	<0.5
SMRU1441	ERR056779	SUSCEPTIBLE	<0.06	<0.5
SMRU1442	ERR056780	SUSCEPTIBLE	<0.06	<0.5
SMRU1443	ERR056781	SUSCEPTIBLE	<0.06	<0.5
SMRU1444	ERR056782	SUSCEPTIBLE	<0.06	<0.5
SMRU1445	ERR056783	NON-SUSCEPTIBLE	1	0.5
SMRU1446	ERR056784	NON-SUSCEPTIBLE	1	0.5
SMRU1447	ERR056785	SUSCEPTIBLE	<0.06	<0.5
SMRU1448	ERR056786	NON-SUSCEPTIBLE	0.5	0.25
SMRU1449	ERR056787	SUSCEPTIBLE	<0.06	<0.5
SMRU1450	ERR056788	NON-SUSCEPTIBLE	0.5	0.5
SMRU1451	ERR056789	NON-SUSCEPTIBLE	0.5	0.5
SMRU1452	ERR056790	NON-SUSCEPTIBLE	0.25	0.25
SMRU1453	ERR056791	NON-SUSCEPTIBLE	0.5	0.25
SMRU1454	ERR056792	SUSCEPTIBLE	<0.06	<0.5
SMRU1455	ERR056793	SUSCEPTIBLE	<0.06	<0.5
SMRU1456	ERR056794	SUSCEPTIBLE	<0.06	<0.5
SMRU1457	ERR056795	SUSCEPTIBLE	<0.06	<0.5
SMRU1458	ERR056796	NON-SUSCEPTIBLE	0.5	0.25
SMRU1459	ERR056797	NON-SUSCEPTIBLE	0.25	0.125
SMRU1460	ERR056798	NON-SUSCEPTIBLE	0.5	0.25
SMRU1461	ERR056799	SUSCEPTIBLE	<0.06	<0.5
SMRU1462	ERR056800	SUSCEPTIBLE	<0.06	<0.5
SMRU1463	ERR056801	NON-SUSCEPTIBLE	0.5	0.25
SMRU1464	ERR056802	SUSCEPTIBLE	<0.06	<0.5
SMRU1465	ERR054414	SUSCEPTIBLE	<0.06	<0.5
SMRU1466	ERR054415	NON-SUSCEPTIBLE	0.5	0.25
SMRU1467	ERR054416	NON-SUSCEPTIBLE	0.25	0.125
SMRU1468	ERR054417	SUSCEPTIBLE	<0.06	<0.5
SMRU1469	ERR054418	NON-SUSCEPTIBLE	0.5	0.5
SMRU1470	ERR054419	SUSCEPTIBLE	<0.06	<0.5
SMRU1471	ERR054420	SUSCEPTIBLE	<0.06	<0.5
SMRU1472	ERR054421	NON-SUSCEPTIBLE	0.5	0.5
SMRU1473	ERR054422	NON-SUSCEPTIBLE	0.5	0.5
SMRU1474	ERR054423	NON-SUSCEPTIBLE	0.25	0.125
SMRU1475	ERR054424	SUSCEPTIBLE	<0.06	<0.5
SMRU1476	ERR054425	SUSCEPTIBLE	<0.06	<0.5
SMRU1477	ERR054426	SUSCEPTIBLE	<0.06	<0.5
SMRU1478	ERR054427	SUSCEPTIBLE	<0.06	<0.5
SMRU1479	ERR054428	SUSCEPTIBLE	<0.06	<0.5
SMRU1480	ERR054429	SUSCEPTIBLE	<0.06	<0.5
SMRU1481	ERR054430	NON-SUSCEPTIBLE	0.5	0.5
SMRU1482	ERR054431	SUSCEPTIBLE	<0.06	<0.5
SMRU1483	ERR054432	SUSCEPTIBLE	<0.06	<0.5
SMRU1484	ERR054433	NON-SUSCEPTIBLE	0.5	0.25
SMRU1485	ERR054434	SUSCEPTIBLE	<0.06	<0.5
SMRU1486	ERR054435	SUSCEPTIBLE	<0.06	<0.5
SMRU1487	ERR054436	SUSCEPTIBLE	<0.06	<0.5
SMRU1488	ERR054437	NON-SUSCEPTIBLE	0.25	0.25
SMRU1489	ERR054438	SUSCEPTIBLE	<0.06	<0.5
SMRU1490	ERR054439	SUSCEPTIBLE	<0.06	<0.5
SMRU1491	ERR054440	SUSCEPTIBLE	0.032	0.032
SMRU1492	ERR054441	NON-SUSCEPTIBLE	0.5	0.25
SMRU1493	ERR054442	SUSCEPTIBLE	<0.06	<0.5
SMRU1494	ERR054443	NON-SUSCEPTIBLE	1	1
SMRU1496	ERR054444	SUSCEPTIBLE	<0.06	<0.5
SMRU1497	ERR054445	NON-SUSCEPTIBLE	0.5	0.5
SMRU1498	ERR054446	SUSCEPTIBLE	<0.06	<0.5
SMRU1499	ERR054447	SUSCEPTIBLE	<0.06	<0.5
SMRU1500	ERR054448	SUSCEPTIBLE	<0.06	<0.5
SMRU1501	ERR054449	NON-SUSCEPTIBLE	0.064	0.064
SMRU1502	ERR054450	SUSCEPTIBLE	<0.06	<0.5
SMRU1503	ERR054451	SUSCEPTIBLE	<0.06	<0.5
SMRU1504	ERR054452	SUSCEPTIBLE	<0.06	<0.5
SMRU1505	ERR054453	SUSCEPTIBLE	0.032	0.032
SMRU1506	ERR054454	NON-SUSCEPTIBLE	0.5	0.5
SMRU1507	ERR054455	SUSCEPTIBLE	<0.06	<0.5
SMRU1508	ERR054456	SUSCEPTIBLE	<0.06	<0.5
SMRU1509	ERR054457	SUSCEPTIBLE	<0.06	<0.5
SMRU1510	ERR054458	SUSCEPTIBLE	<0.06	<0.5
SMRU1511	ERR054459	NON-SUSCEPTIBLE	0.25	0.25
SMRU1512	ERR054460	SUSCEPTIBLE	<0.06	<0.5
SMRU1513	ERR054461	NON-SUSCEPTIBLE	0.5	0.5
SMRU1514	ERR054462	SUSCEPTIBLE	<0.06	<0.5
SMRU1515	ERR054463	NON-SUSCEPTIBLE	0.5	0.5
SMRU1516	ERR054464	SUSCEPTIBLE	<0.06	<0.5
SMRU1517	ERR054465	NON-SUSCEPTIBLE	0.5	0.5
SMRU1518	ERR054466	NON-SUSCEPTIBLE	0.5	0.5
SMRU1519	ERR054467	NON-SUSCEPTIBLE	0.25	0.25
SMRU1520	ERR054468	SUSCEPTIBLE	<0.06	<0.5
SMRU1521	ERR054469	SUSCEPTIBLE	<0.06	<0.5
SMRU1522	ERR054470	NON-SUSCEPTIBLE	0.5	0.25
SMRU1523	ERR054471	SUSCEPTIBLE	<0.06	<0.5
SMRU1524	ERR054472	SUSCEPTIBLE	<0.06	<0.5
SMRU1525	ERR054473	SUSCEPTIBLE	<0.06	<0.5
SMRU1526	ERR054474	SUSCEPTIBLE	<0.06	<0.5
SMRU1527	ERR054475	SUSCEPTIBLE	<0.06	<0.5
SMRU1528	ERR054476	NON-SUSCEPTIBLE	1	0.5
SMRU1529	ERR054477	SUSCEPTIBLE	<0.06	<0.5
SMRU1531	ERR054479	NON-SUSCEPTIBLE	0.5	0.5
SMRU1532	ERR054480	SUSCEPTIBLE	<0.06	<0.5
SMRU1533	ERR054481	SUSCEPTIBLE	<0.06	<0.5
SMRU1534	ERR054482	SUSCEPTIBLE	<0.06	<0.5
SMRU1535	ERR054483	SUSCEPTIBLE	<0.06	<0.5
SMRU1536	ERR054484	NON-SUSCEPTIBLE	1	1
SMRU1537	ERR054485	SUSCEPTIBLE	<0.06	<0.5
SMRU1538	ERR054486	SUSCEPTIBLE	<0.06	<0.5
SMRU1539	ERR054487	SUSCEPTIBLE	<0.06	<0.5
SMRU1540	ERR054488	NON-SUSCEPTIBLE	2	1
SMRU1541	ERR054489	SUSCEPTIBLE	<0.06	<0.5
SMRU1542	ERR054490	SUSCEPTIBLE	<0.06	<0.5
SMRU1543	ERR054491	NON-SUSCEPTIBLE	1	0.5
SMRU1544	ERR054492	NON-SUSCEPTIBLE	0.125	0.125
SMRU1545	ERR054493	SUSCEPTIBLE	<0.06	<0.5
SMRU1546	ERR054494	NON-SUSCEPTIBLE	0.125	0.064
SMRU1547	ERR054495	NON-SUSCEPTIBLE	0.25	0.25
SMRU1548	ERR054496	SUSCEPTIBLE	<0.06	<0.5
SMRU1549	ERR054497	SUSCEPTIBLE	<0.06	<0.5
SMRU1550	ERR054498	NON-SUSCEPTIBLE	0.5	0.25
SMRU1551	ERR054499	SUSCEPTIBLE	<0.06	<0.5
SMRU1552	ERR054500	SUSCEPTIBLE	<0.06	<0.5
SMRU1553	ERR054501	SUSCEPTIBLE	<0.06	<0.5
SMRU1554	ERR054502	NON-SUSCEPTIBLE	0.125	0.064
SMRU1555	ERR054503	NON-SUSCEPTIBLE	0.25	0.125
SMRU1556	ERR054504	NON-SUSCEPTIBLE	0.064	0.064
SMRU1557	ERR054505	NON-SUSCEPTIBLE	0.064	0.064
SMRU1558	ERR054506	NON-SUSCEPTIBLE	0.5	0.25
SMRU1559	ERR054507	NON-SUSCEPTIBLE	0.064	0.032
SMRU1560	ERR054508	NON-SUSCEPTIBLE	0.5	0.25
SMRU1561	ERR057759	NON-SUSCEPTIBLE	0.5	0.5
SMRU1562	ERR057760	SUSCEPTIBLE	0.032	0.064
SMRU1563	ERR057761	SUSCEPTIBLE	<0.06	<0.5
SMRU1564	ERR057762	SUSCEPTIBLE	<0.06	<0.5
SMRU1565	ERR057763	SUSCEPTIBLE	<0.06	<0.5
SMRU1566	ERR057764	SUSCEPTIBLE	<0.06	<0.5
SMRU1567	ERR057765	SUSCEPTIBLE	<0.06	<0.5
SMRU1568	ERR057766	NON-SUSCEPTIBLE	0.5	0.25
SMRU1569	ERR057767	SUSCEPTIBLE	<0.06	<0.5
SMRU1570	ERR057768	SUSCEPTIBLE	<0.06	<0.5
SMRU1571	ERR057769	SUSCEPTIBLE	<0.06	<0.5
SMRU1572	ERR057770	SUSCEPTIBLE	<0.06	<0.5
SMRU1573	ERR057771	NON-SUSCEPTIBLE	0.5	0.25
SMRU1574	ERR057772	NON-SUSCEPTIBLE	1	0.5
SMRU1575	ERR057773	NON-SUSCEPTIBLE	0.5	0.25
SMRU1576	ERR057774	SUSCEPTIBLE	<0.06	<0.5
SMRU1577	ERR057775	SUSCEPTIBLE	<0.06	<0.5
SMRU1578	ERR057776	NON-SUSCEPTIBLE	0.25	0.125
SMRU1579	ERR057777	NON-SUSCEPTIBLE	1	1
SMRU1580	ERR057778	SUSCEPTIBLE	<0.06	<0.5
SMRU1581	ERR057779	SUSCEPTIBLE	<0.06	<0.5
SMRU1582	ERR057780	NON-SUSCEPTIBLE	1	1
SMRU1584	ERR057782	SUSCEPTIBLE	<0.06	<0.5
SMRU1585	ERR057783	NON-SUSCEPTIBLE	0.5	1
SMRU1586	ERR057784	SUSCEPTIBLE	<0.06	<0.5
SMRU1587	ERR057785	NON-SUSCEPTIBLE	0.5	0.5
SMRU1588	ERR057786	SUSCEPTIBLE	<0.06	<0.5
SMRU1589	ERR057787	SUSCEPTIBLE	<0.06	<0.5
SMRU1590	ERR057788	NON-SUSCEPTIBLE	0.5	1
SMRU1591	ERR057789	NON-SUSCEPTIBLE	1	0.5
SMRU1592	ERR057790	SUSCEPTIBLE	<0.06	<0.5
SMRU1593	ERR057791	SUSCEPTIBLE	<0.06	<0.5
SMRU1594	ERR057792	NON-SUSCEPTIBLE	0.5	0.5
SMRU1595	ERR057793	SUSCEPTIBLE	<0.06	<0.5
SMRU1596	ERR057794	SUSCEPTIBLE	<0.06	<0.5
SMRU1597	ERR057795	SUSCEPTIBLE	<0.06	<0.5
SMRU1598	ERR057796	NON-SUSCEPTIBLE	1	0.5
SMRU1599	ERR057797	NON-SUSCEPTIBLE	0.25	0.25
SMRU1600	ERR057798	NON-SUSCEPTIBLE	0.5	0.5
SMRU1601	ERR057799	NON-SUSCEPTIBLE	0.5	0.25
SMRU1602	ERR057800	NON-SUSCEPTIBLE	1	1
SMRU1603	ERR057801	SUSCEPTIBLE	<0.06	<0.5
SMRU1604	ERR057802	SUSCEPTIBLE	<0.06	<0.5
SMRU1605	ERR057803	SUSCEPTIBLE	<0.06	<0.5
SMRU1606	ERR057804	SUSCEPTIBLE	<0.06	<0.5
SMRU1607	ERR057805	SUSCEPTIBLE	<0.06	<0.5
SMRU1608	ERR057806	NON-SUSCEPTIBLE	0.5	0.5
SMRU1609	ERR057807	NON-SUSCEPTIBLE	0.5	0.5
SMRU1610	ERR057808	SUSCEPTIBLE	<0.06	<0.5
SMRU1611	ERR057809	NON-SUSCEPTIBLE	0.25	0.25
SMRU1612	ERR057810	NON-SUSCEPTIBLE	1	0.5
SMRU1613	ERR057811	SUSCEPTIBLE	<0.06	<0.5
SMRU1614	ERR057812	SUSCEPTIBLE	<0.06	<0.5
SMRU1615	ERR057813	NON-SUSCEPTIBLE	0.5	0.5
SMRU1616	ERR057814	NON-SUSCEPTIBLE	1	0.5
SMRU1617	ERR057815	SUSCEPTIBLE	<0.06	<0.5
SMRU1618	ERR057816	SUSCEPTIBLE	<0.06	<0.5
SMRU1619	ERR057817	SUSCEPTIBLE	<0.06	<0.5
SMRU1620	ERR057818	NON-SUSCEPTIBLE	0.125	0.25
SMRU1621	ERR057819	SUSCEPTIBLE	<0.06	<0.5
SMRU1623	ERR057821	SUSCEPTIBLE	<0.06	<0.5
SMRU1624	ERR057822	SUSCEPTIBLE	<0.06	<0.5
SMRU1625	ERR057823	SUSCEPTIBLE	<0.06	<0.5
SMRU1626	ERR057824	NON-SUSCEPTIBLE	0.125	0.125
SMRU1627	ERR057825	NON-SUSCEPTIBLE	0.5	0.5
SMRU1628	ERR057826	SUSCEPTIBLE	<0.06	<0.5
SMRU1629	ERR057827	NON-SUSCEPTIBLE	0.5	0.25
SMRU1630	ERR057828	NON-SUSCEPTIBLE	0.5	0.5
SMRU1631	ERR057829	SUSCEPTIBLE	<0.06	<0.5
SMRU1633	ERR059957	SUSCEPTIBLE	<0.06	<0.5
SMRU1634	ERR059958	NON-SUSCEPTIBLE	1	1
SMRU1635	ERR059959	SUSCEPTIBLE	<0.06	<0.5
SMRU1636	ERR059960	SUSCEPTIBLE	<0.06	<0.5
SMRU1637	ERR059961	NON-SUSCEPTIBLE	0.5	0.5
SMRU1638	ERR059962	NON-SUSCEPTIBLE	0.5	0.25
SMRU1639	ERR059963	SUSCEPTIBLE	<0.06	<0.5
SMRU1640	ERR059964	SUSCEPTIBLE	<0.06	<0.5
SMRU1642	ERR059966	SUSCEPTIBLE	<0.06	<0.5
SMRU1645	ERR059969	NON-SUSCEPTIBLE	0.25	0.25
SMRU1646	ERR059970	SUSCEPTIBLE	<0.06	<0.5
SMRU1647	ERR059971	NON-SUSCEPTIBLE	0.5	0.5
SMRU1648	ERR059972	SUSCEPTIBLE	<0.06	<0.5
SMRU1649	ERR059973	NON-SUSCEPTIBLE	0.5	0.25
SMRU1650	ERR059974	SUSCEPTIBLE	<0.06	<0.5
SMRU1652	ERR059976	NON-SUSCEPTIBLE	0.5	0.25
SMRU1653	ERR059977	SUSCEPTIBLE	<0.06	<0.5
SMRU1655	ERR059979	SUSCEPTIBLE	<0.06	<0.5
SMRU1656	ERR059980	SUSCEPTIBLE	<0.06	<0.5
SMRU1657	ERR056803	NON-SUSCEPTIBLE	1	0.5
SMRU1658	ERR056804	NON-SUSCEPTIBLE	0.125	0.25
SMRU1659	ERR056805	SUSCEPTIBLE	<0.06	<0.5
SMRU1660	ERR056806	NON-SUSCEPTIBLE	0.5	0.5
SMRU1661	ERR056807	NON-SUSCEPTIBLE	0.5	0.5
SMRU1662	ERR056808	NON-SUSCEPTIBLE	0.25	0.125
SMRU1663	ERR056809	SUSCEPTIBLE	<0.06	<0.5
SMRU1664	ERR056810	NON-SUSCEPTIBLE	0.5	0.25
SMRU1665	ERR056811	NON-SUSCEPTIBLE	0.5	0.5
SMRU1666	ERR056812	NON-SUSCEPTIBLE	0.5	0.5
SMRU1667	ERR056813	SUSCEPTIBLE	<0.06	<0.5
SMRU1668	ERR056814	NON-SUSCEPTIBLE	2	0.5
SMRU1669	ERR056815	NON-SUSCEPTIBLE	0.5	0.5
SMRU1670	ERR056816	NON-SUSCEPTIBLE	0.125	0.125
SMRU1671	ERR056817	NON-SUSCEPTIBLE	0.5	0.5
SMRU1672	ERR056818	SUSCEPTIBLE	<0.06	<0.5
SMRU1673	ERR056819	NON-SUSCEPTIBLE	0.064	0.064
SMRU1674	ERR056820	NON-SUSCEPTIBLE	0.25	0.25
SMRU1675	ERR056821	SUSCEPTIBLE	<0.06	<0.5
SMRU1676	ERR056822	NON-SUSCEPTIBLE	0.5	0.5
SMRU1677	ERR056823	SUSCEPTIBLE	<0.06	<0.5
SMRU1678	ERR056824	NON-SUSCEPTIBLE	0.25	0.25
SMRU1679	ERR056825	NON-SUSCEPTIBLE	1	0.5
SMRU1680	ERR056826	NON-SUSCEPTIBLE	0.125	0.125
SMRU1681	ERR056827	SUSCEPTIBLE	<0.06	<0.5
SMRU1682	ERR056828	SUSCEPTIBLE	<0.06	<0.5
SMRU1683	ERR056829	SUSCEPTIBLE	<0.06	<0.5
SMRU1684	ERR056830	SUSCEPTIBLE	<0.06	<0.5
SMRU1685	ERR056831	SUSCEPTIBLE	<0.06	<0.5
SMRU1686	ERR056832	NON-SUSCEPTIBLE	0.25	0.5
SMRU1687	ERR056833	NON-SUSCEPTIBLE	1	0.5
SMRU1688	ERR056834	SUSCEPTIBLE	<0.06	<0.5
SMRU1689	ERR056835	NON-SUSCEPTIBLE	0.5	0.25
SMRU1690	ERR056836	SUSCEPTIBLE	<0.06	<0.5
SMRU1691	ERR056837	NON-SUSCEPTIBLE	0.5	0.25
SMRU1692	ERR056838	SUSCEPTIBLE	<0.06	<0.5
SMRU1693	ERR056839	SUSCEPTIBLE	<0.06	<0.5
SMRU1694	ERR056840	NON-SUSCEPTIBLE	0.5	0.25
SMRU1695	ERR056841	SUSCEPTIBLE	<0.06	<0.5
SMRU1696	ERR056842	NON-SUSCEPTIBLE	0.5	0.5
SMRU1697	ERR056843	SUSCEPTIBLE	<0.06	<0.5
SMRU1699	ERR056845	NON-SUSCEPTIBLE	0.5	0.25
SMRU1700	ERR056846	SUSCEPTIBLE	<0.06	<0.5
SMRU1701	ERR056847	SUSCEPTIBLE	<0.06	<0.5
SMRU1702	ERR056848	SUSCEPTIBLE	<0.06	<0.5
SMRU1703	ERR056849	SUSCEPTIBLE	<0.06	<0.5
SMRU1705	ERR056851	SUSCEPTIBLE	<0.06	<0.5
SMRU1706	ERR056852	SUSCEPTIBLE	<0.06	<0.5
SMRU1707	ERR056853	NON-SUSCEPTIBLE	0.5	0.25
SMRU1708	ERR056854	NON-SUSCEPTIBLE	0.5	0.5
SMRU1709	ERR056855	SUSCEPTIBLE	<0.06	<0.5
SMRU1710	ERR056856	NON-SUSCEPTIBLE	0.25	0.25
SMRU1712	ERR056858	SUSCEPTIBLE	<0.06	<0.5
SMRU1713	ERR056859	NON-SUSCEPTIBLE	2	1
SMRU1714	ERR056860	SUSCEPTIBLE	<0.06	<0.5
SMRU1715	ERR056861	NON-SUSCEPTIBLE	1	0.5
SMRU1716	ERR056862	SUSCEPTIBLE	<0.06	<0.5
SMRU1717	ERR056863	SUSCEPTIBLE	<0.06	<0.5
SMRU1718	ERR056864	NON-SUSCEPTIBLE	0.5	0.25
SMRU1719	ERR056865	SUSCEPTIBLE	<0.06	<0.5
SMRU1720	ERR056866	NON-SUSCEPTIBLE	0.25	0.125
SMRU1721	ERR056867	NON-SUSCEPTIBLE	1	0.5
SMRU1722	ERR056868	NON-SUSCEPTIBLE	0.125	0.125
SMRU1723	ERR056869	NON-SUSCEPTIBLE	0.5	0.25
SMRU1724	ERR056870	SUSCEPTIBLE	<0.06	<0.5
SMRU1725	ERR056871	SUSCEPTIBLE	<0.06	<0.5
SMRU1726	ERR056872	NON-SUSCEPTIBLE	0.125	0.125
SMRU1727	ERR056873	NON-SUSCEPTIBLE	0.25	0.125
SMRU1728	ERR056874	SUSCEPTIBLE	<0.06	<0.5
SMRU1729	ERR056875	SUSCEPTIBLE	<0.06	<0.5
SMRU1730	ERR056876	SUSCEPTIBLE	<0.06	<0.5
SMRU1731	ERR056877	SUSCEPTIBLE	<0.06	<0.5
SMRU1732	ERR056878	SUSCEPTIBLE	<0.06	<0.5
SMRU1733	ERR056879	NON-SUSCEPTIBLE	0.064	0.064
SMRU1734	ERR056880	SUSCEPTIBLE	<0.06	<0.5
SMRU1736	ERR056881	NON-SUSCEPTIBLE	1	0.5
SMRU1738	ERR056883	SUSCEPTIBLE	<0.06	<0.5
SMRU1739	ERR056884	NON-SUSCEPTIBLE	1	0.5
SMRU1740	ERR056885	SUSCEPTIBLE	<0.06	<0.5
SMRU1741	ERR056886	SUSCEPTIBLE	<0.06	<0.5
SMRU1742	ERR056887	SUSCEPTIBLE	<0.06	<0.5
SMRU1743	ERR056888	NON-SUSCEPTIBLE	0.125	0.064
SMRU1744	ERR056889	SUSCEPTIBLE	<0.06	<0.5
SMRU1745	ERR056890	NON-SUSCEPTIBLE	0.5	0.25
SMRU1746	ERR056891	SUSCEPTIBLE	<0.06	<0.5
SMRU1747	ERR056892	SUSCEPTIBLE	<0.06	<0.5
SMRU1748	ERR056893	SUSCEPTIBLE	<0.06	<0.5
SMRU1749	ERR056894	SUSCEPTIBLE	<0.06	<0.5
SMRU1750	ERR056895	SUSCEPTIBLE	<0.06	<0.5
SMRU1751	ERR056896	SUSCEPTIBLE	<0.06	<0.5
SMRU1752	ERR056897	NON-SUSCEPTIBLE	0.5	0.25
SMRU1753	ERR059981	NON-SUSCEPTIBLE	0.125	0.125
SMRU1754	ERR059982	NON-SUSCEPTIBLE	2	0.5
SMRU1755	ERR059983	NON-SUSCEPTIBLE	1	0.5
SMRU1756	ERR059984	SUSCEPTIBLE	<0.06	<0.5
SMRU1757	ERR059985	NON-SUSCEPTIBLE	0.5	0.25
SMRU1758	ERR059986	SUSCEPTIBLE	<0.06	<0.5
SMRU1759	ERR059987	NON-SUSCEPTIBLE	0.25	0.25
SMRU1760	ERR059988	NON-SUSCEPTIBLE	0.25	0.125
SMRU1761	ERR059989	SUSCEPTIBLE	<0.06	<0.5
SMRU1762	ERR059990	NON-SUSCEPTIBLE	0.125	0.064
SMRU1763	ERR059991	NON-SUSCEPTIBLE	0.25	0.25
SMRU1764	ERR059992	NON-SUSCEPTIBLE	1	0.5
SMRU1765	ERR059993	NON-SUSCEPTIBLE	1	0.5
SMRU1766	ERR059994	SUSCEPTIBLE	<0.06	<0.5
SMRU1767	ERR059995	NON-SUSCEPTIBLE	0.5	0.25
SMRU1768	ERR059996	NON-SUSCEPTIBLE	1	1
SMRU1769	ERR059997	SUSCEPTIBLE	<0.06	<0.5
SMRU1770	ERR059998	SUSCEPTIBLE	<0.06	<0.5
SMRU1771	ERR059999	SUSCEPTIBLE	<0.06	<0.5
SMRU1772	ERR060000	NON-SUSCEPTIBLE	1	0.5
SMRU1773	ERR060001	SUSCEPTIBLE	<0.06	<0.5
SMRU1774	ERR060002	NON-SUSCEPTIBLE	0.5	0.5
SMRU1775	ERR060003	NON-SUSCEPTIBLE	0.5	0.25
SMRU1776	ERR060004	NON-SUSCEPTIBLE	0.5	0.25
SMRU1777	ERR063786	NON-SUSCEPTIBLE	1	0.5
SMRU1778	ERR063787	NON-SUSCEPTIBLE	0.5	0.5
SMRU1779	ERR063788	NON-SUSCEPTIBLE	1	0.5
SMRU1780	ERR063789	NON-SUSCEPTIBLE	0.064	0.064
SMRU1781	ERR063790	SUSCEPTIBLE	<0.06	<0.5
SMRU1782	ERR063791	SUSCEPTIBLE	<0.06	<0.5
SMRU1783	ERR063792	NON-SUSCEPTIBLE	0.125	0.125
SMRU1784	ERR063793	NON-SUSCEPTIBLE	1	0.5
SMRU1785	ERR063794	SUSCEPTIBLE	<0.06	<0.5
SMRU1786	ERR063795	NON-SUSCEPTIBLE	2	1
SMRU1787	ERR063796	NON-SUSCEPTIBLE	1	0.5
SMRU1788	ERR063797	SUSCEPTIBLE	<0.06	<0.5
SMRU1789	ERR063798	NON-SUSCEPTIBLE	0.25	0.125
SMRU1790	ERR063799	NON-SUSCEPTIBLE	0.25	0.125
SMRU1791	ERR063800	SUSCEPTIBLE	<0.06	<0.5
SMRU1792	ERR063801	NON-SUSCEPTIBLE	1	0.5
SMRU1793	ERR063802	NON-SUSCEPTIBLE	0.5	1
SMRU1794	ERR063803	NON-SUSCEPTIBLE	0.125	0.125
SMRU1795	ERR063804	SUSCEPTIBLE	<0.06	<0.5
SMRU1796	ERR063805	NON-SUSCEPTIBLE	0.125	0.25
SMRU1798	ERR063807	SUSCEPTIBLE	<0.06	<0.5
SMRU1799	ERR063808	SUSCEPTIBLE	<0.06	<0.5
SMRU1800	ERR063809	NON-SUSCEPTIBLE	1	0.25
SMRU1801	ERR060005	NON-SUSCEPTIBLE	1	0.5
SMRU1802	ERR060006	NON-SUSCEPTIBLE	1	0.5
SMRU1803	ERR060007	SUSCEPTIBLE	<0.06	<0.5
SMRU1804	ERR060008	NON-SUSCEPTIBLE	0.5	0.25
SMRU1805	ERR060009	NON-SUSCEPTIBLE	0.25	0.064
SMRU1806	ERR060010	NON-SUSCEPTIBLE	0.125	0.064
SMRU1807	ERR060011	NON-SUSCEPTIBLE	1	0.5
SMRU1808	ERR060012	NON-SUSCEPTIBLE	1	0.5
SMRU1809	ERR060013	NON-SUSCEPTIBLE	2	1
SMRU1810	ERR060014	NON-SUSCEPTIBLE	1	0.5
SMRU1811	ERR060015	SUSCEPTIBLE	<0.06	<0.5
SMRU1812	ERR060016	NON-SUSCEPTIBLE	0.125	0.064
SMRU1813	ERR060017	NON-SUSCEPTIBLE	4	1
SMRU1814	ERR060018	SUSCEPTIBLE	<0.06	<0.5
SMRU1815	ERR060019	NON-SUSCEPTIBLE	0.25	0.125
SMRU1816	ERR060020	NON-SUSCEPTIBLE	1	0.5
SMRU1817	ERR060021	SUSCEPTIBLE	<0.06	<0.5
SMRU1818	ERR060022	SUSCEPTIBLE	<0.06	<0.5
SMRU1819	ERR060023	NON-SUSCEPTIBLE	0.25	0.125
SMRU1820	ERR060024	NON-SUSCEPTIBLE	0.25	0.125
SMRU1821	ERR060025	SUSCEPTIBLE	<0.06	<0.5
SMRU1822	ERR060026	SUSCEPTIBLE	<0.06	<0.5
SMRU1823	ERR060027	SUSCEPTIBLE	<0.06	<0.5
SMRU1824	ERR060028	NON-SUSCEPTIBLE	1	0.5
SMRU1825	ERR089616	SUSCEPTIBLE	<0.06	<0.5
SMRU1826	ERR089617	NON-SUSCEPTIBLE	0.25	0.25
SMRU1827	ERR089618	SUSCEPTIBLE	<0.06	<0.5
SMRU1828	ERR089619	SUSCEPTIBLE	<0.06	<0.5
SMRU1829	ERR089620	NON-SUSCEPTIBLE	0.5	0.25
SMRU1830	ERR089621	NON-SUSCEPTIBLE	0.5	0.25
SMRU1831	ERR089622	NON-SUSCEPTIBLE	1	0.5
SMRU1832	ERR089623	NON-SUSCEPTIBLE	0.125	0.125
SMRU1833	ERR089624	NON-SUSCEPTIBLE	0.25	0.125
SMRU1837	ERR089628	NON-SUSCEPTIBLE	1	0.5
SMRU1838	ERR089629	NON-SUSCEPTIBLE	0.5	0.25
SMRU1839	ERR089630	SUSCEPTIBLE	<0.06	<0.5
SMRU1843	ERR089634	SUSCEPTIBLE	<0.06	<0.5
SMRU1844	ERR089635	SUSCEPTIBLE	<0.06	<0.5
SMRU1845	ERR089636	SUSCEPTIBLE	<0.06	<0.5
SMRU1850	ERR057831	NON-SUSCEPTIBLE	0.25	0.125
SMRU1851	ERR057832	SUSCEPTIBLE	<0.06	<0.5
SMRU1853	ERR057834	NON-SUSCEPTIBLE	1	0.5
SMRU1855	ERR057836	NON-SUSCEPTIBLE	1	0.25
SMRU1856	ERR057837	NON-SUSCEPTIBLE	0.5	0.5
SMRU1857	ERR057838	SUSCEPTIBLE	<0.06	<0.5
SMRU1858	ERR057839	NON-SUSCEPTIBLE	0.5	0.25
SMRU1859	ERR057840	SUSCEPTIBLE	<0.06	<0.5
SMRU1860	ERR057841	SUSCEPTIBLE	<0.06	<0.5
SMRU1861	ERR057842	SUSCEPTIBLE	<0.06	<0.5
SMRU1862	ERR057843	SUSCEPTIBLE	<0.06	<0.5
SMRU1863	ERR057844	NON-SUSCEPTIBLE	1	0.5
SMRU1864	ERR057845	NON-SUSCEPTIBLE	0.5	0.25
SMRU1865	ERR057846	NON-SUSCEPTIBLE	1	0.5
SMRU1866	ERR057847	NON-SUSCEPTIBLE	1	0.5
SMRU1867	ERR057848	SUSCEPTIBLE	<0.06	<0.5
SMRU1868	ERR057849	NON-SUSCEPTIBLE	1	0.5
SMRU1869	ERR057850	SUSCEPTIBLE	<0.06	<0.5
SMRU1870	ERR057851	SUSCEPTIBLE	<0.06	<0.5
SMRU1871	ERR057852	SUSCEPTIBLE	<0.06	<0.5
SMRU1872	ERR057853	NON-SUSCEPTIBLE	0.5	0.25
SMRU1873	ERR057854	NON-SUSCEPTIBLE	2	1
SMRU1874	ERR057855	NON-SUSCEPTIBLE	1	0.5
SMRU1875	ERR057856	NON-SUSCEPTIBLE	0.5	0.25
SMRU1876	ERR057857	NON-SUSCEPTIBLE	1	0.5
SMRU1877	ERR057858	NON-SUSCEPTIBLE	0.5	0.25
SMRU1878	ERR057859	SUSCEPTIBLE	<0.06	<0.5
SMRU1879	ERR057860	NON-SUSCEPTIBLE	0.064	0.064
SMRU1880	ERR057861	SUSCEPTIBLE	<0.06	<0.5
SMRU1881	ERR057862	NON-SUSCEPTIBLE	0.25	0.125
SMRU1882	ERR057863	NON-SUSCEPTIBLE	1	1
SMRU1883	ERR057864	SUSCEPTIBLE	<0.06	<0.5
SMRU1884	ERR057865	SUSCEPTIBLE	<0.06	<0.5
SMRU1885	ERR057866	SUSCEPTIBLE	<0.06	<0.5
SMRU1886	ERR057867	SUSCEPTIBLE	<0.06	<0.5
SMRU1887	ERR057868	SUSCEPTIBLE	<0.06	<0.5
SMRU1888	ERR057869	SUSCEPTIBLE	<0.06	<0.5
SMRU1889	ERR057870	NON-SUSCEPTIBLE	0.064	0.064
SMRU1890	ERR057871	NON-SUSCEPTIBLE	1	0.5
SMRU1891	ERR057872	SUSCEPTIBLE	<0.06	<0.5
SMRU1892	ERR057873	NON-SUSCEPTIBLE	1	0.5
SMRU1893	ERR057874	SUSCEPTIBLE	<0.06	<0.5
SMRU1894	ERR057875	SUSCEPTIBLE	<0.06	<0.5
SMRU1895	ERR057876	NON-SUSCEPTIBLE	1	0.5
SMRU1896	ERR057877	SUSCEPTIBLE	<0.06	<0.5
SMRU1897	ERR057878	SUSCEPTIBLE	<0.06	<0.5
SMRU1898	ERR057879	SUSCEPTIBLE	<0.06	<0.5
SMRU1899	ERR057880	NON-SUSCEPTIBLE	2	0.5
SMRU1900	ERR057881	SUSCEPTIBLE	<0.06	<0.5
SMRU1901	ERR057882	NON-SUSCEPTIBLE	0.5	0.25
SMRU1902	ERR057883	NON-SUSCEPTIBLE	0.5	0.25
SMRU1903	ERR057884	NON-SUSCEPTIBLE	0.25	0.25
SMRU1904	ERR057885	SUSCEPTIBLE	<0.06	<0.5
SMRU1905	ERR057886	SUSCEPTIBLE	<0.06	<0.5
SMRU1906	ERR057887	SUSCEPTIBLE	<0.06	<0.5
SMRU1907	ERR057888	NON-SUSCEPTIBLE	1	0.5
SMRU1908	ERR057889	NON-SUSCEPTIBLE	1	1
SMRU1909	ERR057890	NON-SUSCEPTIBLE	0.5	0.25
SMRU1910	ERR057891	NON-SUSCEPTIBLE	1	0.5
SMRU1911	ERR057892	SUSCEPTIBLE	<0.06	<0.5
SMRU1912	ERR057893	NON-SUSCEPTIBLE	2	1
SMRU1913	ERR057894	NON-SUSCEPTIBLE	2	1
SMRU1914	ERR057895	NON-SUSCEPTIBLE	1	0.5
SMRU1915	ERR057896	NON-SUSCEPTIBLE	0.25	0.25
SMRU1916	ERR057897	SUSCEPTIBLE	<0.06	<0.5
SMRU1917	ERR057898	SUSCEPTIBLE	<0.06	<0.5
SMRU1918	ERR057899	NON-SUSCEPTIBLE	0.5	0.5
SMRU1919	ERR057900	NON-SUSCEPTIBLE	2	0.5
SMRU1920	ERR057901	SUSCEPTIBLE	<0.06	<0.5
SMRU1921	ERR057902	SUSCEPTIBLE	<0.06	<0.5
SMRU1922	ERR057903	NON-SUSCEPTIBLE	2	1
SMRU1923	ERR057904	SUSCEPTIBLE	<0.06	<0.5
SMRU1924	ERR057905	SUSCEPTIBLE	<0.06	<0.5
SMRU1925	ERR057906	NON-SUSCEPTIBLE	0.25	0.25
SMRU1926	ERR057907	SUSCEPTIBLE	<0.06	<0.5
SMRU1927	ERR057908	NON-SUSCEPTIBLE	0.25	0.125
SMRU1928	ERR057909	SUSCEPTIBLE	<0.06	<0.5
SMRU1929	ERR057910	SUSCEPTIBLE	<0.06	<0.5
SMRU1930	ERR057911	NON-SUSCEPTIBLE	0.25	0.5
SMRU1931	ERR057912	SUSCEPTIBLE	<0.06	<0.5
SMRU1932	ERR057913	NON-SUSCEPTIBLE	1	0.5
SMRU1933	ERR057914	SUSCEPTIBLE	<0.06	<0.5
SMRU1934	ERR057915	NON-SUSCEPTIBLE	0.125	0.25
SMRU1935	ERR057916	SUSCEPTIBLE	<0.06	<0.5
SMRU1936	ERR057917	NON-SUSCEPTIBLE	0.125	0.064
SMRU1937	ERR057918	NON-SUSCEPTIBLE	1	1
SMRU1938	ERR057919	NON-SUSCEPTIBLE	0.125	0.125
SMRU1939	ERR057920	SUSCEPTIBLE	<0.06	<0.5
SMRU1940	ERR057921	SUSCEPTIBLE	<0.06	<0.5
SMRU1941	ERR057922	NON-SUSCEPTIBLE	0.5	0.25
SMRU1942	ERR057923	NON-SUSCEPTIBLE	1	0.25
SMRU1943	ERR057924	SUSCEPTIBLE	<0.06	<0.5
SMRU1944	ERR057925	SUSCEPTIBLE	<0.06	<0.5
SMRU1945	ERR057926	SUSCEPTIBLE	<0.06	<0.5
SMRU1946	ERR057927	SUSCEPTIBLE	<0.06	<0.5
SMRU1947	ERR057928	NON-SUSCEPTIBLE	1	1
SMRU1948	ERR057929	NON-SUSCEPTIBLE	1	0.5
SMRU1949	ERR057930	NON-SUSCEPTIBLE	0.5	0.25
SMRU1950	ERR057931	NON-SUSCEPTIBLE	1	1
SMRU1951	ERR057932	SUSCEPTIBLE	<0.06	<0.5
SMRU1952	ERR057933	NON-SUSCEPTIBLE	1	0.5
SMRU1953	ERR057934	SUSCEPTIBLE	<0.06	<0.5
SMRU1954	ERR057935	NON-SUSCEPTIBLE	1	0.5
SMRU1955	ERR057936	SUSCEPTIBLE	<0.06	<0.5
SMRU1956	ERR057937	NON-SUSCEPTIBLE	0.064	0.125
SMRU1957	ERR057938	SUSCEPTIBLE	<0.06	<0.5
SMRU1958	ERR057939	NON-SUSCEPTIBLE	2	0.5
SMRU1959	ERR057940	SUSCEPTIBLE	<0.06	<0.5
SMRU1960	ERR057941	SUSCEPTIBLE	<0.06	<0.5
SMRU1961	ERR057942	SUSCEPTIBLE	<0.06	<0.5
SMRU1962	ERR057943	SUSCEPTIBLE	<0.06	<0.5
SMRU1963	ERR057944	SUSCEPTIBLE	<0.06	<0.5
SMRU1964	ERR057945	SUSCEPTIBLE	<0.06	<0.5
SMRU1965	ERR057946	NON-SUSCEPTIBLE	1	1
SMRU1966	ERR057947	NON-SUSCEPTIBLE	0.25	0.125
SMRU1967	ERR057948	SUSCEPTIBLE	<0.06	<0.5
SMRU1968	ERR057949	NON-SUSCEPTIBLE	1	0.5
SMRU1969	ERR057950	NON-SUSCEPTIBLE	0.25	0.25
SMRU1970	ERR057951	SUSCEPTIBLE	<0.06	<0.5
SMRU1971	ERR057952	SUSCEPTIBLE	<0.06	<0.5
SMRU1972	ERR057953	NON-SUSCEPTIBLE	0.125	0.25
SMRU1973	ERR057954	NON-SUSCEPTIBLE	0.125	0.125
SMRU1974	ERR057955	NON-SUSCEPTIBLE	0.125	0.125
SMRU1975	ERR057956	NON-SUSCEPTIBLE	1	1
SMRU1976	ERR057957	SUSCEPTIBLE	<0.06	<0.5
SMRU1977	ERR057958	NON-SUSCEPTIBLE	1	0.5
SMRU1978	ERR057959	NON-SUSCEPTIBLE	1	0.5
SMRU1979	ERR057960	SUSCEPTIBLE	<0.06	<0.5
SMRU1980	ERR057961	NON-SUSCEPTIBLE	1	1
SMRU1981	ERR057962	SUSCEPTIBLE	<0.06	<0.5
SMRU1982	ERR057963	NON-SUSCEPTIBLE	1	0.5
SMRU1983	ERR057964	SUSCEPTIBLE	<0.06	<0.5
SMRU1984	ERR057965	SUSCEPTIBLE	<0.06	<0.5
SMRU1985	ERR057966	SUSCEPTIBLE	<0.06	<0.5
SMRU1986	ERR057967	SUSCEPTIBLE	<0.06	<0.5
SMRU1987	ERR057968	SUSCEPTIBLE	<0.06	<0.5
SMRU1988	ERR057969	SUSCEPTIBLE	<0.06	<0.5
SMRU1989	ERR057970	SUSCEPTIBLE	<0.06	<0.5
SMRU1990	ERR057971	SUSCEPTIBLE	<0.06	<0.5
SMRU1991	ERR057972	SUSCEPTIBLE	<0.06	<0.5
SMRU1992	ERR057973	NON-SUSCEPTIBLE	1	0.5
SMRU1993	ERR057974	NON-SUSCEPTIBLE	1	0.5
SMRU1994	ERR057975	NON-SUSCEPTIBLE	0.5	0.25
SMRU1995	ERR057976	SUSCEPTIBLE	<0.06	<0.5
SMRU1996	ERR057977	SUSCEPTIBLE	<0.06	<0.5
SMRU1997	ERR057978	NON-SUSCEPTIBLE	1	0.5
SMRU1998	ERR057979	SUSCEPTIBLE	<0.06	<0.5
SMRU1999	ERR057980	SUSCEPTIBLE	<0.06	<0.5
SMRU2000	ERR057981	NON-SUSCEPTIBLE	1	1
SMRU2001	ERR057982	NON-SUSCEPTIBLE	0.5	0.125
SMRU2002	ERR057983	NON-SUSCEPTIBLE	1	0.5
SMRU2003	ERR057984	NON-SUSCEPTIBLE	0.125	0.064
SMRU2004	ERR057985	NON-SUSCEPTIBLE	1	1
SMRU2005	ERR057986	NON-SUSCEPTIBLE	1	1
SMRU2006	ERR057987	SUSCEPTIBLE	<0.06	<0.5
SMRU2007	ERR057988	NON-SUSCEPTIBLE	0.5	0.25
SMRU2008	ERR057989	NON-SUSCEPTIBLE	2	1
SMRU2009	ERR057990	NON-SUSCEPTIBLE	1	1
SMRU2010	ERR057991	NON-SUSCEPTIBLE	0.125	0.064
SMRU2011	ERR057992	NON-SUSCEPTIBLE	1	0.5
SMRU2012	ERR057993	NON-SUSCEPTIBLE	1	0.5
SMRU2013	ERR057994	NON-SUSCEPTIBLE	0.5	0.5
SMRU2014	ERR057995	NON-SUSCEPTIBLE	2	0.5
SMRU2015	ERR057996	SUSCEPTIBLE	<0.06	<0.5
SMRU2016	ERR057997	NON-SUSCEPTIBLE	0.5	0.5
SMRU2017	ERR063810	NON-SUSCEPTIBLE	1	0.5
SMRU2018	ERR063811	SUSCEPTIBLE	<0.06	<0.5
SMRU2019	ERR063812	SUSCEPTIBLE	<0.06	<0.5
SMRU2020	ERR063813	SUSCEPTIBLE	<0.06	<0.5
SMRU2021	ERR063814	SUSCEPTIBLE	<0.06	<0.5
SMRU2022	ERR063815	SUSCEPTIBLE	<0.06	<0.5
SMRU2023	ERR063816	SUSCEPTIBLE	<0.06	<0.5
SMRU2024	ERR063817	SUSCEPTIBLE	<0.06	<0.5
SMRU2025	ERR063818	SUSCEPTIBLE	<0.06	<0.5
SMRU2026	ERR063819	SUSCEPTIBLE	<0.06	<0.5
SMRU2027	ERR063820	SUSCEPTIBLE	<0.06	<0.5
SMRU2028	ERR063821	SUSCEPTIBLE	<0.06	<0.5
SMRU2029	ERR063822	NON-SUSCEPTIBLE	0.25	0.25
SMRU2030	ERR063823	SUSCEPTIBLE	<0.06	<0.5
SMRU2031	ERR063824	SUSCEPTIBLE	<0.06	<0.5
SMRU2032	ERR063825	NON-SUSCEPTIBLE	0.25	0.25
SMRU2033	ERR063826	SUSCEPTIBLE	<0.06	<0.5
SMRU2034	ERR063827	SUSCEPTIBLE	<0.06	<0.5
SMRU2035	ERR063828	SUSCEPTIBLE	<0.06	<0.5
SMRU2036	ERR063829	NON-SUSCEPTIBLE	0.25	0.25
SMRU2037	ERR063830	NON-SUSCEPTIBLE	0.5	0.25
SMRU2038	ERR063831	SUSCEPTIBLE	<0.06	<0.5
SMRU2039	ERR063832	SUSCEPTIBLE	<0.06	<0.5
SMRU2040	ERR063833	NON-SUSCEPTIBLE	0.5	0.5
SMRU2041	ERR063834	NON-SUSCEPTIBLE	0.25	0.125
SMRU2042	ERR063835	NON-SUSCEPTIBLE	1	0.5
SMRU2043	ERR063836	SUSCEPTIBLE	<0.06	<0.5
SMRU2044	ERR063837	NON-SUSCEPTIBLE	1	0.5
SMRU2045	ERR063838	SUSCEPTIBLE	<0.06	<0.5
SMRU2046	ERR063839	SUSCEPTIBLE	<0.06	<0.5
SMRU2047	ERR063840	NON-SUSCEPTIBLE	1	1
SMRU2048	ERR063841	NON-SUSCEPTIBLE	0.5	0.25
SMRU2049	ERR063842	SUSCEPTIBLE	<0.06	<0.5
SMRU2050	ERR063843	NON-SUSCEPTIBLE	2	1
SMRU2051	ERR063844	SUSCEPTIBLE	<0.06	<0.5
SMRU2052	ERR063845	NON-SUSCEPTIBLE	1	0.5
SMRU2053	ERR063846	SUSCEPTIBLE	<0.06	<0.5
[truncated: 1,086 more rows]
